# Supplementary material for: SPAAC iClick: progress towards a bioorthogonal reaction in-corporating metal ions
Source: Royal Society of Chemistry journal article supplement (doi:10.1039/d1dt02626g), 2021-01-01
Supplement: d1dt02626g1.pdf [file d1dt02626g1.pdf]

## Supporting Information

### SPAAC iClick: Progress Towards a Bioorthogonal Reaction Incorporating Metal Ions

Yu-Hsuan Shen,<sup>a</sup> Alec M. Esper,<sup>a</sup> Ion Ghiviriga,<sup>a</sup> Khalil A. Abboud,<sup>a</sup> Kirk S. Schanze,<sup>c</sup> Christian Ehm,<sup>\*b</sup> Adam S. Veige.<sup>\*a</sup>

- a. University of Florida, Department of Chemistry, Center for Catalysis, P.O. Box 117200, Gainesville, FL, 32611.
- b. Dipartimento di Scienze Chimiche, Università di Napoli Federico II, Via Cintia, 80126 Napoli, Italy.
- c. University of Texas at San Antonio, Department of Chemistry, One UTSA Circle, San Antonio, TX 78249.

Corresponding Authors

\* E-mail: [veige@chem.ufl.edu](mailto:veige@chem.ufl.edu)

E-mail: [christian.ehm@unina.it](mailto:christian.ehm@unina.it)

## Table of Contents

|                                                                                                                                      |    |
|--------------------------------------------------------------------------------------------------------------------------------------|----|
| 1. Syntheses, NMR and X-ray Crystallography Data .....                                                                               | 3  |
| 1.1 General Considerations .....                                                                                                     | 3  |
| 1.2 Synthesis of <b>AuN<sub>1</sub></b> and <b>AuN<sub>2</sub></b> .....                                                             | 5  |
| 1.3 X-Ray Crystallography of <b>AuN<sub>1</sub></b> .....                                                                            | 8  |
| 1.4 Synthesis of <b>WN<sub>2</sub></b> .....                                                                                         | 11 |
| 1.5 X-Ray Crystallography of <b>WN<sub>2</sub></b> .....                                                                             | 14 |
| 1.6 Synthesis of <b>Re-N<sub>3</sub></b> , <b>ReN<sub>1</sub></b> , and <b>ReN<sub>2</sub></b> .....                                 | 16 |
| 1.7 X-Ray Crystallography of <b>ReN<sub>2</sub></b> .....                                                                            | 21 |
| 1.8 Synthesis of <b>Pt(II)-N<sub>3</sub></b> , <b>Pt(IV)-N<sub>3</sub></b> , and <b>Pt(IV)N<sub>2</sub></b> .....                    | 23 |
| 1.9 X-Ray Crystallography of <b>Pt(IV)-N<sub>3</sub></b> .....                                                                       | 27 |
| 1.10 X-Ray Crystallography of <b>Pt(IV)N<sub>2</sub></b> .....                                                                       | 31 |
| 2. Supplementary Computational Data .....                                                                                            | 33 |
| 2.1 Computational Details .....                                                                                                      | 33 |
| 2.2 Comparison between X-Ray and Calculated Structures .....                                                                         | 35 |
| 2.3 FMO Interaction energies .....                                                                                                   | 36 |
| 2.4 SambVCA % Buried Volume (% $V_{bur}$ ) of <b>M-N<sub>3</sub></b> .....                                                           | 38 |
| 2.5 SambVCA Steric Map of <b>(PtN<sub>3</sub>)<sub>4</sub></b> and <b>Pt(CH<sub>3</sub>)<sub>3</sub>N<sub>3</sub></b> .....          | 38 |
| 2.6 SambVCA Steric Map of <b>Pt(IV)-N<sub>3</sub></b> 's Reacting Azide .....                                                        | 39 |
| 2.7 Comparison of Potential Energy Surfaces of <b>Ru-N<sub>3</sub></b> and <b>RuP(CH<sub>3</sub>)<sub>3</sub>N<sub>3</sub></b> ..... | 39 |
| 2.7 Energy Tables of SPAAC iClick Reactivity .....                                                                                   | 40 |
| 2.8 Relative Enthalpies and Gibbs Free Energies of SPAAC iClick Reactivity .....                                                     | 52 |
| 2.9 Functional Comparison of % $V_{bur}$ vs. $\Delta G^\ddagger$ .....                                                               | 58 |
| 2.10 Effect of Solvent optimization on <b>Au-N<sub>3</sub></b> Energies .....                                                        | 60 |
| 3. References .....                                                                                                                  | 61 |

# 1. Syntheses, NMR and X-ray Crystallography Data

## 1.1 General Considerations

All manipulations were set up under an inert atmosphere using standard Schlenk or glove-box techniques for convenience; however, the compounds are worked up using benchtop technique and are stable in air. Pentane, benzene, and tetrahydrofuran (THF) were degassed by sparging with high purity argon and were dried using a GlassContour drying column. Methanol was dried over anhydrous copper(II) sulfate, distilled and stored over 4 Å molecular sieves; benzene- $d_6$  ( $C_6D_6$ ) (Cambridge Isotopes) was dried over sodium benzophenone ketyl, distilled, and stored over 4 Å molecular sieves; chloroform- $d$  (Cambridge Isotopes) was dried over calcium hydride, distilled, and stored over 4 Å molecular sieves. Dimethylsulfoxide- $d_6$  (DMSO- $d_6$ ) (Cambridge Isotopes) and acetone was dried over 4 Å molecular sieves for 24 h before use. NMR spectra were recorded on Varian Mercury 300 MHz, Bruker Ascend HD III 400 and 600 MHz spectrometers. 2D NMR spectra were obtained on a Bruker 400 and 600 MHz spectrometer. Chemical shifts are reported in  $\delta$  (ppm). The values for  $\Xi$  ( $X_i$ , the frequency ratio of the nucleus) ( $^1H$  100.00000%;  $^{13}C$  25.145020%;  $^{15}N$  10.132912%) correspond to TMS scale for  $^1H$  and  $^{13}C$  and liquid ammonia scale for  $^{15}N$ .  $^{31}P\{^1H\}$  spectra were referenced to an 85% phosphoric acid external standard (0 ppm). ESI-MS analysis was performed at Mass Spectrometry Research and Education Center, at the Chemistry Department at the University of Florida, FL. Elemental analyses were performed at the CENTC Elemental Analysis Facility, Department of Chemistry, University of Rochester and their compositions were determined with a PerkinElmer 2400 Series II Analyzer. X-Ray intensity data were collected at 100 K on a Bruker Dual micro source D8 Venture diffractometer using Mo  $K\alpha$  radiation ( $\lambda = 0.71073$  Å) and the crystal structure was refined using full-matrix least-squares refinement.<sup>1</sup>

The following were prepared by literature methods: cyclooctyne,<sup>2</sup>  $[Au(N_3)(PPh_3)]$  (**Au-N<sub>3</sub>**),<sup>3</sup>  $[W(\eta^3\text{-allyl})(N_3)(bpy)(CO)_2]$  (**W-N<sub>3</sub>**),<sup>4</sup>  $[ReCl(bpy)(CO)_3]$ ,<sup>5</sup>  $[Ru(N_3)$

(Tp)(PPh<sub>3</sub>)<sub>2</sub>] (**Ru-N<sub>3</sub>**) [Tp = tris(pyrazolyl)borate],<sup>6</sup> [Pt(N<sub>3</sub>)(CH<sub>3</sub>)<sub>3</sub>] (**PtN<sub>3</sub>**)<sub>4</sub>.<sup>7</sup> [Pt(N<sub>3</sub>)(CH<sub>3</sub>)(P<sup>i</sup>Pr<sub>3</sub>)<sub>2</sub>] (**Pt(II)-N<sub>3</sub>**) was synthesized via a slightly adjusted literature procedure.<sup>8</sup>

**Caution!** Azides and azido complexes are potentially explosive. Reactions should be performed only on a small scale until avoiding heat until stability can be verified.

## 1.2 Synthesis of **Au<sub>N1</sub>** and **Au<sub>N2</sub>**

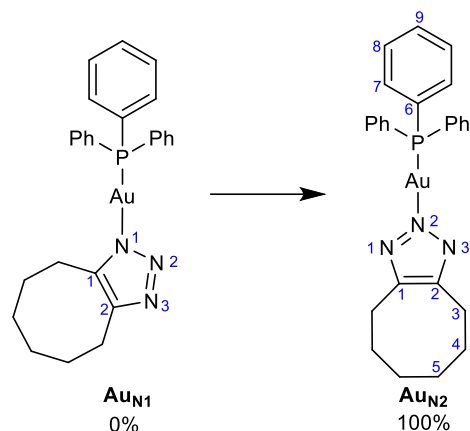

Cyclooctyne (6.5 mg, 0.060 mmol) and **Au-N<sub>3</sub>** (25.1 mg, 0.0500 mmol) were added into 2 mL of THF. The solution was added to a sealable tube, and the product formation was monitored via <sup>31</sup>P NMR spectroscopy. After 48 h, the solvent was removed *in vacuo*, and the precipitate was collected and washed with pentane to give a mixture of **Au<sub>N1</sub>** and **Au<sub>N2</sub>** product. Crystals were grown through pentane diffusion into a THF solution of the triazolene mixture at -25 °C to obtain complex **Au<sub>N1</sub>** as pale-yellow crystals. The complex **Au<sub>N1</sub>** eventually isomerized into 100% **Au<sub>N2</sub>** in solution. 94% Yield of **Au<sub>N2</sub>** (28.7 mg, 0.0471 mmol). <sup>1</sup>H NMR (400 MHz, CDCl<sub>3</sub>): δ 7.50 (m, 15H, C<sub>7</sub>-H, C<sub>8</sub>-H and C<sub>9</sub>-H), 2.90 (dd, <sup>3</sup>J<sub>HH</sub> = 3.6 Hz, <sup>4</sup>J<sub>HH</sub> = 1.2 Hz, 4H, C<sub>3</sub>-H), 1.75 (s, 4H, C<sub>4</sub>-H), 1.47 (s, 4H, C<sub>5</sub>-H). <sup>13</sup>C NMR (101 MHz, CDCl<sub>3</sub>): δ 142.7 (s, C<sub>1</sub> and C<sub>2</sub>), 134.2 (d, <sup>3</sup>J<sub>CP</sub> = 12 Hz, C<sub>8</sub>), 132.0 (d, <sup>4</sup>J<sub>CP</sub> = 14 Hz, C<sub>9</sub>), 129.3 (d, <sup>2</sup>J<sub>CP</sub> = 3 Hz, C<sub>7</sub>), 128.5 (d, <sup>1</sup>J<sub>CP</sub> = 62 Hz, C<sub>6</sub>), 28.8 (C<sub>4</sub>), 25.7 (C<sub>5</sub>), 24.3 (C<sub>3</sub>). <sup>31</sup>P NMR (121 MHz, CDCl<sub>3</sub>): δ 33.3. ESI-MS: m/z calculated for C<sub>26</sub>H<sub>27</sub>AuN<sub>3</sub>P [M+H]<sup>+</sup> 610.1686, found 610.1697.

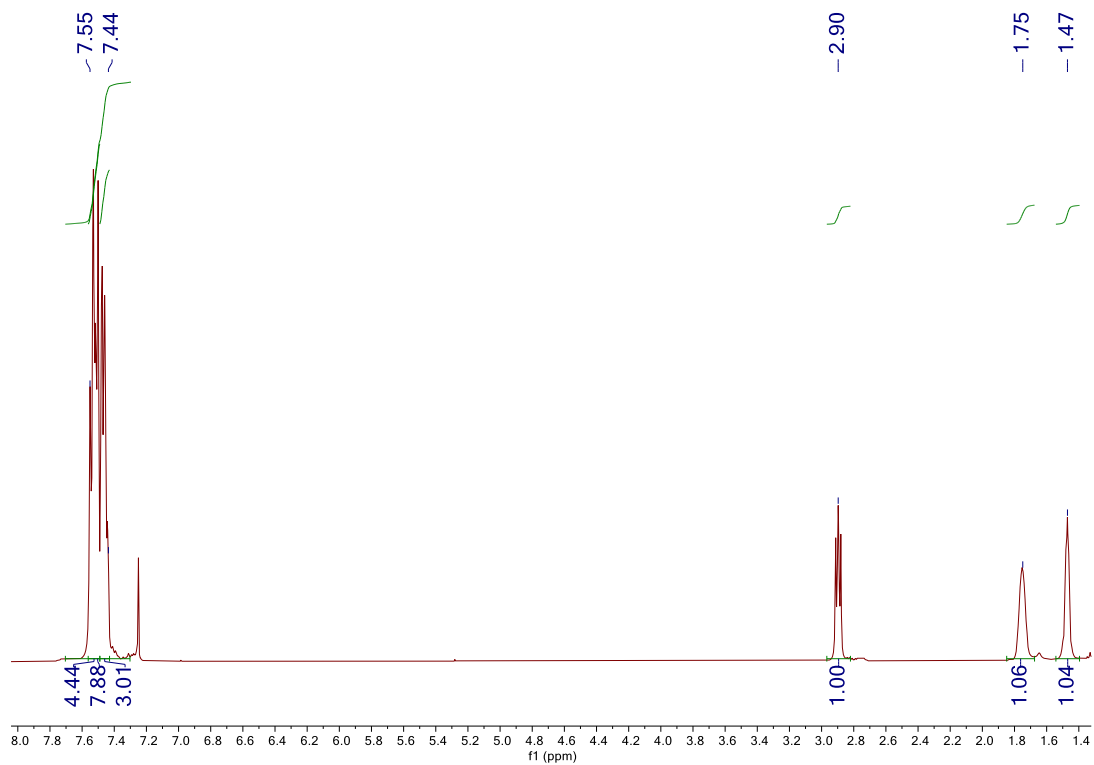

Figure S1.  $^1\text{H}$  NMR spectrum of  $\text{AuN}_2$  ( $\text{CDCl}_3$ , 400 MHz, 25 °C).

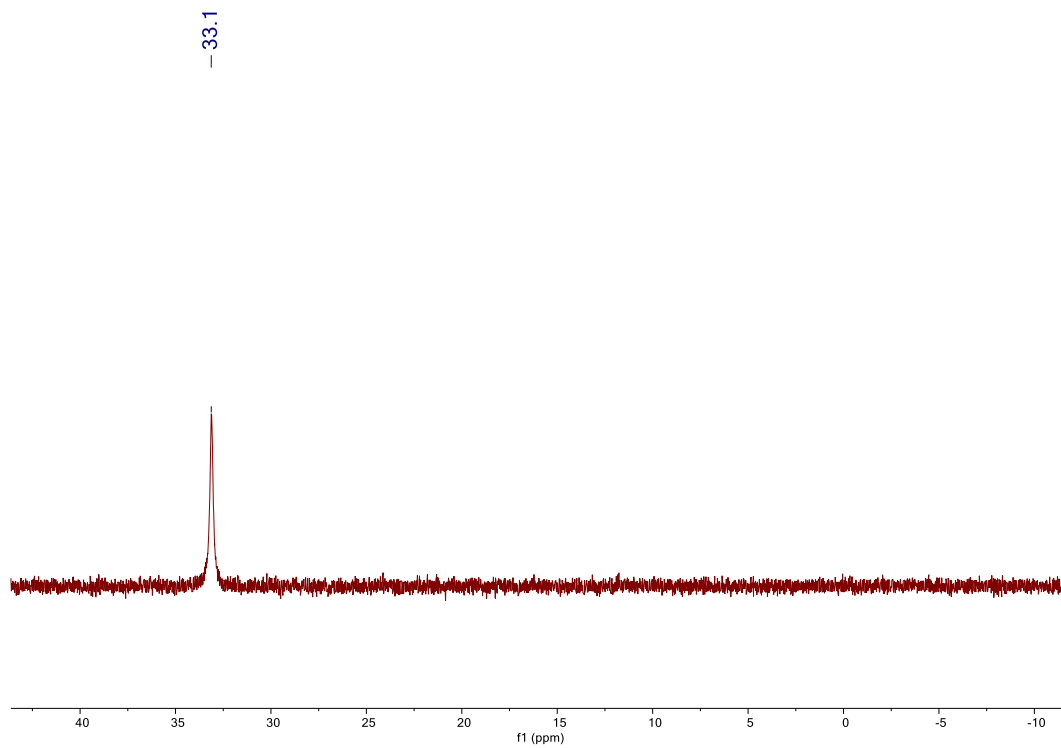

Figure S2.  $^{31}\text{P}\{^1\text{H}\}$  NMR spectrum of  $\text{AuN}_2$  ( $\text{CDCl}_3$ , 121 MHz, 25 °C).

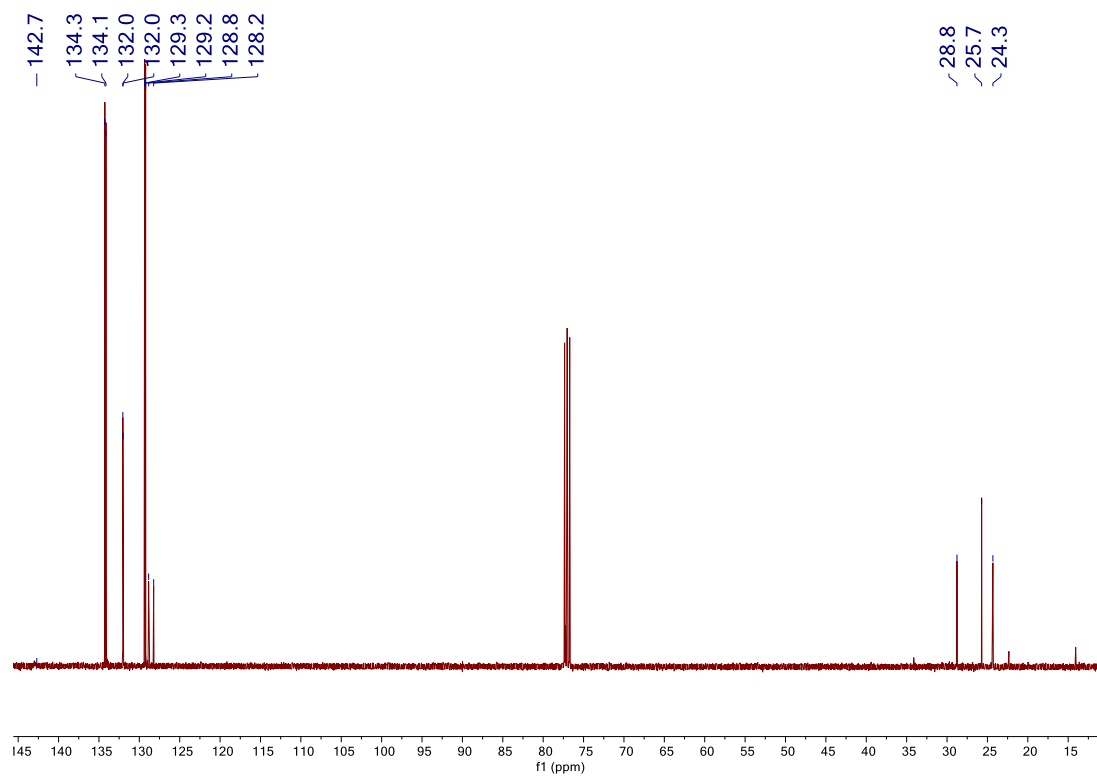

**Figure S3.** <sup>13</sup>C NMR spectrum of AuN<sub>2</sub> (CDCl<sub>3</sub>, 400 MHz, 25 °C).

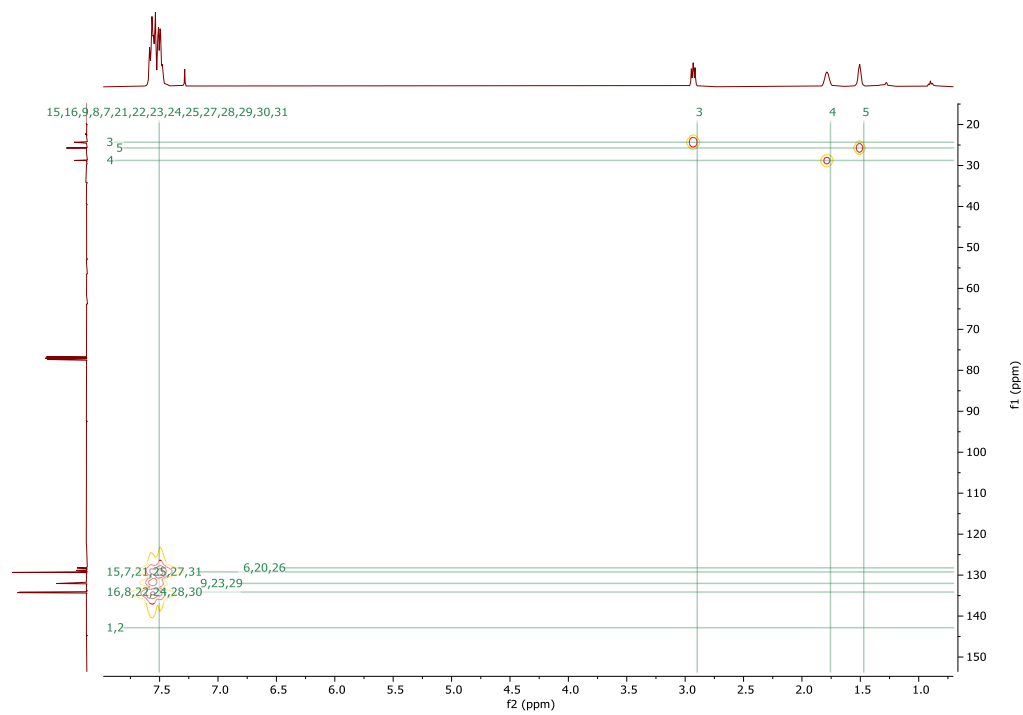

**Figure S4.** <sup>1</sup>H-<sup>13</sup>C gHSQC spectrum of AuN<sub>2</sub> (CDCl<sub>3</sub>, 400 MHz, 25 °C).

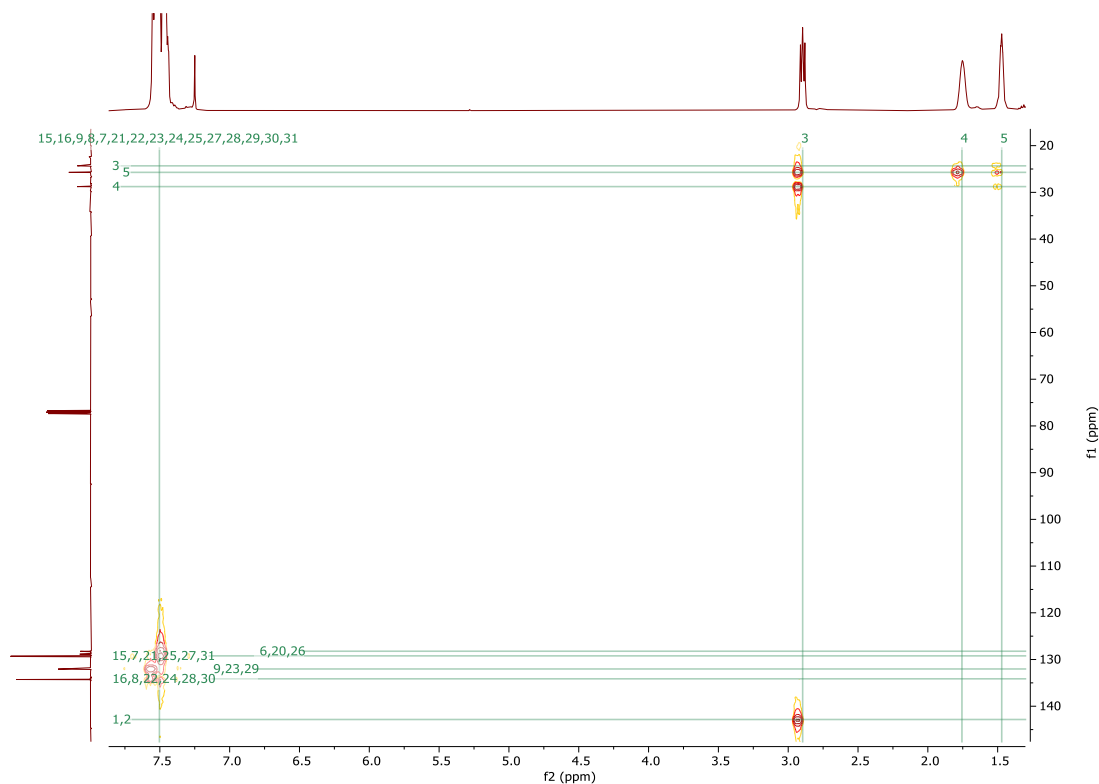

**Figure S5.**  $^1\text{H}$ - $^{13}\text{C}$  gHBMC spectrum of  $\text{AuN}_2$  ( $\text{CDCl}_3$ , 400 MHz, 25 °C).

### 1.3 X-Ray Crystallography of $\text{AuN}_1$

X-Ray Intensity data were collected at 100 K on a Bruker Dual micro source D8 Venture diffractometer and PHOTON III detector running APEX3 software package of programs and using Mo  $K\alpha$  radiation ( $\lambda = 0.71073 \text{ \AA}$ ). The data frames were integrated, and multi-scan scaling was applied in APEX3. Intrinsic phasing structure solution provided all of the non-H atoms.

The structure was refined using full-matrix least-squares refinement.<sup>1</sup> The non-H atoms were refined with anisotropic displacement parameters and all of the H atoms were calculated in idealized positions and refined riding on their parent atoms. The Au complex has one of the phenyl rings disordered and refined in two parts with their site occupation factors dependently refined to 0.75(1) and 0.25(1), respectively. A major disorder is observed in the C8 ring. Only C41 and C42 are not disordered while the rest of the ring, C43-C48, is disordered and refined in three parts. The site occupation factors of the three parts of C43-C48 disordered parts are dependently refined using SUMP; refined to 0.46(1), 0.24(1 and 0.30(1). In the final cycle of refinement, 8150 reflections (of which



7065 are observed with  $I > 2 \sigma(I)$ ) were used to refine 251 parameters and the resulting  $R_1$ ,  $wR_2$  and  $S$  (goodness of fit) were 4.32%, 9.44% and 1.114, respectively. The refinement was carried out by minimizing the  $wR_2$  function using  $F^2$  rather than  $F$  values.  $R_1$  is calculated to provide a reference to the conventional  $R$  value but its function is not minimized.

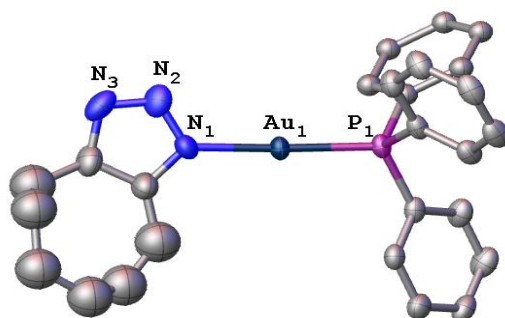

**Figure S6.** Molecular structure of  $\text{Au}_{\text{N1}}$  (Hydrogen atoms removed for clarity).

**Table S1.** Crystal data and structure refinement for **Au<sub>N1</sub>**.

|                                         |                                                                                                                                         |
|-----------------------------------------|-----------------------------------------------------------------------------------------------------------------------------------------|
| <b>CCDC Number</b>                      | <b>2068053</b>                                                                                                                          |
| <b>Empirical formula</b>                | C <sub>26</sub> H <sub>27</sub> AuN <sub>3</sub> P                                                                                      |
| <b>Formula weight</b>                   | 609.44                                                                                                                                  |
| <b>Temperature</b>                      | 100(2) K                                                                                                                                |
| <b>Wavelength</b>                       | 0.71073 Å                                                                                                                               |
| <b>Crystal system</b>                   | Monoclinic                                                                                                                              |
| <b>Space group</b>                      | <i>P</i> 2 <sub>1</sub> / <i>n</i>                                                                                                      |
| <b>Unit cell dimensions</b>             | <i>a</i> = 12.2089(6) Å, <i>α</i> = 90°.<br><i>b</i> = 14.1145(7) Å, <i>β</i> = 94.635(2)°.<br><i>c</i> = 13.2833(7) Å, <i>γ</i> = 90°. |
| <b>Volume</b>                           | 2281.5(2) Å <sup>3</sup>                                                                                                                |
| <b>Z</b>                                | 4                                                                                                                                       |
| <b>Density (calculated)</b>             | 1.774 Mg/m <sup>3</sup>                                                                                                                 |
| <b>Absorption coefficient</b>           | 6.537 mm <sup>-1</sup>                                                                                                                  |
| <b>F(000)</b>                           | 1192                                                                                                                                    |
| <b>Crystal size</b>                     | 0.322 x 0.163 x 0.152 mm <sup>3</sup>                                                                                                   |
| <b>Theta range for data collection</b>  | 2.210 to 33.273°.                                                                                                                       |
| <b>Index ranges</b>                     | -18 ≤ <i>h</i> ≤ 18, -21 ≤ <i>k</i> ≤ 20, -19 ≤ <i>l</i> ≤ 20                                                                           |
| <b>Reflections collected</b>            | 70033                                                                                                                                   |
| <b>Independent reflections</b>          | 8150 [R(int) = 0.0514]                                                                                                                  |
| <b>Completeness to theta = 25.242°</b>  | 99.6 %                                                                                                                                  |
| <b>Absorption correction</b>            | "multi-scan"                                                                                                                            |
| <b>Max. and min. transmission</b>       | 0.5316 and 0.3341                                                                                                                       |
| <b>Refinement method</b>                | Full-matrix least-squares on F <sup>2</sup>                                                                                             |
| <b>Data / restraints / parameters</b>   | 8150 / 104 / 251                                                                                                                        |
| <b>Goodness-of-fit on F<sup>2</sup></b> | 1.114                                                                                                                                   |
| <b>Final R indices [I &gt; 2σ(I)]</b>   | R <sub>1</sub> = 0.0432, wR <sub>2</sub> = 0.0944 [7065]                                                                                |
| <b>R indices (all data)</b>             | R <sub>1</sub> = 0.0517, wR <sub>2</sub> = 0.0979                                                                                       |
| <b>Largest diff. peak and hole</b>      | 2.575 and -1.610 e.Å <sup>-3</sup>                                                                                                      |

## 1.4 Synthesis of **W<sub>N2</sub>**

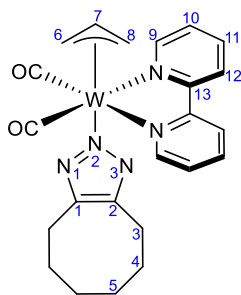

Cyclooctyne (6.5 mg, 0.060 mmol), **W-N<sub>3</sub>** (24.0 mg, 0.0500 mmol), and 2 mL of DMSO-*d*<sub>6</sub> were added to a sealable tube and the product formation was monitored via <sup>1</sup>H NMR spectroscopy. After 3 days, the reaction solution was poured into 20 mL benzene and extracted with water several times in order to remove the DMSO. The organic layer was dried over MgSO<sub>4</sub>, and the solvent was removed *in vacuo* to obtain a hickory-colored powder. Crystals were grown through pentane diffusion into an acetone solution of the triazolite at -25 °C. 59% Yield (17.2 mg, 0.0292 mmol). <sup>1</sup>H NMR (400 MHz, DMSO-*d*<sub>6</sub>): δ 8.70 (dd, 2H, <sup>3</sup>J<sub>HH</sub> = 5.5 Hz, <sup>4</sup>J<sub>HH</sub> = 1.6 Hz, C<sub>9</sub>-H), 8.59 (d, 2H, <sup>3</sup>J<sub>HH</sub> = 8.2 Hz, C<sub>12</sub>-H), 8.19 (td, 2H, <sup>3</sup>J<sub>HH</sub> = 7.9 Hz, <sup>3</sup>J<sub>HH</sub> = 1.6 Hz, C<sub>11</sub>-H), 7.54 (ddd, 2H, <sup>3</sup>J<sub>HH</sub> = 7.2 Hz, <sup>3</sup>J<sub>HH</sub> = 5.4 Hz, <sup>4</sup>J<sub>HH</sub> = 1.2 Hz, C<sub>10</sub>-H), 2.99 (d, 2H, <sup>3</sup>J<sub>HH</sub> = 6.2 Hz, C<sub>6</sub>-H<sub>syn</sub>, C<sub>8</sub>-H<sub>syn</sub>), 2.32 (m, 4H, C<sub>3</sub>-H), 2.21 (tt, 1H, <sup>3</sup>J<sub>HH</sub> = 8.6 Hz, <sup>3</sup>J<sub>HH</sub> = 6.1 Hz, C<sub>7</sub>-H), 1.53 (d, 2H, <sup>3</sup>J<sub>HH</sub> = 8.7 Hz, C<sub>6</sub>-H<sub>anti</sub>, C<sub>8</sub>-H<sub>anti</sub>), 1.32 (m, 4H, C<sub>4</sub>-H), 1.14 (m, 4H, C<sub>5</sub>-H). <sup>13</sup>C NMR (101 MHz, DMSO-*d*<sub>6</sub>): δ 223.0 (CO), 158.4 (C<sub>13</sub>), 151.5 (C<sub>9</sub>), 143.0 (C<sub>1</sub>, C<sub>2</sub>), 138.3 (C<sub>11</sub>), 127.4 (C<sub>10</sub>), 123.0 (C<sub>12</sub>), 66.2 (C<sub>7</sub>), 52.6 (C<sub>6</sub>, C<sub>8</sub>), 27.8 (C<sub>4</sub>), 25.5 (C<sub>5</sub>), 21.3 (C<sub>3</sub>). Anal.: Calc. for C<sub>23</sub>H<sub>25</sub>N<sub>5</sub>O<sub>2</sub>W: C, 47.04; H, 4.29; N, 11.92. Found: C, 45.83; H, 4.06; N, 11.49. ESI-MS: *m/z* calculated for C<sub>23</sub>H<sub>25</sub>N<sub>5</sub>O<sub>2</sub>W [M+H]<sup>+</sup> 588.1596, found 588.1566.

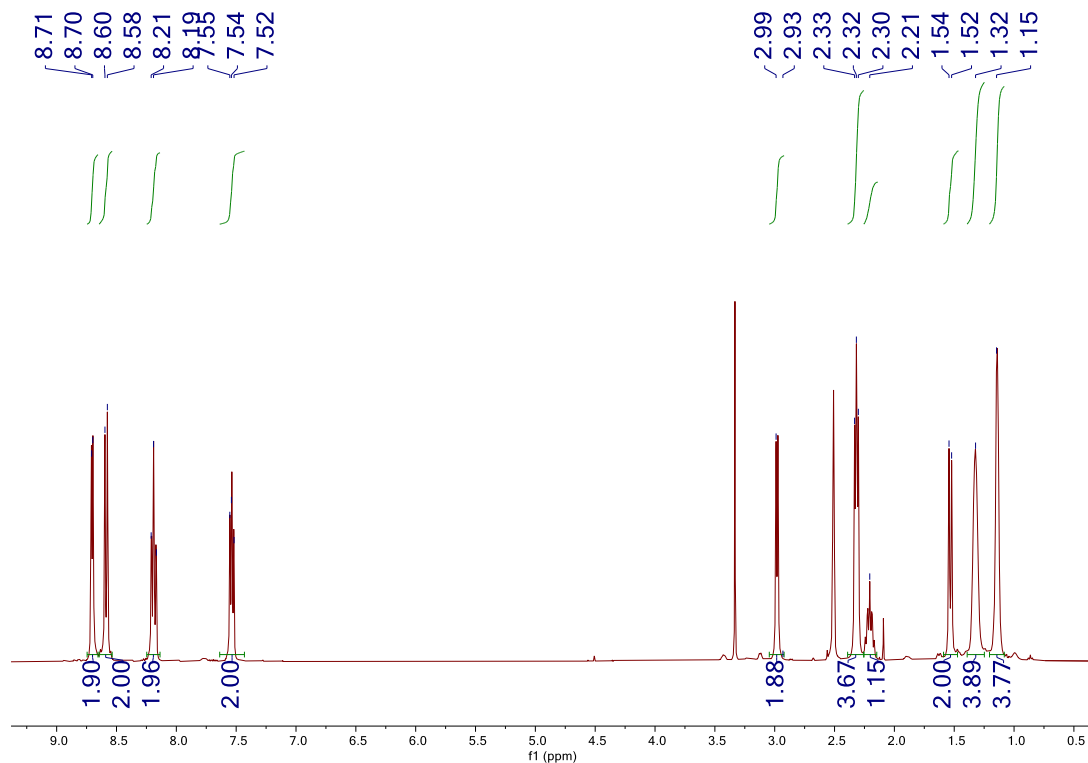

Figure S7.  $^1\text{H}$  NMR spectrum of  $\text{W}_{\text{N}_2}$  ( $\text{DMSO-}d_6$ , 400 MHz, 25 °C).

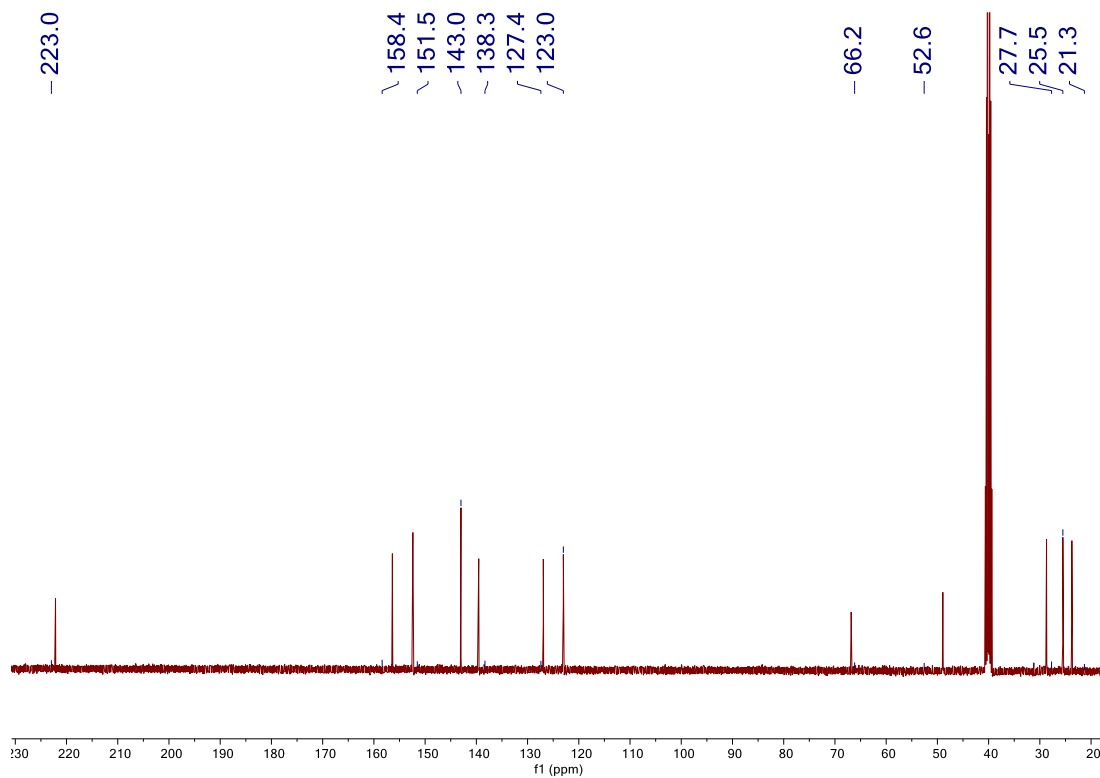

Figure S8.  $^{13}\text{C}$  NMR spectrum of  $\text{W}_{\text{N}_2}$  ( $\text{DMSO-}d_6$ , 101 MHz, 25 °C).

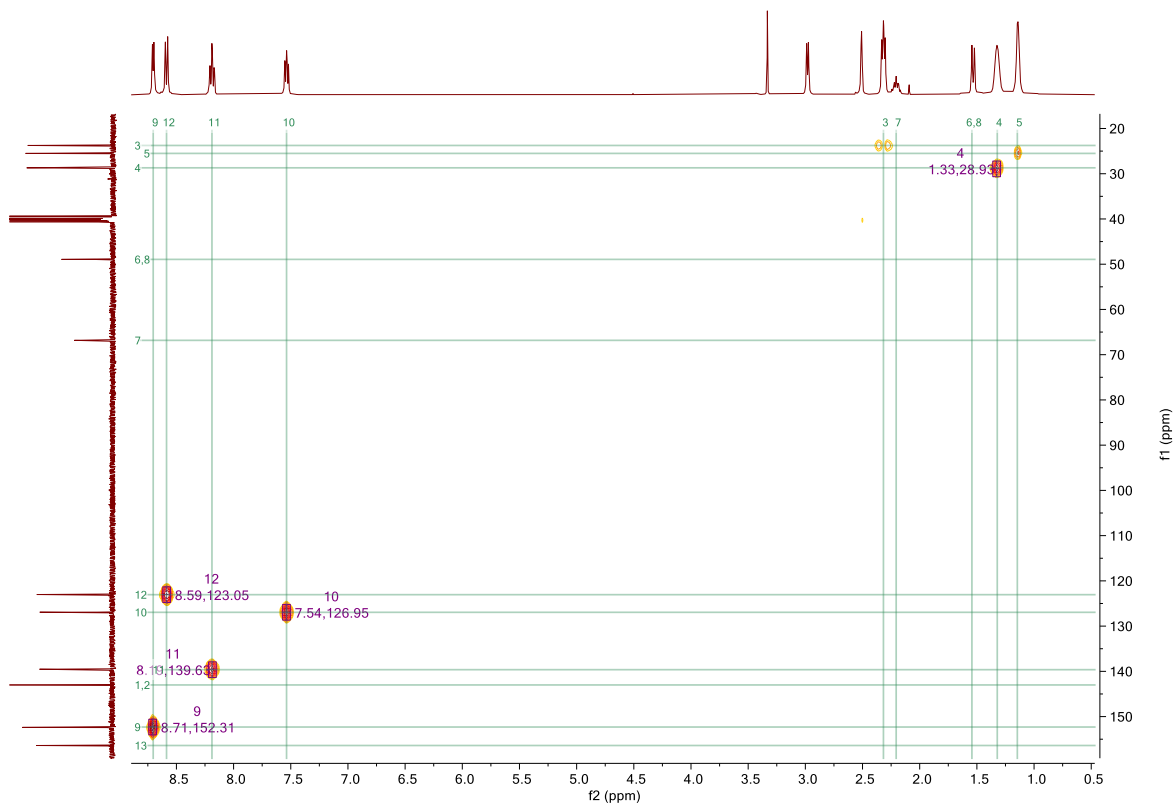

Figure S9.  $^1\text{H}$ - $^{13}\text{C}$  gHSQC spectrum of  $\text{W}_{\text{N}_2}$  (DMSO- $d_6$ , 400 MHz, 25 °C).

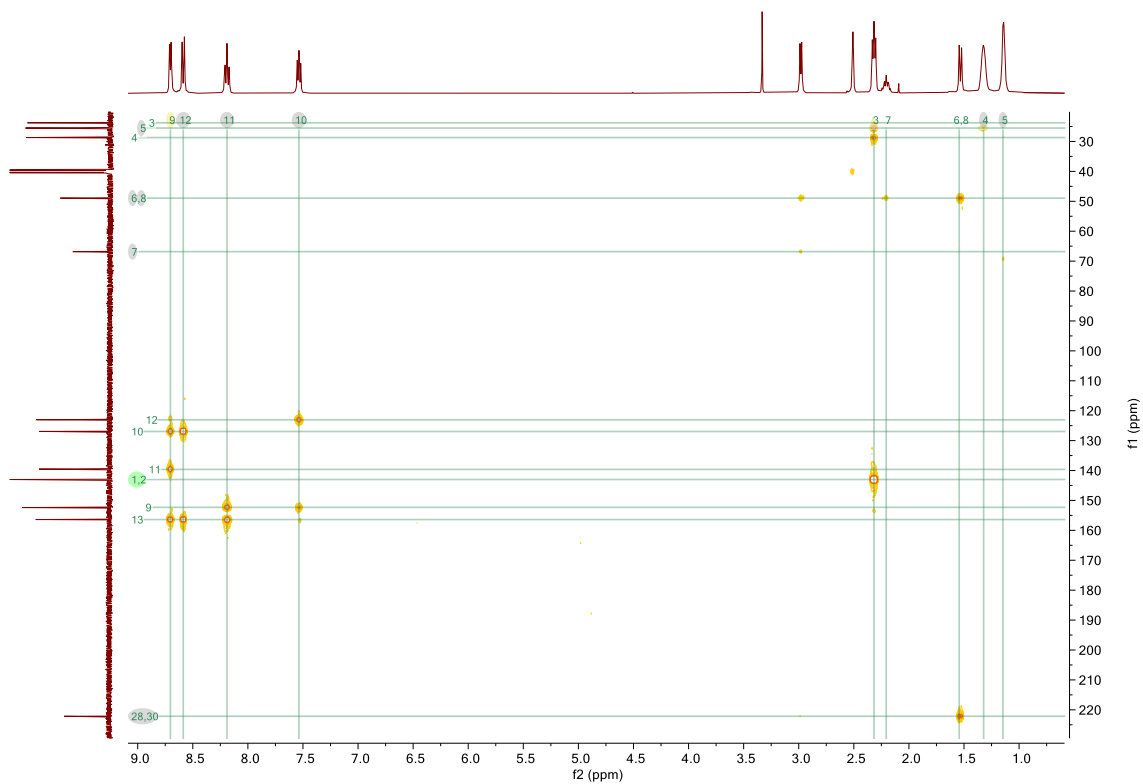

Figure S10.  $^1\text{H}$ - $^{13}\text{C}$  gHMBC spectrum of  $\text{W}_{\text{N}_2}$  (DMSO- $d_6$ , 400 MHz, 25 °C).

## 1.5 X-Ray Crystallography of **W<sub>N2</sub>**

X-Ray Intensity data were collected at 100 K on a Bruker Dual micro source D8 Venture diffractometer and PHOTON III detector running APEX3 software package of programs and using Mo K $\alpha$  radiation ( $\lambda = 0.71073 \text{ \AA}$ ). The data frames were integrated, and multi-scan scaling was applied in APEX3. Intrinsic phasing structure solution provided all of the non-H atoms.

The structure was refined using full-matrix least-squares refinement.<sup>1</sup> The non-H atoms were refined with anisotropic displacement parameters and all of the H atoms were calculated in idealized positions and refined riding on their parent atoms. The asymmetric unit consists of the W complex and an acetone solvent molecule. The complex has its oxygen atoms of the carbonyl groups disordered. The bipy group is disordered and refined in two parts. The group of C3-C8 is also disordered and similarly refined in two parts. Finally, the acetone solvent molecule is also disordered and refined in two parts. The structure exhibits all atoms refined anisotropically. In the final cycle of refinement, 8864 reflections (of which 7990 are observed with  $I > 2 \sigma(I)$ ) were used to refine 443 parameters and the resulting  $R_1$ ,  $wR_2$  and S (goodness of fit) were 2.92%, 5.70% and 1.208, respectively. The refinement was carried out by minimizing the  $wR_2$  function using  $F^2$  rather than F values.  $R_1$  is calculated to provide a reference to the conventional R value but its function is not minimized.

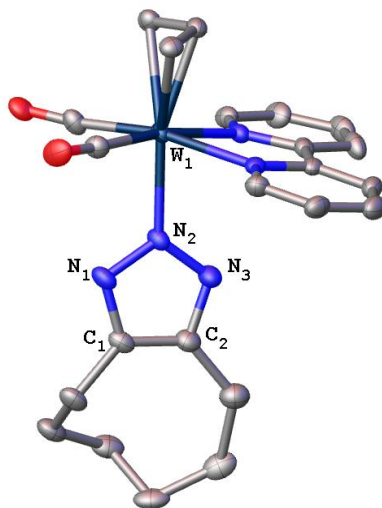

**Figure S11.** Molecular structure of **W<sub>N2</sub>** (Hydrogen atoms removed for clarity).

**Table S2.** Crystal data and structure refinement for **W<sub>N2</sub>**.

|                                         |                                                                                                                                        |
|-----------------------------------------|----------------------------------------------------------------------------------------------------------------------------------------|
| <b>CCDC Number</b>                      | <b>2068054</b>                                                                                                                         |
| <b>Empirical formula</b>                | C <sub>23</sub> H <sub>25</sub> N <sub>5</sub> O <sub>2</sub> W                                                                        |
| <b>Formula weight</b>                   | 587.33                                                                                                                                 |
| <b>Temperature</b>                      | 100(2) K                                                                                                                               |
| <b>Wavelength</b>                       | 0.71073 Å                                                                                                                              |
| <b>Crystal system</b>                   | Monoclinic                                                                                                                             |
| <b>Space group</b>                      | <i>P2<sub>1</sub>/n</i>                                                                                                                |
| <b>Unit cell dimensions</b>             | <i>a</i> = 13.915(3) Å, <i>α</i> = 90°.<br><i>b</i> = 11.0476(18) Å, <i>β</i> = 96.897(6)°.<br><i>c</i> = 16.410(4) Å, <i>γ</i> = 90°. |
| <b>Volume</b>                           | 2504.4(9) Å <sup>3</sup>                                                                                                               |
| <b>Z</b>                                | 4                                                                                                                                      |
| <b>Density (calculated)</b>             | 1.558 Mg/m <sup>3</sup>                                                                                                                |
| <b>Absorption coefficient</b>           | 4.639 mm <sup>-1</sup>                                                                                                                 |
| <b>F(000)</b>                           | 1152                                                                                                                                   |
| <b>Crystal size</b>                     | 0.043 x 0.092 x 0.182 mm <sup>3</sup>                                                                                                  |
| <b>Theta range for data collection</b>  | 1.815 to 32.763°.                                                                                                                      |
| <b>Index ranges</b>                     | -21 ≤ <i>h</i> ≤ 20, -16 ≤ <i>k</i> ≤ 16, -24 ≤ <i>l</i> ≤ 24                                                                          |
| <b>Reflections collected</b>            | 115078                                                                                                                                 |
| <b>Independent reflections</b>          | 8864 [R(int) = 0.0596]                                                                                                                 |
| <b>Completeness to theta = 25.242°</b>  | 100.0 %                                                                                                                                |
| <b>Absorption correction</b>            | None                                                                                                                                   |
| <b>Refinement method</b>                | Full-matrix least-squares on F <sup>2</sup>                                                                                            |
| <b>Data / restraints / parameters</b>   | 8864 / 1160 / 443                                                                                                                      |
| <b>Goodness-of-fit on F<sup>2</sup></b> | 1.208                                                                                                                                  |
| <b>Final R indices [I &gt; 2σ(I)]</b>   | R <sub>1</sub> = 0.0292, wR <sub>2</sub> = 0.0570 [7990]                                                                               |
| <b>R indices (all data)</b>             | R <sub>1</sub> = 0.0350, wR <sub>2</sub> = 0.0585                                                                                      |
| <b>Extinction coefficient</b>           | n/a                                                                                                                                    |
| <b>Largest diff. peak and hole</b>      | 1.149 and -0.891 e.Å <sup>-3</sup>                                                                                                     |

## 1.6 Synthesis of **Re-N<sub>3</sub>**, **Re<sub>N1</sub>**, and **Re<sub>N2</sub>**

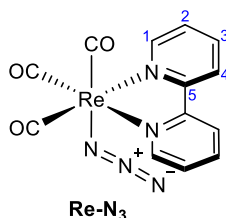

In a degassed mixture of THF:MeOH (1:1 v/v, 6 mL),  $\text{ReCl}(\text{bpy})(\text{CO})_3^5$  (46.2 mg, 0.100 mmol), silver triflate (77.1 mg, 0.300 mmol) was dissolved and  $\text{NaN}_3$  (65.0 mg, 1.00 mmol) was suspended as a heterogeneous mixture and then stirred for a day. After removing all volatiles *in vacuo* a yellow powder was obtained. The powder was washed with distilled water to remove the salts then redissolved in acetone, filtered, and all volatiles removed again to obtain a yellow powder. 59% Yield (27.8 mg, 0.0593 mmol).  $^1\text{H NMR}$  (400 MHz,  $\text{DMSO-}d_6$ )  $\delta$  9.05 (d, 2H,  $^3J_{\text{HH}} = 5.4$  Hz, C<sub>1</sub>-H), 8.83 (d, 2H,  $^3J_{\text{HH}} = 8.1$  Hz, C<sub>4</sub>-H), 8.38 (t, 2H,  $^3J_{\text{HH}} = 6.1$  Hz, C<sub>3</sub>-H), 7.80 (t, 2H,  $^3J_{\text{HH}} = 7.6$  Hz, C<sub>2</sub>-H).

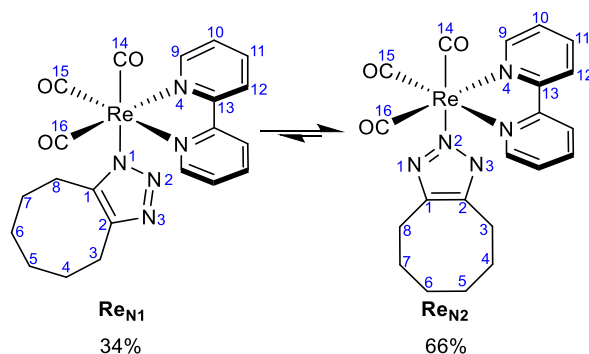

Cyclooctyne (6.5 mg, 0.060 mmol), **Re-N<sub>3</sub>** (23.4 mg, 0.0500 mmol), and 2 mL of  $\text{DMSO-}d_6$  were added to a sealable tube and the product formation was monitored via  $^1\text{H NMR}$  spectroscopy. After 8 days, 10 mL of distilled water was poured into the reaction solution and the resulting precipitate was filtered off from the colorless solution, washed with distilled water (10 mL) and pentane (10 mL), and all volatiles were removed *in vacuo* to yield a yellow solid. Crystals were grown through pentane diffusion into an acetone solution of the triazolate at  $-25$  °C. 87% Yield (25.1 mg, 0.0435 mmol).  $^1\text{H NMR}$  (600 MHz,  $\text{DMSO-}d_6$ )  $\delta$  major **Re<sub>N2</sub>** isomer: 9.06 (dd, 2H,  $^3J_{\text{HH}} = 5.4$  Hz,  $^4J_{\text{HH}} = 1.5$  Hz, C<sub>9</sub>-H), 8.62 (d, 2H,  $^3J_{\text{HH}} = 8.1$  Hz, C<sub>12</sub>-H), 8.27 (td, 2H,  $^3J_{\text{HH}} = 7.9$  Hz,  $^3J_{\text{HH}} = 1.6$  Hz, C<sub>11</sub>-H), 7.71 (ddd, 2H,  $^3J_{\text{HH}} = 7.2$  Hz,  $^3J_{\text{HH}} = 5.5$  Hz,  $^4J_{\text{HH}} = 1.4$  Hz, C<sub>10</sub>-H), 2.33 (m, 4H, C<sub>3</sub>-H, C<sub>8</sub>-H), 1.32 (m, 4H, C<sub>4</sub>-H, C<sub>7</sub>-H), 1.11 (p,  $^3J_{\text{HH}} = 2.6$  Hz, 4H, C<sub>5</sub>-H, C<sub>6</sub>-H);  $\delta$  minor **Re<sub>N1</sub>** isomer: 9.04



(dd,  $J = 5.4, 1.5$  Hz, 2H, C<sub>9</sub>-H), 8.72 (d, 2H,  $J = 8.1$  Hz, C<sub>12</sub>-H), 8.31 (td, 2H,  $J = 7.9, 1.6$  Hz, C<sub>11</sub>-H), 7.71 (ddd, 2H,  $J = 7.2, 5.5, 1.4$  Hz, C<sub>10</sub>-H), 2.76 (m, 2H, C<sub>8</sub>-H), 2.50 (m, 2H, C<sub>3</sub>-H), 1.51 (p,  $J = 6.4$  Hz, 2H, C<sub>7</sub>-H), 1.43 (d,  $J = 6.7$  Hz, 2H, C<sub>4</sub>-H), 1.28 (t,  $J = 5.6$  Hz, 2H, C<sub>6</sub>-H), 1.19 (d,  $J = 5.9$  Hz, 2H, C<sub>5</sub>-H). <sup>13</sup>C NMR (151 MHz, DMSO-*d*<sub>6</sub>):  $\delta$  major **Ren<sub>2</sub>** isomer: 198.9 (C<sub>15</sub>, C<sub>16</sub>), 195.7 (C<sub>14</sub>), 156.2 (C<sub>13</sub>), 153.7 (C<sub>9</sub>), 142.6 (C<sub>1</sub>, C<sub>2</sub>), 140.5 (C<sub>11</sub>), 128.0 (C<sub>10</sub>), 124.0 (C<sub>12</sub>), 28.9 (C<sub>4</sub>, C<sub>7</sub>), 25.5 (C<sub>5</sub>, C<sub>6</sub>), 23.8 (C<sub>3</sub>, C<sub>8</sub>);  $\delta$  minor **Ren<sub>1</sub>** isomer: 198.3 (C<sub>15</sub>, C<sub>16</sub>), 195.7 (C<sub>14</sub>), 156.6 (C<sub>13</sub>), 153.7 (C<sub>9</sub>), 141.4 (C<sub>1</sub>), 140.7 (C<sub>11</sub>), 140.6 (C<sub>2</sub>), 128.2 (C<sub>10</sub>), 124.3 (C<sub>12</sub>), 29.4 (C<sub>4</sub>), 28.6 (C<sub>7</sub>), 26.0 (C<sub>6</sub>), 25.4 (C<sub>5</sub>), 24.9 (C<sub>8</sub>), 24.3 (C<sub>3</sub>). <sup>15</sup>N NMR (61 MHz, DMSO-*d*<sub>6</sub>):  $\delta$  major **Ren<sub>2</sub>** isomer: 349.8 (N<sub>1</sub>, N<sub>3</sub>), 246.7 (N<sub>4</sub>);  $\delta$  minor **Ren<sub>1</sub>** isomer: 351.9 (N<sub>3</sub>), 267.1 (N<sub>1</sub>), 245.50 (N<sub>4</sub>). ESI-MS:  $m/z$  calculated for C<sub>21</sub>H<sub>20</sub>N<sub>5</sub>O<sub>3</sub>Re [M+H]<sup>+</sup> 578.1202, found 578.1203.

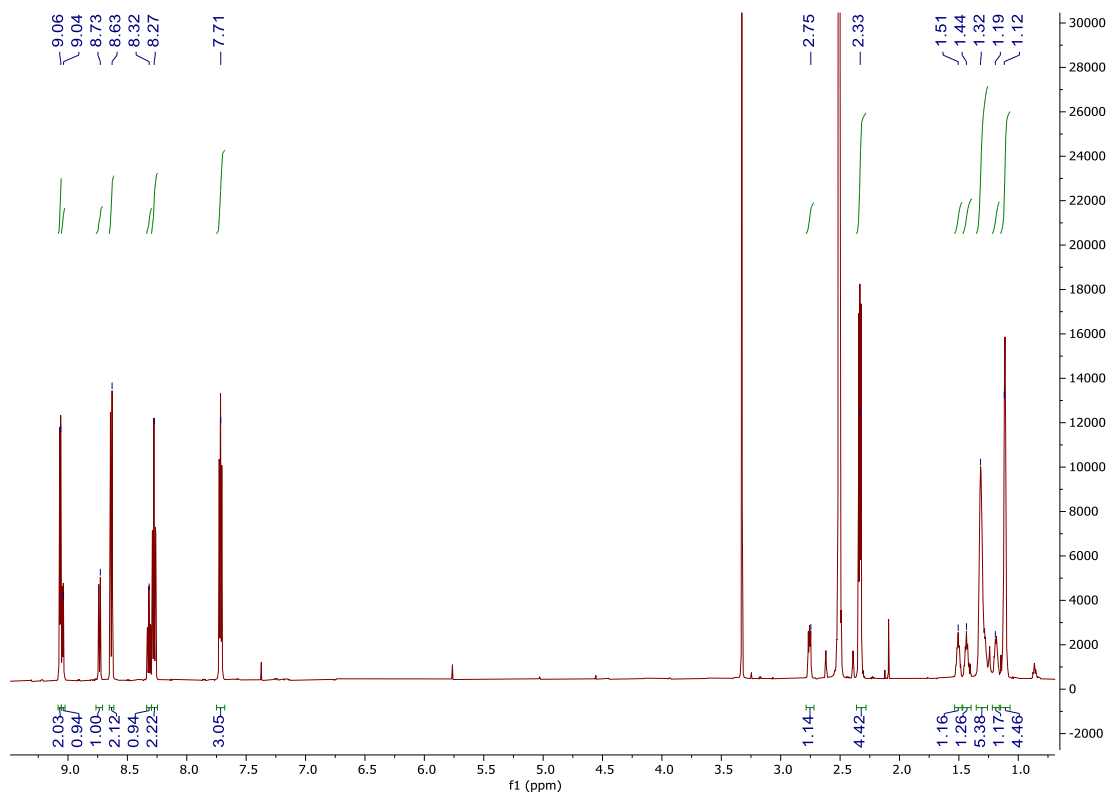

Figure S12.  $^1\text{H}$  NMR spectrum of  $\text{Re}_{\text{N}1}$  and  $\text{Re}_{\text{N}2}$  ( $\text{DMSO-}d_6$ , 600 MHz, 25 °C).

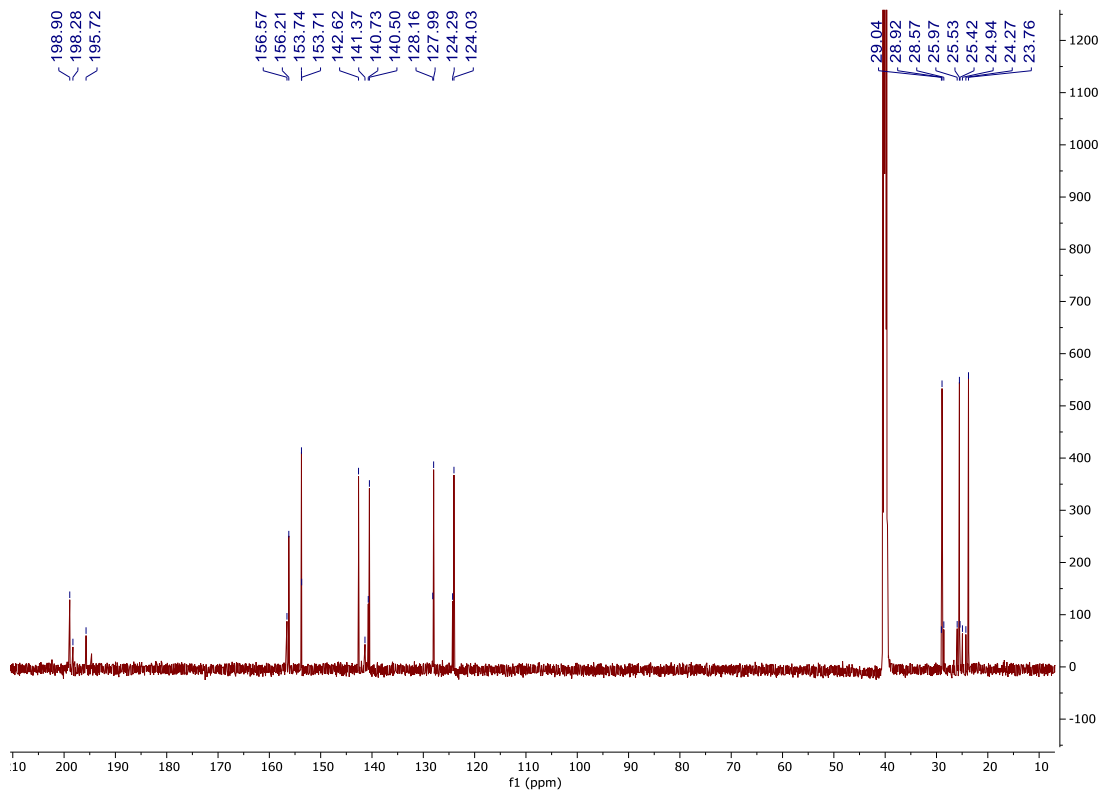

Figure S13.  $^{13}\text{C}$  NMR spectrum of  $\text{Re}_{\text{N}1}$  and  $\text{Re}_{\text{N}2}$  ( $\text{DMSO-}d_6$ , 151 MHz, 25 °C).

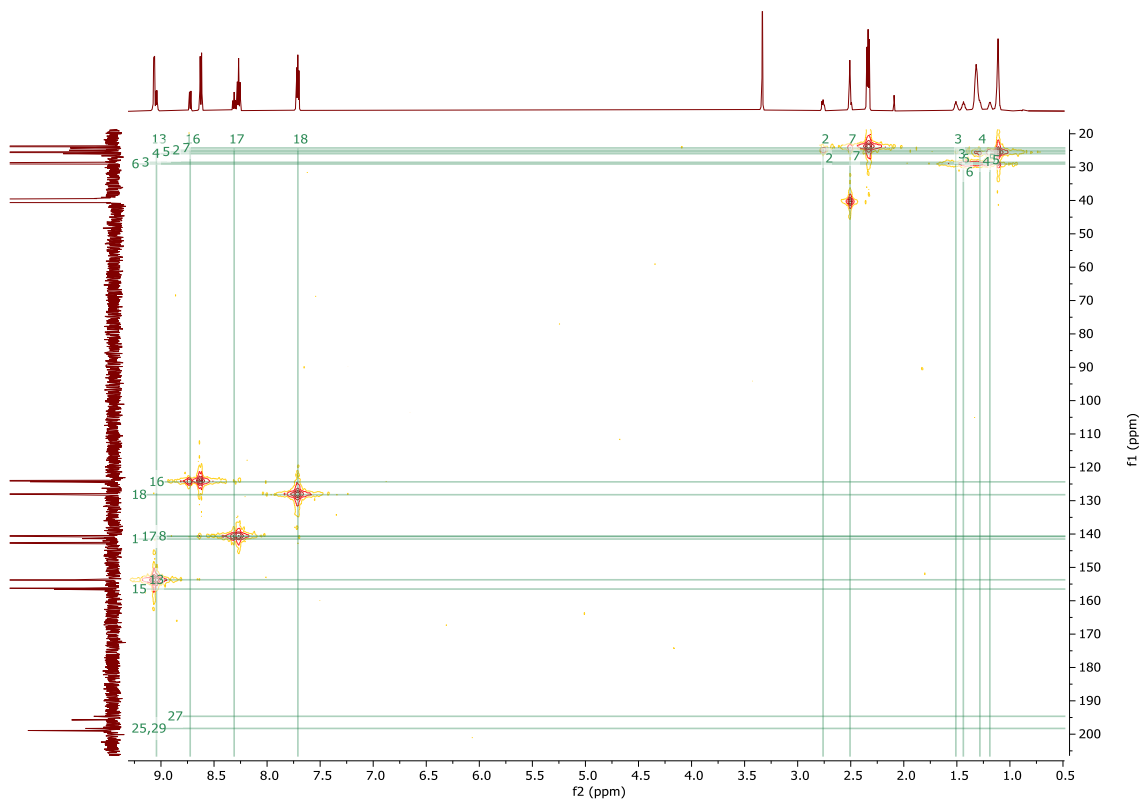

Figure S14.  $^1\text{H}$ - $^{13}\text{C}$  gHSQC spectrum of  $\text{Re}_{\text{N}1}$  and  $\text{Re}_{\text{N}2}$  ( $\text{DMSO-}d_6$ , 600 MHz, 25 °C).

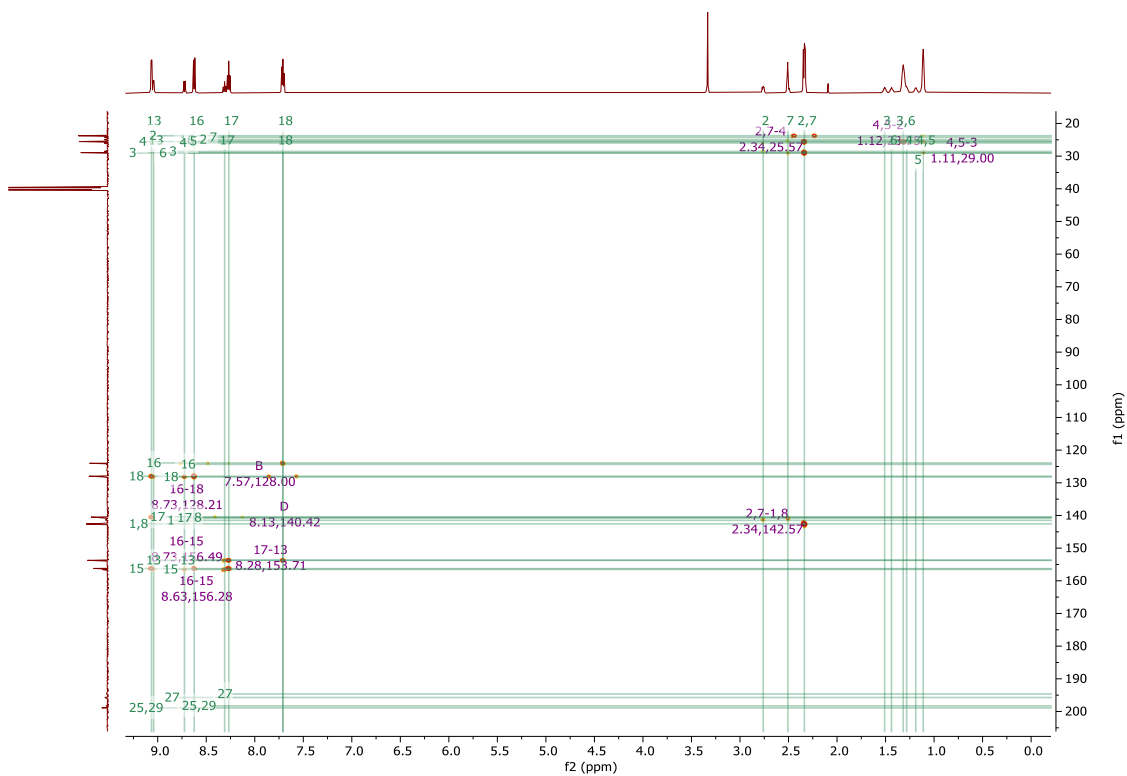

Figure S15.  $^1\text{H}$ - $^{13}\text{C}$  gHMBC spectrum of  $\text{Re}_{\text{N}1}$  and  $\text{Re}_{\text{N}2}$  ( $\text{DMSO-}d_6$ , 600 MHz, 25 °C).

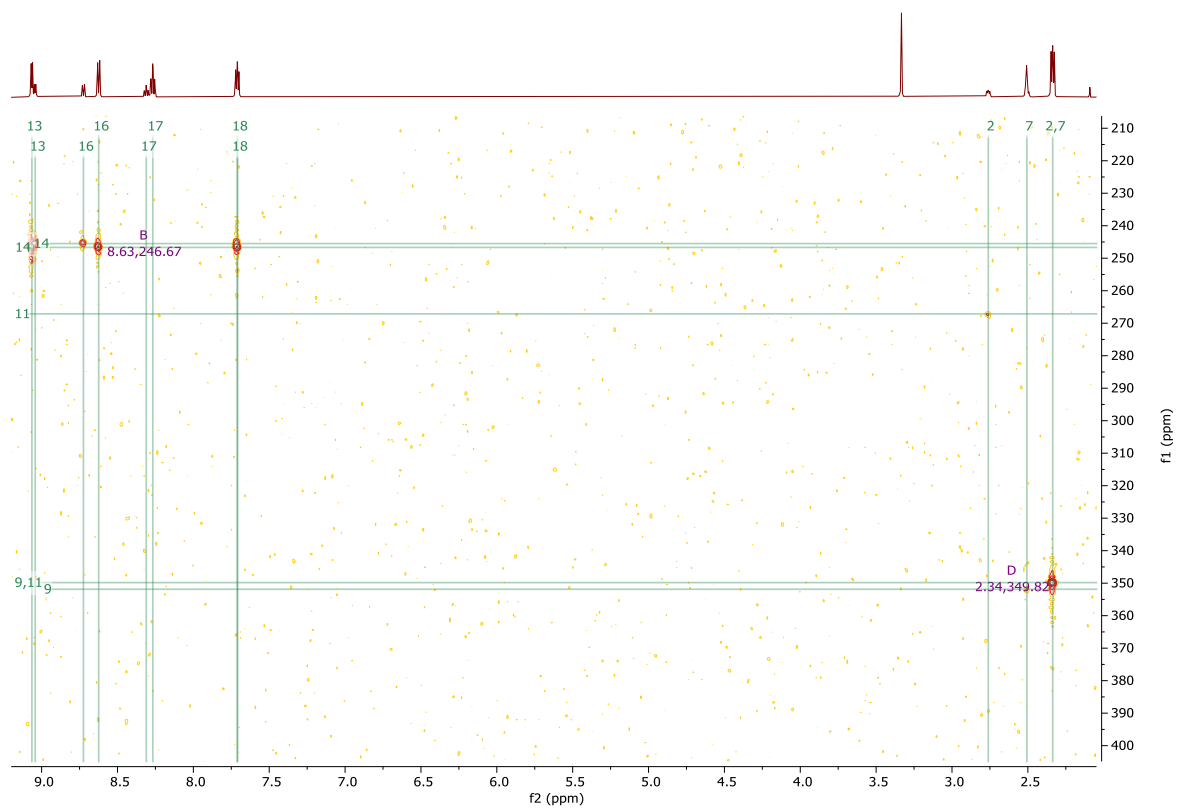

**Figure S16.**  $^1\text{H}$ - $^{15}\text{N}$  gHMBC spectrum of  $\text{Re}_{\text{N}1}$  and  $\text{Re}_{\text{N}2}$  (DMSO- $d_6$ , 600 MHz, 25 °C).

## 1.7 X-Ray Crystallography of $\text{Re}_{\text{N}_2}$

X-Ray Intensity data were collected at 100 K on a Bruker Dual micro source D8 Venture diffractometer and PHOTON III detector running APEX3 software package of programs and using Mo  $K\alpha$  radiation ( $\lambda = 0.71073 \text{ \AA}$ ). The data frames were integrated and multi-scan scaling was applied in APEX3. Intrinsic phasing structure solution provided the All of the non-H atoms.

The structure was refined using full-matrix least-squares.<sup>1</sup> The non-H atoms were refined with anisotropic displacement parameters and all of the H atoms were calculated in idealized positions and refined riding on their parent atoms. One oxygen atom of a carbonyl ligand is disordered and refined in two parts with their site occupations factors dependently refined. The C3-C8 part of the C8 ring is also disordered and also refined in two parts with their site occupation factors dependently refined. The equivalent bonds in the –C3-C8- part of the ring were constrained to stay geometrically equivalent using the SADI command lines. In the final cycle of refinement, 8592 reflections (of which 7613 are observed with  $I > 2\sigma(I)$ ) were used to refine 331 parameters and the resulting  $R_1$ ,  $wR_2$  and S (goodness of fit) were 2.62%, 5.78% and 1.088, respectively. The refinement was carried out by minimizing the  $wR_2$  function using  $F^2$  rather than F values.  $R_1$  is calculated to provide a reference to the conventional R value but its function is not minimized.

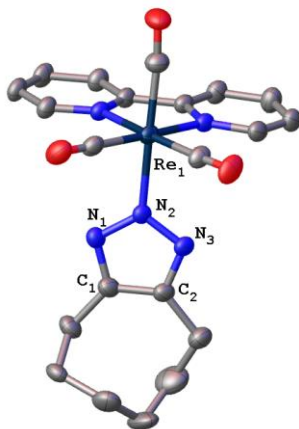

**Figure S17.** Molecular structure of  $\text{Re}_{\text{N}_2}$  (All hydrogen atoms removed for clarity).

**Table S3.** Crystal data and structure refinement for **Re<sub>N</sub>2**.

|                                                     |                                                                                                                                                    |
|-----------------------------------------------------|----------------------------------------------------------------------------------------------------------------------------------------------------|
| <b>CCDC Number</b>                                  | <b>2068055</b>                                                                                                                                     |
| <b>Empirical formula</b>                            | C <sub>21</sub> H <sub>20</sub> N <sub>5</sub> O <sub>3</sub> Re                                                                                   |
| <b>Formula weight</b>                               | 576.62                                                                                                                                             |
| <b>Temperature</b>                                  | 100(2) K                                                                                                                                           |
| <b>Wavelength</b>                                   | 0.71073 Å                                                                                                                                          |
| <b>Crystal system</b>                               | Triclinic                                                                                                                                          |
| <b>Space group</b>                                  | <i>P</i> -1                                                                                                                                        |
| <b>Unit cell dimensions</b>                         | <i>a</i> = 10.099(7) Å, $\alpha$ = 77.240(15)°.<br><i>b</i> = 10.839(6) Å, $\beta$ = 72.021(16)°.<br><i>c</i> = 11.962(9) Å, $\gamma$ = 85.85(2)°. |
| <b>Volume</b>                                       | 1214.7(14) Å <sup>3</sup>                                                                                                                          |
| <b>Z</b>                                            | 2                                                                                                                                                  |
| <b>Density (calculated)</b>                         | 1.576 Mg/m <sup>3</sup>                                                                                                                            |
| <b>Absorption coefficient</b>                       | 5.030 mm <sup>-1</sup>                                                                                                                             |
| <b>F(000)</b>                                       | 560                                                                                                                                                |
| <b>Crystal size</b>                                 | 0.343 x 0.070 x 0.034 mm <sup>3</sup>                                                                                                              |
| <b>Theta range for data collection</b>              | 1.926 to 33.181°.                                                                                                                                  |
| <b>Index ranges</b>                                 | -15 ≤ <i>h</i> ≤ 15, -16 ≤ <i>k</i> ≤ 16, -17 ≤ <i>l</i> ≤ 18                                                                                      |
| <b>Reflections collected</b>                        | 77811                                                                                                                                              |
| <b>Independent reflections</b>                      | 8592 [R(int) = 0.0451]                                                                                                                             |
| <b>Completeness to theta = 25.242°</b>              | 100.0 %                                                                                                                                            |
| <b>Absorption correction</b>                        | "Multi-Scan"                                                                                                                                       |
| <b>Refinement method</b>                            | Full-matrix least-squares on F <sup>2</sup>                                                                                                        |
| <b>Data / restraints / parameters</b>               | 8592 / 660 / 331                                                                                                                                   |
| <b>Goodness-of-fit on F<sup>2</sup></b>             | 1.088                                                                                                                                              |
| <b>Final R indices [<i>I</i> &gt; 2σ(<i>I</i>)]</b> | R <sub>1</sub> = 0.0262, wR <sub>2</sub> = 0.0578 [7613]                                                                                           |
| <b>R indices (all data)</b>                         | R <sub>1</sub> = 0.0328, wR <sub>2</sub> = 0.0607                                                                                                  |
| <b>Extinction coefficient</b>                       | n/a                                                                                                                                                |
| <b>Largest diff. peak and hole</b>                  | 2.374 and -1.877 e.Å <sup>-3</sup>                                                                                                                 |

## 1.8 Synthesis of Pt(II)-N<sub>3</sub>, Pt(IV)-N<sub>3</sub>, and Pt(IV)<sub>N2</sub>

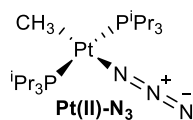

Pt(CH<sub>3</sub>)(P<sup>i</sup>Pr<sub>3</sub>)<sub>2</sub>(N<sub>3</sub>) (**Pt(II)-N<sub>3</sub>**) was synthesized via a slightly adjusted literature procedure.<sup>8</sup> Pt(CH<sub>3</sub>)<sub>3</sub>(N<sub>3</sub>) ((**PtN<sub>3</sub>**)<sub>4</sub>)<sup>7</sup> (141.1 mg, 0.5000 mmol) and P(P<sup>i</sup>Pr<sub>3</sub>)<sub>3</sub> (192.3 mg, 1.200 mmol) were dissolved in 5 mL toluene and heated at 80 °C for 2 h. The reaction solution was filtered and all volatiles removed *in vacuo* to obtain a white powder. The powder was further washed with pentane, then all volatiles were removed again to yield a white powder. 68% Yield (193.4 mg, 0.3377 mmol).

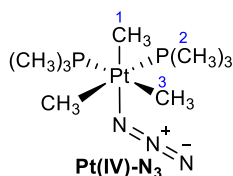

(**PtN<sub>3</sub>**)<sub>4</sub><sup>7</sup> (141.1 mg, 0.5000 mmol) and P(CH<sub>3</sub>)<sub>3</sub> (91.2 mg, 1.20 mmol) were dissolved in toluene (5 mL) and heated at 80 °C for 2 h. All volatiles were removed *in vacuo* to obtain a white powder. The powder was further washed with pentane then all volatiles were removed again to yield a white solid. Crystals were grown through pentane diffusion into a toluene solution of the azide at -25 °C. 60% Yield (130.3 mg, 0.2993 mmol). <sup>1</sup>H NMR (400 MHz, C<sub>6</sub>D<sub>6</sub>): δ 1.09 (m, 6H, C<sub>3</sub>-H), 0.78 (m, 18H, C<sub>2</sub>-H), 0.29 (tt, 3H, <sup>2</sup>J<sub>HPt</sub> = 67.8 Hz, <sup>3</sup>J<sub>HP</sub> = 7.8 Hz, C<sub>1</sub>-H). <sup>13</sup>C NMR (101 MHz, C<sub>6</sub>D<sub>6</sub>): δ 11.2 (m, C<sub>2</sub>), 6.7 (m, <sup>1</sup>J<sub>CPt</sub> = 513 Hz, <sup>2</sup>J<sub>CPtrans</sub> = 125 Hz, <sup>2</sup>J<sub>CPcis</sub> = 8 Hz, C<sub>3</sub>), -15.1 (tt, <sup>1</sup>J<sub>CPt</sub> = 615 Hz, <sup>2</sup>J<sub>CP</sub> = 3 Hz, C<sub>1</sub>). <sup>31</sup>P NMR (121 MHz, C<sub>6</sub>D<sub>6</sub>): δ -42.3. ESI-MS: m/z calculated for C<sub>9</sub>H<sub>27</sub>N<sub>3</sub>P<sub>2</sub>Pt [M+Na]<sup>+</sup> 457.1226, found 457.1209.

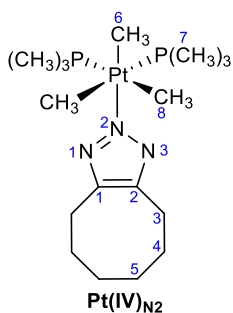

Cyclooctyne (32.4 mg, 0.300 mmol), **Pt(IV)-N<sub>3</sub>** (108.6 mg, 0.2500 mmol), and 2 mL of C<sub>6</sub>D<sub>6</sub> were added to a sealable tube. The tube was heated at 50 °C and the product

formation was monitored via  $^{31}\text{P}$  NMR spectroscopy. After 5 days, the reaction solution was filtered and all volatiles removed to obtain a white powder. The powder was further washed with cold pentane several times, then all volatiles were removed to yield a white solid. Colorless crystals were grown through cooling the pentane solution of the triazolate at  $-25\text{ }^\circ\text{C}$ . 13% Yield (17.6 mg, 0.0324 mmol).  $^1\text{H}$  NMR (400 MHz,  $\text{C}_6\text{D}_6$ ):  $\delta$  3.01 (t,  $^3J_{\text{HH}} = 4\text{ Hz}$ , 4H,  $\text{C}_3\text{-H}$ ), 1.75 (m, 4H,  $\text{C}_4\text{-H}$ ), 1.48 (m, 4H,  $\text{C}_5\text{-H}$ ), 1.38 (m, 6H,  $\text{C}_8\text{-H}$ ), 0.93 (m, 18H,  $\text{C}_7\text{-H}$ ), 0.33 (tt, 3H,  $^2J_{\text{HPt}} = 67.8\text{ Hz}$ ,  $^3J_{\text{HP}} = 7.8\text{ Hz}$ ,  $\text{C}_6\text{-H}$ ).  $^{13}\text{C}$  NMR (101 MHz,  $\text{C}_6\text{D}_6$ ):  $\delta$  142.7 ( $\text{C}_1$  and  $\text{C}_2$ ), 29.9 ( $\text{C}_4$ ), 26.0 ( $\text{C}_5$ ), 24.4 ( $\text{C}_3$ ), 12.0 (m,  $\text{C}_7$ ), 7.7 (m,  $^1J_{\text{CPt}} = 513\text{ Hz}$ ,  $^2J_{\text{CPtrans}} = 125\text{ Hz}$ ,  $^2J_{\text{CPcis}} = 8\text{ Hz}$ ,  $\text{C}_8$ ), -17.8 (t,  $^1J_{\text{CPt}} = 615\text{ Hz}$ ,  $\text{C}_6$ ).  $^{31}\text{P}$  NMR (121 MHz,  $\text{C}_6\text{D}_6$ ):  $\delta$  -42.0. Anal.: Calc. for  $\text{C}_{17}\text{H}_{39}\text{N}_3\text{P}_2\text{Pt}$ : C, 37.63; H, 7.25; N, 7.75. Found: C, 37.79; H, 7.23; N, 7.66. ESI-MS:  $m/z$  calculated for  $\text{C}_{17}\text{H}_{39}\text{N}_3\text{P}_2\text{Pt}$   $[\text{M}+\text{H}]^+$  543.2345, found 543.2389.



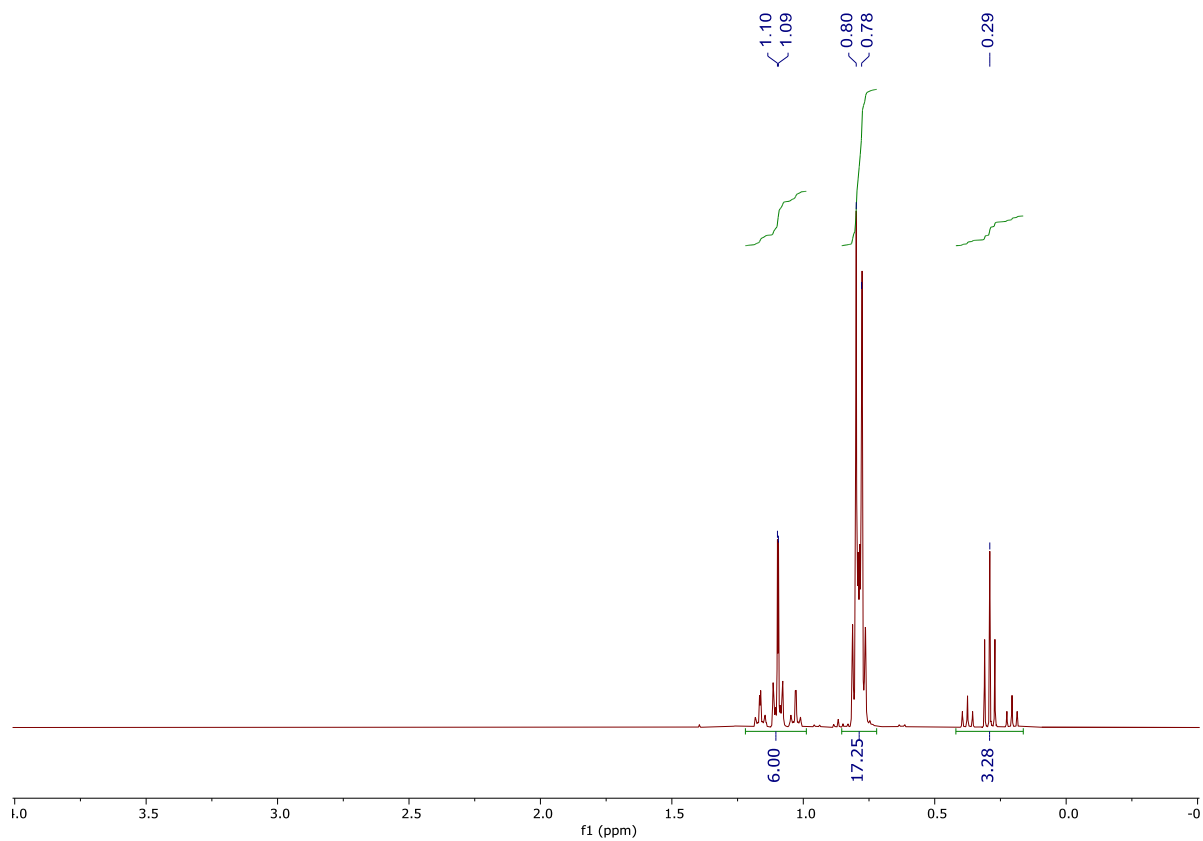

Figure S18.  $^1\text{H}$  NMR spectrum of **Pt(IV)-N<sub>3</sub>** ( $\text{C}_6\text{D}_6$ , 400 MHz, 25 °C).

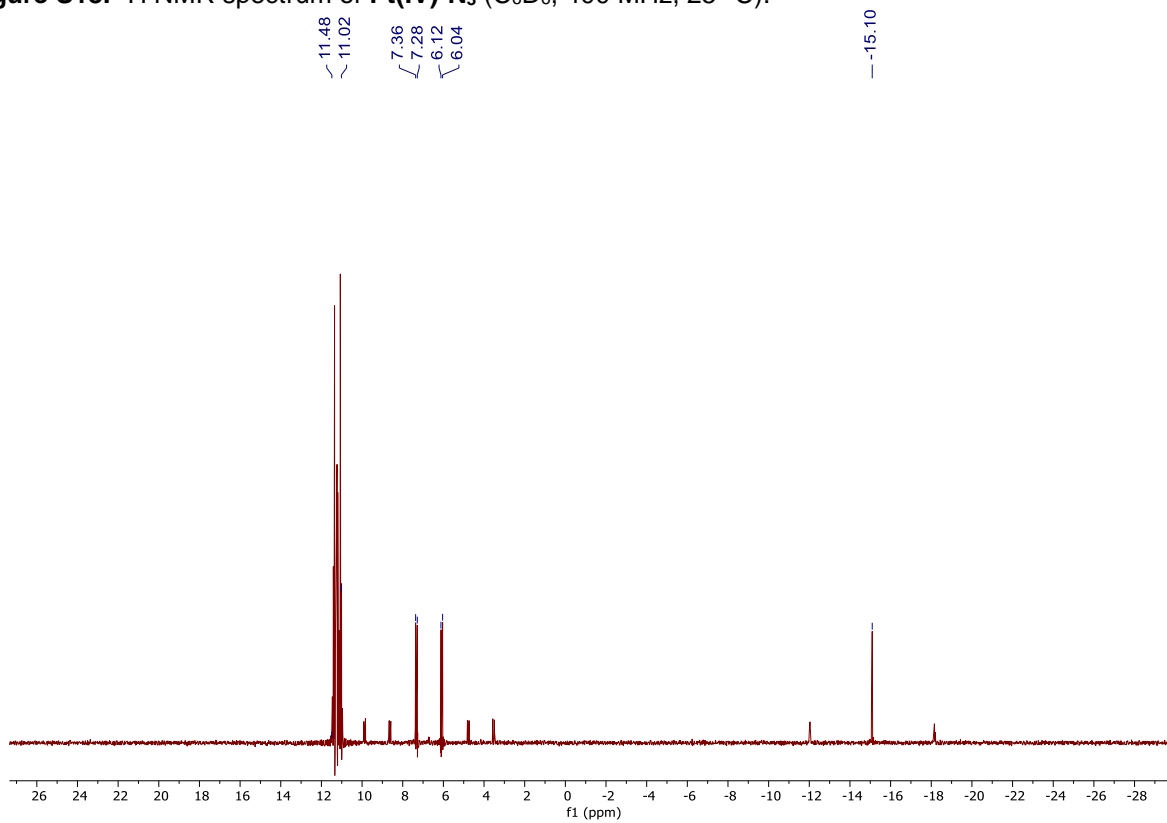

Figure S19.  $^{13}\text{C}$  NMR spectrum of **Pt(IV)-N<sub>3</sub>** ( $\text{C}_6\text{D}_6$ , 400 MHz, 25 °C).

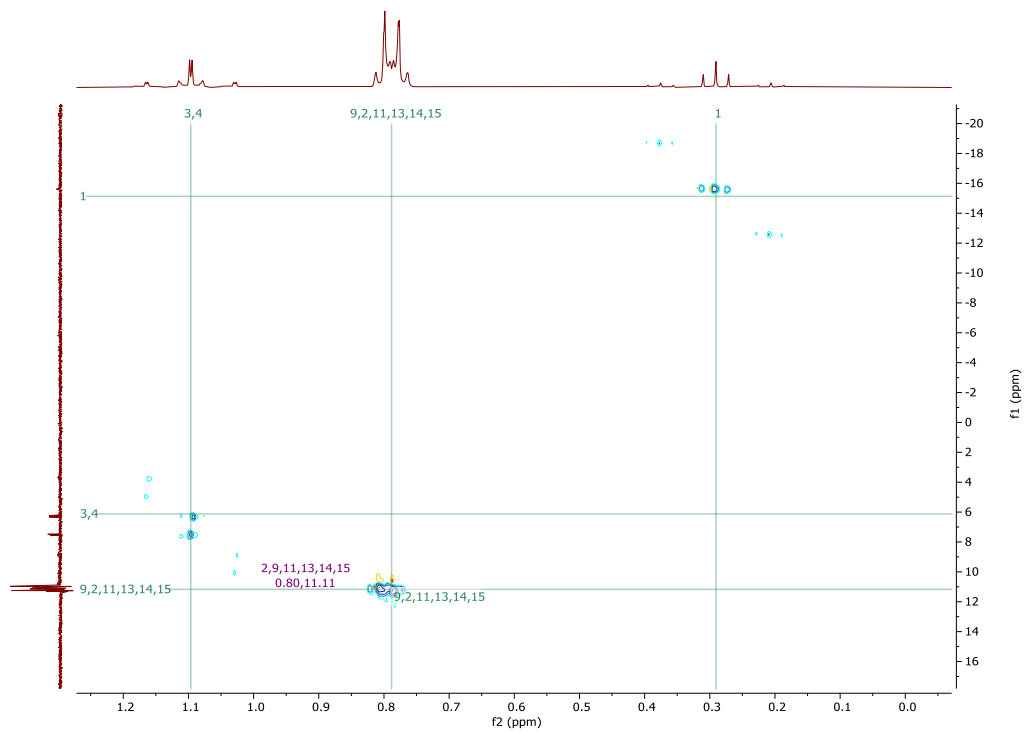

Figure S20.  $^1\text{H}$ - $^{13}\text{C}$  gHSQC spectrum of **Pt(IV)-N<sub>3</sub>** ( $\text{C}_6\text{D}_6$ , 400 MHz, 25 °C).

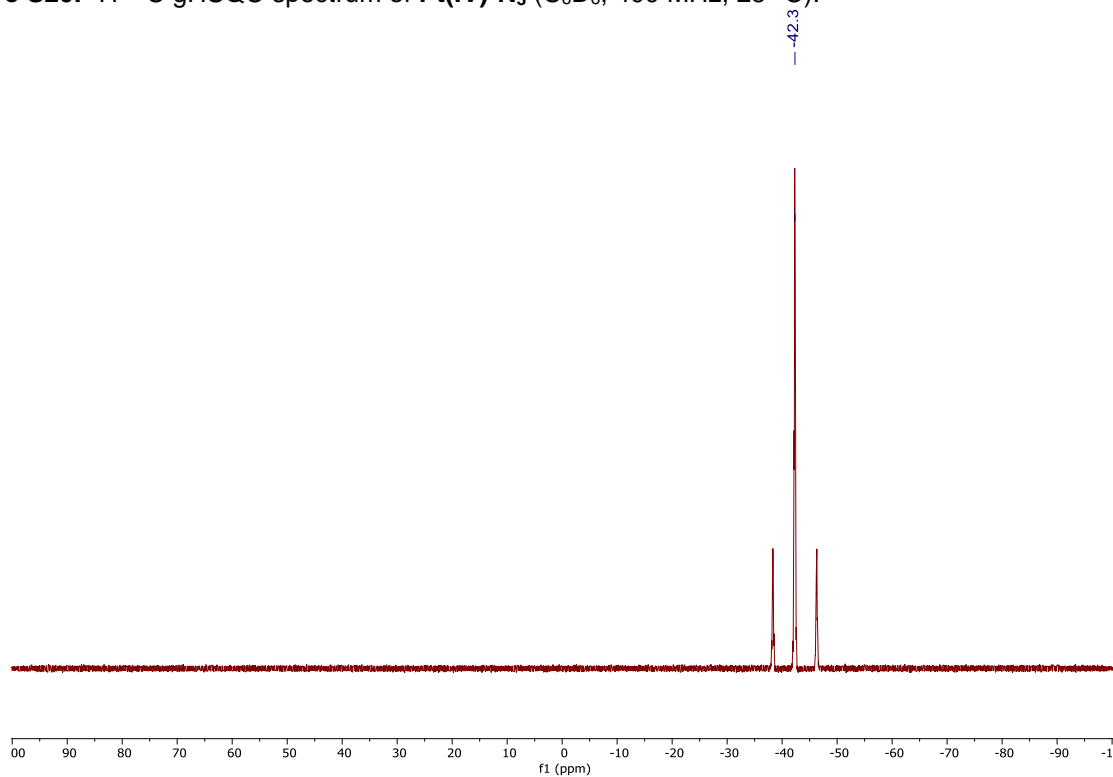

Figure S21.  $^{31}\text{P}\{^1\text{H}\}$  NMR spectrum of **Pt(IV)-N<sub>3</sub>** ( $\text{C}_6\text{D}_6$ , 162 MHz, 25 °C).

## 1.9 X-Ray Crystallography of **Pt(IV)-N<sub>3</sub>**

X-Ray Intensity data were collected at 100 K on a Bruker Dual micro source D8 Venture diffractometer and PHOTON III detector running APEX3 software package of programs and using Mo K $\alpha$  radiation ( $\lambda = 0.71073 \text{ \AA}$ ). The data frames were integrated, and multi-scan scaling was applied in APEX3. Intrinsic phasing structure solution provided all of the non-H atoms.

The structure was refined using full-matrix least-squares refinement.<sup>1</sup> The non-H atoms were refined with anisotropic displacement parameters and all of the H atoms were calculated in idealized positions and refined riding on their parent atoms. In the final cycle of refinement, 4710 reflections (of which 4398 are observed with  $I > 2\sigma(I)$ ) were used to refine 145 parameters and the resulting  $R_1$ ,  $wR_2$  and S (goodness of fit) were 2.19%, 4.78% and 1.200, respectively. The refinement was carried out by minimizing the  $wR_2$  function using  $F^2$  rather than F values.  $R_1$  is calculated to provide a reference to the conventional R value but its function is not minimized.

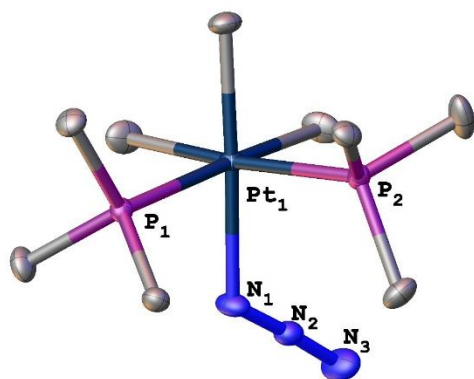

**Figure S22.** Molecular structure of **Pt(IV)-N<sub>3</sub>** (All hydrogen atoms removed for clarity).

**Table S4.** Crystal data and structure refinement for **Pt(IV)-N<sub>3</sub>**.

|                                         |                                                                                                                                                                      |
|-----------------------------------------|----------------------------------------------------------------------------------------------------------------------------------------------------------------------|
| <b>CCDC Number</b>                      | <b>2068056</b>                                                                                                                                                       |
| <b>Empirical formula</b>                | C <sub>9</sub> H <sub>27</sub> N <sub>3</sub> P <sub>2</sub> Pt                                                                                                      |
| <b>Formula weight</b>                   | 434.36                                                                                                                                                               |
| <b>Temperature</b>                      | 100(2) K                                                                                                                                                             |
| <b>Wavelength</b>                       | 0.71073 Å                                                                                                                                                            |
| <b>Crystal system</b>                   | Orthorhombic                                                                                                                                                         |
| <b>Space group</b>                      | <i>Pbca</i>                                                                                                                                                          |
| <b>Unit cell dimensions</b>             | $a = 13.7352(9) \text{ \AA}$ , $\alpha = 90^\circ$ .<br>$b = 11.7608(7) \text{ \AA}$ , $\beta = 90^\circ$ .<br>$c = 19.1917(13) \text{ \AA}$ , $\gamma = 90^\circ$ . |
| <b>Volume</b>                           | 3100.2(3) Å <sup>3</sup>                                                                                                                                             |
| <b>Z</b>                                | 8                                                                                                                                                                    |
| <b>Density (calculated)</b>             | 1.861 Mg/m <sup>3</sup>                                                                                                                                              |
| <b>Absorption coefficient</b>           | 9.238 mm <sup>-1</sup>                                                                                                                                               |
| <b>F(000)</b>                           | 1680                                                                                                                                                                 |
| <b>Crystal size</b>                     | 0.170 x 0.130 x 0.093 mm <sup>3</sup>                                                                                                                                |
| <b>Theta range for data collection</b>  | 2.122 to 30.529°.                                                                                                                                                    |
| <b>Index ranges</b>                     | -19 ≤ h ≤ 19, -16 ≤ k ≤ 16, -27 ≤ l ≤ 27                                                                                                                             |
| <b>Reflections collected</b>            | 51254                                                                                                                                                                |
| <b>Independent reflections</b>          | 4710 [R(int) = 0.0647]                                                                                                                                               |
| <b>Completeness to theta = 25.242°</b>  | 98.8 %                                                                                                                                                               |
| <b>Absorption correction</b>            | multi-scan                                                                                                                                                           |
| <b>Refinement method</b>                | Full-matrix least-squares on F <sup>2</sup>                                                                                                                          |
| <b>Data / restraints / parameters</b>   | 4710 / 0 / 145                                                                                                                                                       |
| <b>Goodness-of-fit on F<sup>2</sup></b> | 1.200                                                                                                                                                                |
| <b>Final R indices [I &gt; 2σ(I)]</b>   | R <sub>1</sub> = 0.0219, wR <sub>2</sub> = 0.0478 [4398]                                                                                                             |
| <b>R indices (all data)</b>             | R <sub>1</sub> = 0.0237, wR <sub>2</sub> = 0.0485                                                                                                                    |
| <b>Extinction coefficient</b>           | n/a                                                                                                                                                                  |
| <b>Largest diff. peak and hole</b>      | 1.175 and -1.577 e.Å <sup>-3</sup>                                                                                                                                   |

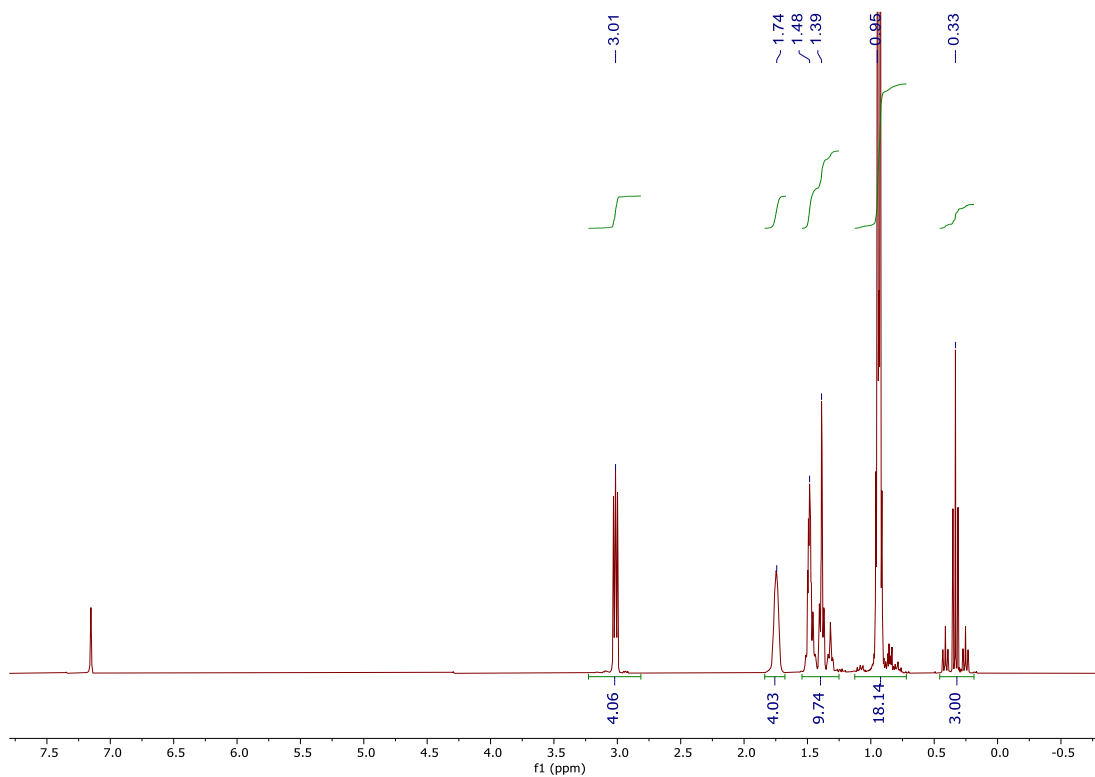

Figure S23.  $^1\text{H}$  NMR spectrum of  $\text{Pt(IV)}\text{N}_2$  ( $\text{C}_6\text{D}_6$ , 400 MHz, 25 °C).

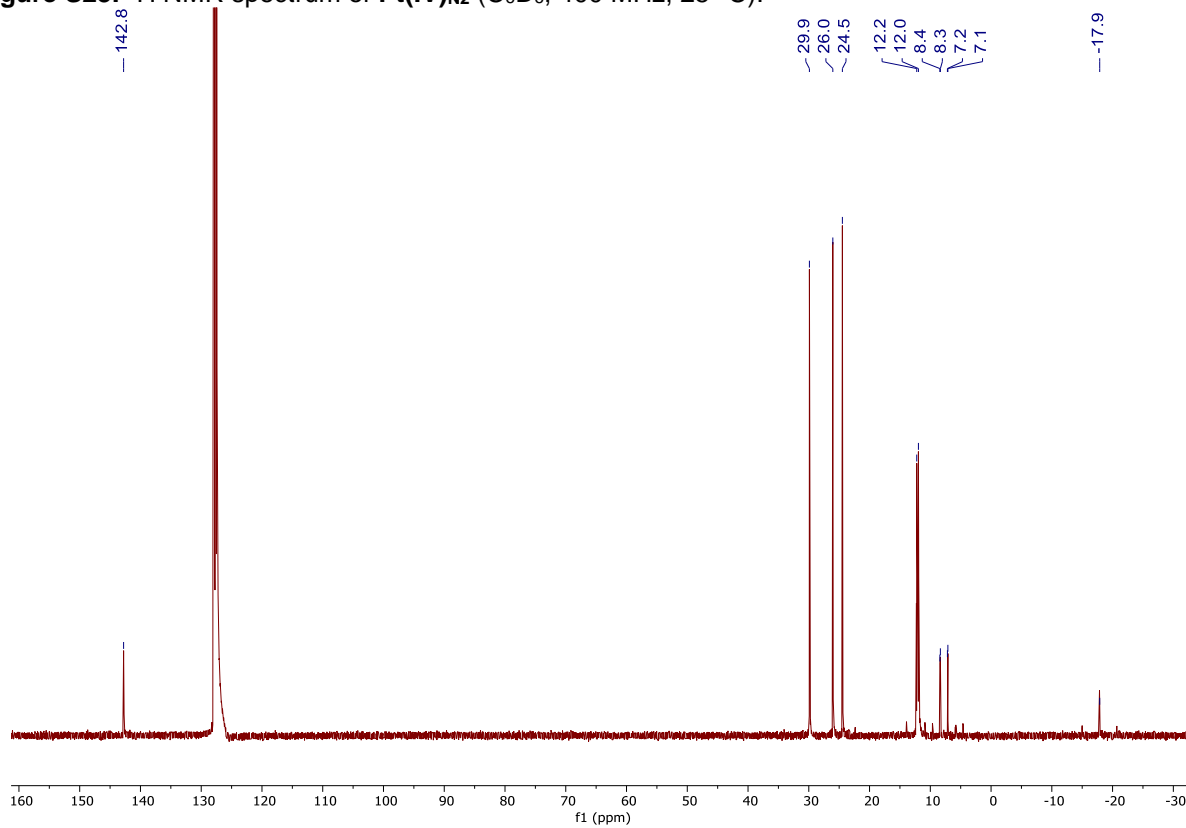

Figure S24.  $^{13}\text{C}$  NMR spectrum of  $\text{Pt(IV)}\text{N}_2$  ( $\text{C}_6\text{D}_6$ , 400 MHz, 25 °C).

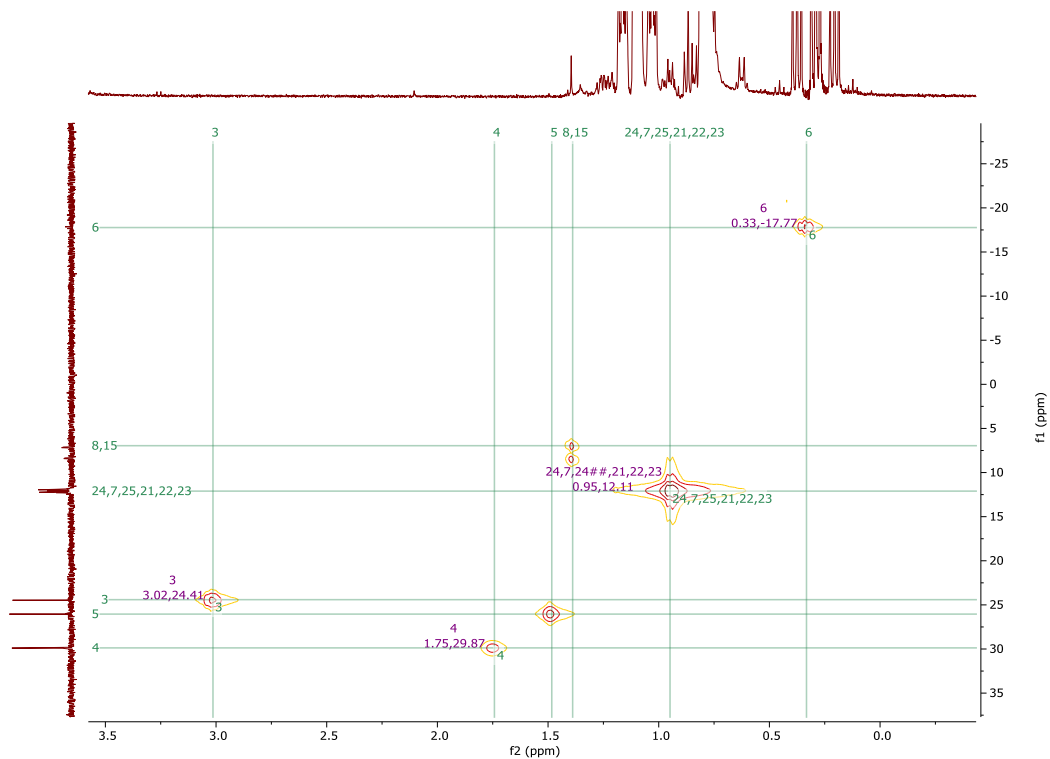

Figure S25.  $^1\text{H}$ - $^{13}\text{C}$  gHSQC spectrum of  $\text{Pt(IV)}\text{N}_2$  ( $\text{C}_6\text{D}_6$ , 400 MHz, 25 °C).

-42.0

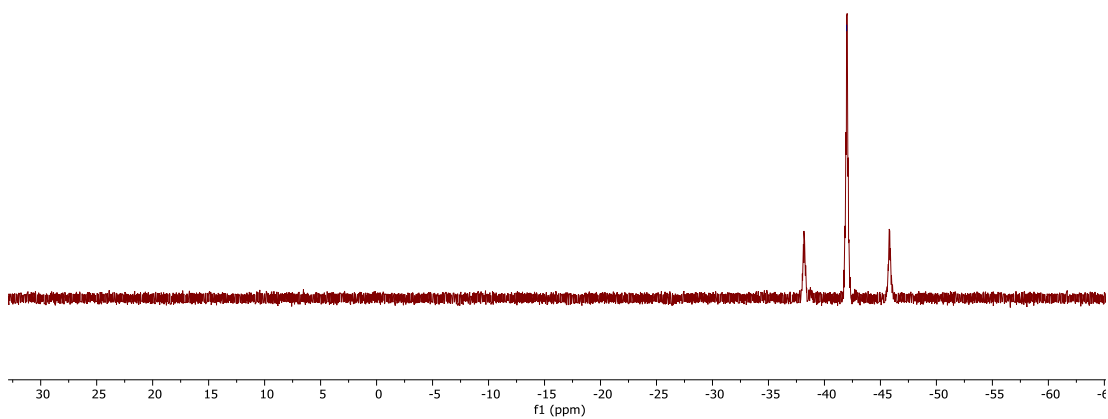

Figure S26.  $^{31}\text{P}\{^1\text{H}\}$  NMR spectrum of  $\text{Pt(IV)}\text{N}_2$  ( $\text{C}_6\text{D}_6$ , 162 MHz, 25 °C).

## 1.10 X-Ray Crystallography of **Pt(IV)<sub>N2</sub>**

X-Ray Intensity data were collected at 100 K on a Bruker Dual micro source D8 Venture diffractometer and PHOTON III detector running APEX3 software package of programs and using Mo K $\alpha$  radiation ( $\lambda = 0.71073 \text{ \AA}$ ). The data frames were integrated and multi-scan scaling was applied in APEX3. Intrinsic phasing structure solution provided all of the non-H atoms.

The structure was refined using full-matrix least-squares refinement.<sup>1</sup> The non-H atoms were refined with anisotropic displacement parameters and all of the H atoms were calculated in idealized positions and refined riding on their parent atoms. In the final cycle of refinement, 7562 reflections (of which 6772 are observed with  $I > 2\sigma(I)$ ) were used to refine 211 parameters and the resulting  $R_1$ ,  $wR_2$  and S (goodness of fit) were 2.94%, 6.57% and 1.170, respectively. The refinement was carried out by minimizing the  $wR_2$  function using  $F^2$  rather than F values.  $R_1$  is calculated to provide a reference to the conventional R value but its function is not minimized.

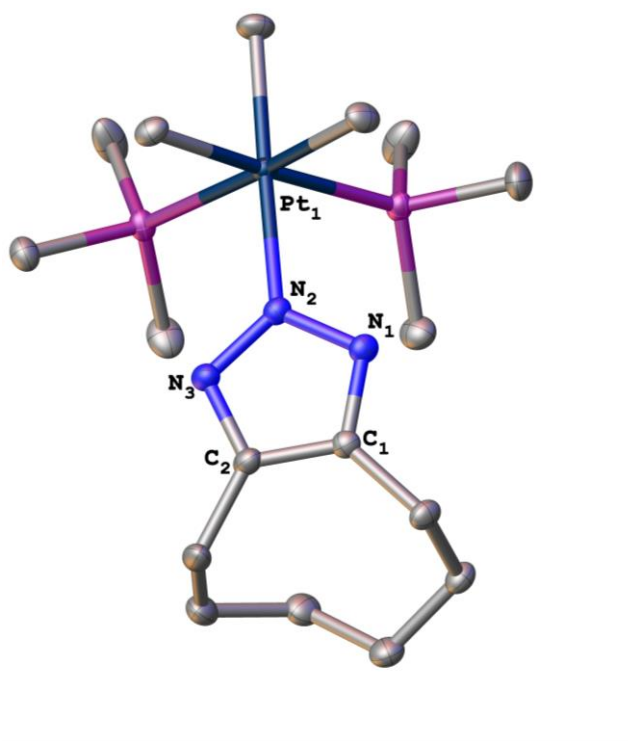

**Figure S27.** Molecular structure of **Pt(IV)<sub>N2</sub>** (All hydrogen atoms removed for clarity).

**Table S5.** Crystal data and structure refinement for **Pt(IV)<sub>N2</sub>**.

|                                         |                                                                                                                                                                     |
|-----------------------------------------|---------------------------------------------------------------------------------------------------------------------------------------------------------------------|
| <b>CCDC Number</b>                      | <b>2069850</b>                                                                                                                                                      |
| <b>Empirical formula</b>                | C17 H39 N3 P2 Pt                                                                                                                                                    |
| <b>Formula weight</b>                   | 542.54                                                                                                                                                              |
| <b>Temperature</b>                      | 100(2) K                                                                                                                                                            |
| <b>Wavelength</b>                       | 0.71073 Å                                                                                                                                                           |
| <b>Crystal system</b>                   | Monoclinic                                                                                                                                                          |
| <b>Space group</b>                      | P 21/c                                                                                                                                                              |
| <b>Unit cell dimensions</b>             | $a = 7.5376(9) \text{ \AA}$ , $\alpha=90^\circ$ .<br>$b = 13.5921(17) \text{ \AA}$ , $\beta=98.856(4)^\circ$ .<br>$c = 21.634(3) \text{ \AA}$ , $\gamma=90^\circ$ . |
| <b>Volume</b>                           | 2190.0(5) Å <sup>3</sup>                                                                                                                                            |
| <b>Z</b>                                | 4                                                                                                                                                                   |
| <b>Density (calculated)</b>             | 1.646 Mg/m <sup>3</sup>                                                                                                                                             |
| <b>Absorption coefficient</b>           | 6.557 mm <sup>-1</sup>                                                                                                                                              |
| <b>F(000)</b>                           | 1080                                                                                                                                                                |
| <b>Crystal size</b>                     | 0.123 x 0.123 x 0.035 mm <sup>3</sup>                                                                                                                               |
| <b>Theta range for data collection</b>  | 1.905 to 32.844°.                                                                                                                                                   |
| <b>Index ranges</b>                     | -11≤h≤11, -20≤k≤20, -32≤l≤32                                                                                                                                        |
| <b>Reflections collected</b>            | 58423                                                                                                                                                               |
| <b>Independent reflections</b>          | 7562 [R(int) = 0.0584]                                                                                                                                              |
| <b>Completeness to theta = 25.242°</b>  | 99.5 %                                                                                                                                                              |
| <b>Absorption correction</b>            | multi-scan                                                                                                                                                          |
| <b>Refinement method</b>                | Full-matrix least-squares on F <sup>2</sup>                                                                                                                         |
| <b>Data / restraints / parameters</b>   | 7562 / 0 / 211                                                                                                                                                      |
| <b>Goodness-of-fit on F<sup>2</sup></b> | 1.170                                                                                                                                                               |
| <b>Final R indices [I&gt;2sigma(I)]</b> | R <sub>1</sub> = 0.0294, wR <sub>2</sub> = 0.0657 [6772]                                                                                                            |
| <b>R indices (all data)</b>             | R <sub>1</sub> = 0.0342, wR <sub>2</sub> = 0.0679                                                                                                                   |
| <b>Extinction coefficient</b>           | n/a                                                                                                                                                                 |
| <b>Largest diff. peak and hole</b>      | 2.869 and -3.098 e.Å <sup>-3</sup>                                                                                                                                  |



## 2. Supplementary Computational Data

### 2.1 Computational Details

Geometries were fully optimized using the Gaussian 09 software package.<sup>9</sup> All relevant minima and transition states were fully optimized in the gas phase at the B3LYP<sup>10,11</sup> level of theory employing correlation-consistent polarized valence double- $\zeta$  Dunning (DZ) basis sets with cc-pVDZ quality<sup>12,13</sup> from the EMSL basis set exchange library, using a small core pseudopotential on all metals.<sup>14</sup> All calculations were performed using standard Gaussian 09 SCF convergence criteria with the density fitting approximation (Resolution of Identity, RI)<sup>15–18</sup>. The nature of each stationary point was checked with an analytical second-derivative calculation (no imaginary frequency for minima, exactly one imaginary frequency for transition states, corresponding to the reaction coordinate). Transition states were located using a relaxed potential energy scan to arrive at a suitable transition-state guess, followed by optimization using the Gaussian09 Berny algorithm (opt=ts). The accuracy of the TS was confirmed with an intrinsic reaction coordinate (IRC) scan.<sup>19</sup> Final single-point energies were calculated by employing triple- $\zeta$  Dunning (TZ) basis sets (cc-pVTZ quality)<sup>12</sup> while retaining the B3LYP functional. Solvent effects (benzene,  $\epsilon = 2.27$ ; tetrahydrofuran,  $\epsilon = 7.58$ ; DMSO,  $\epsilon = 46.7$ ; chloroform,  $\epsilon = 4.81$ ) with the polarizable continuum model approach (PCM) were included in the single point calculations.<sup>20</sup> Grimme dispersion corrections with zero or Becke-Johnson damping (keyword -zero or -bj) were added at this stage using the standalone dftd3 program.<sup>21,22</sup> Enthalpies and Gibbs free energies were then obtained from TZ single-point energies and thermal corrections from the B3LYP/cc-pVDZ-(PP) vibrational analyses (at 298 K and 1 atm); entropy corrections were scaled by a factor of 0.67 to account for decreased entropy in the condensed phase.<sup>23–25</sup> The accuracy of the computational approach was tested by comparing the B3LYP(PCM) results to those obtained using B3LYP with the Solvation Model based on Density (SMD).<sup>26</sup> Further benchmark comparisons used the SMD solvent model for comparison with functionals CAM-B3LYP,<sup>27</sup> MN15 (Gaussian16),<sup>28,29</sup> and  $\omega$ B97xD.<sup>30</sup> Ultimately, interaction energies and free energy barriers for SPAAC

iClick reactivity exhibited minimal variation and illustrated the same trends. To test the validity of the gas-phase optimization/solvent correction at Single Point Energy stage, the **Au-N<sub>3</sub>** system was also fully optimized in solution (THF and CHCl<sub>3</sub>) indicating also only minimal changes.

Maps of steric bulk were generated using the SambVca 2.0 program providing a calculated.  $\Delta\% V_{\text{Bur}}$ .<sup>31</sup> In all cases, the scanning sphere was centered on N1, metal and N1 were chosen as z-axis definition, and N2 was chosen as the xz plane definition. Azide nitrogen were deleted, radii scaled to 1.17, sphere radius was set to 5, and mesh spacing set to .1. The distance from center of sphere to coordination sphere was set to 0 and hydrogen atoms were included in the calculation.

## 2.2 Comparison between X-Ray and Calculated Structures

**Table S6.** Comparison between the M-N<sub>3</sub> precursor X-Ray structure (Exp) and calculated structures (DFT) optimized at B3LYP/cc-pVDZ level of theory.

| Compound                        | W-N <sub>3</sub><br>(Exp)      | W-N <sub>3</sub><br>(DFT)      | %Error | Au-N <sub>3</sub><br>(Exp)     | Au-N <sub>3</sub><br>(DFT)     | %Error | RuN <sub>3</sub><br>(Exp)                 | RuN <sub>3</sub><br>(DFT)                 | %Error |
|---------------------------------|--------------------------------|--------------------------------|--------|--------------------------------|--------------------------------|--------|-------------------------------------------|-------------------------------------------|--------|
| M-N1 (Å)                        | 2.18                           | 2.12                           | 3      | 2.10                           | 2.03                           | 3      | 2.21                                      | 2.13                                      | 4      |
| Averaged N1-N2<br>and N2-N3 (Å) | 1.18                           | 1.19                           | 0      | 1.15                           | 1.18                           | -3     | 1.15                                      | 1.19                                      | -3     |
| ∠M-N1-N2 (°)                    | 125.0                          | 128.5                          | -3     | 120.4                          | 123.4                          | -2     | 123.6                                     | 121.9                                     | 1      |
| Compound                        | Pt(II)-N <sub>3</sub><br>(Exp) | Pt(II)-N <sub>3</sub><br>(DFT) | %Error | Pt(IV)-N <sub>3</sub><br>(Exp) | Pt(IV)-N <sub>3</sub><br>(DFT) | %Error | (PtN <sub>3</sub> ) <sub>4</sub><br>(Exp) | (PtN <sub>3</sub> ) <sub>4</sub><br>(DFT) | %Error |
| M-N1 (Å)                        | 2.08                           | 2.16                           | -4     | 2.17                           | 2.20                           | -1     | 2.35                                      | 2.32                                      | 0      |
| Averaged N1-N2<br>and N2-N3 (Å) | 1.19                           | 1.19                           | 1      | 1.18                           | 1.19                           | -1     | 1.29                                      | 1.19                                      | -1     |
| ∠M-N1-N2 (°)                    | 127.5                          | 122.9                          | 4      | 120.7                          | 122.9                          | -2     | 122.2                                     | 127.3                                     | 0      |

**Table S7.** Comparison between M-triazolate X-Ray structure (Exp) and calculated structures (DFT) optimized at B3LYP/cc-pVDZ level of theory.

| Compound                        | Au <sub>N1</sub><br>(Exp) | Au <sub>N1</sub><br>(DFT) | %Error | W <sub>N2</sub><br>(Exp) | W <sub>N2</sub><br>(DFT) | Error | Re <sub>N2</sub><br>(Exp) | Re <sub>N2</sub><br>(DFT) | Error |
|---------------------------------|---------------------------|---------------------------|--------|--------------------------|--------------------------|-------|---------------------------|---------------------------|-------|
| M-N1/N2* (Å)                    | 2.06                      | 2.04                      | 1      | 2.16                     | 2.16                     | 0     | 2.15                      | 2.17                      | -1    |
| Averaged N1-N2<br>and N2-N3 (Å) | 1.28                      | 1.34                      | -4     | 1.35                     | 1.34                     | 1     | 1.34                      | 1.34                      | 0     |
| C-C (triazolate) (Å)            | 1.37                      | 1.39                      | -1     | 1.41                     | 1.42                     | -1    | 1.39                      | 1.41                      | -1    |
| ∠M-N1-N2 (°)                    | 119.7                     | 117.1                     | 2      | 122.2                    | 124.5                    | -2    | 122.9                     | 123.9                     | -1    |
| ∠N1-N2-N3 (°)                   | 113.6                     | 108.7                     | 4      | 111.9                    | 112.3                    | 0     | 112.5                     | 112.7                     | 0     |

\*M-N1/N2 represents metal bonding to either N1 or N2 of the triazolate.

## 2.3 FMO Interaction energies

**Table S8.** B3LYP FMO interaction energies ( $\Delta\epsilon$  in eV) between M-N<sub>3</sub> and Cyclooctyne-obtained from distorted TS geometries of each reactant fragment.

|                                                     | HOMO (eV)                                                     |                | LUMO (eV)                                                     |                |
|-----------------------------------------------------|---------------------------------------------------------------|----------------|---------------------------------------------------------------|----------------|
| <b>Cyclooctyne</b>                                  | -6.868                                                        |                | -0.578                                                        |                |
|                                                     | $\Delta\epsilon$ (HOMO <sub>CO</sub> -LUMO <sub>az</sub> )-eV | <b>Orbital</b> | $\Delta\epsilon$ (HOMO <sub>az</sub> -HOMO <sub>CO</sub> )-eV | <b>Orbital</b> |
| <b>Au-N<sub>3</sub></b>                             | <b>-5.238</b>                                                 | LUMO           | <b>-5.822</b>                                                 | HOMO(-1)       |
| <b>AuP(CH<sub>3</sub>)<sub>3</sub>N<sub>3</sub></b> | <b>-5.291</b>                                                 | LUMO           | <b>-5.798</b>                                                 | HOMO(-1)       |
| <b>W-N<sub>3</sub></b>                              | <b>-5.443</b>                                                 | LUMO(+1)       | <b>-4.528</b>                                                 | HOMO           |
| <b>Re-N<sub>3</sub></b>                             | <b>-5.019</b>                                                 | LUMO(+3)       | <b>-4.521</b>                                                 | HOMO(-1)       |
| <b>Pt(IV)-N<sub>3</sub></b>                         | <b>-5.727</b>                                                 | LUMO           | <b>-5.283</b>                                                 | HOMO(-1)       |
| <b>Ru-N<sub>3</sub></b>                             | <b>-5.626</b>                                                 | LUMO           | <b>-4.528</b>                                                 | HOMO(-1)       |
| <b>RuP(CH<sub>3</sub>)<sub>3</sub>N<sub>3</sub></b> | <b>-6.12</b>                                                  | LUMO           | <b>-4.444</b>                                                 | HOMO(-1)       |
| <b>Pt(II)-N<sub>3</sub></b>                         | <b>-5.853</b>                                                 | LUMO           | <b>-4.976</b>                                                 | HOMO(-1)       |
| <b>PtP(CH<sub>3</sub>)<sub>3</sub>N<sub>3</sub></b> | <b>-5.98</b>                                                  | LUMO           | <b>-5.054</b>                                                 | HOMO(-1)       |
| <b>(PtN<sub>3</sub>)<sub>4</sub></b>                | <b>-3.996</b>                                                 | LUMO           | <b>-6.1905</b>                                                | HOMO           |

\*Both normal (HOMO<sub>az</sub>-LUMO<sub>CO</sub>) and inverse electron demand (HOMO<sub>CO</sub>-LUMO<sub>az</sub>) are listed and neither have a significant trend to explain the reactivity difference in the azides.

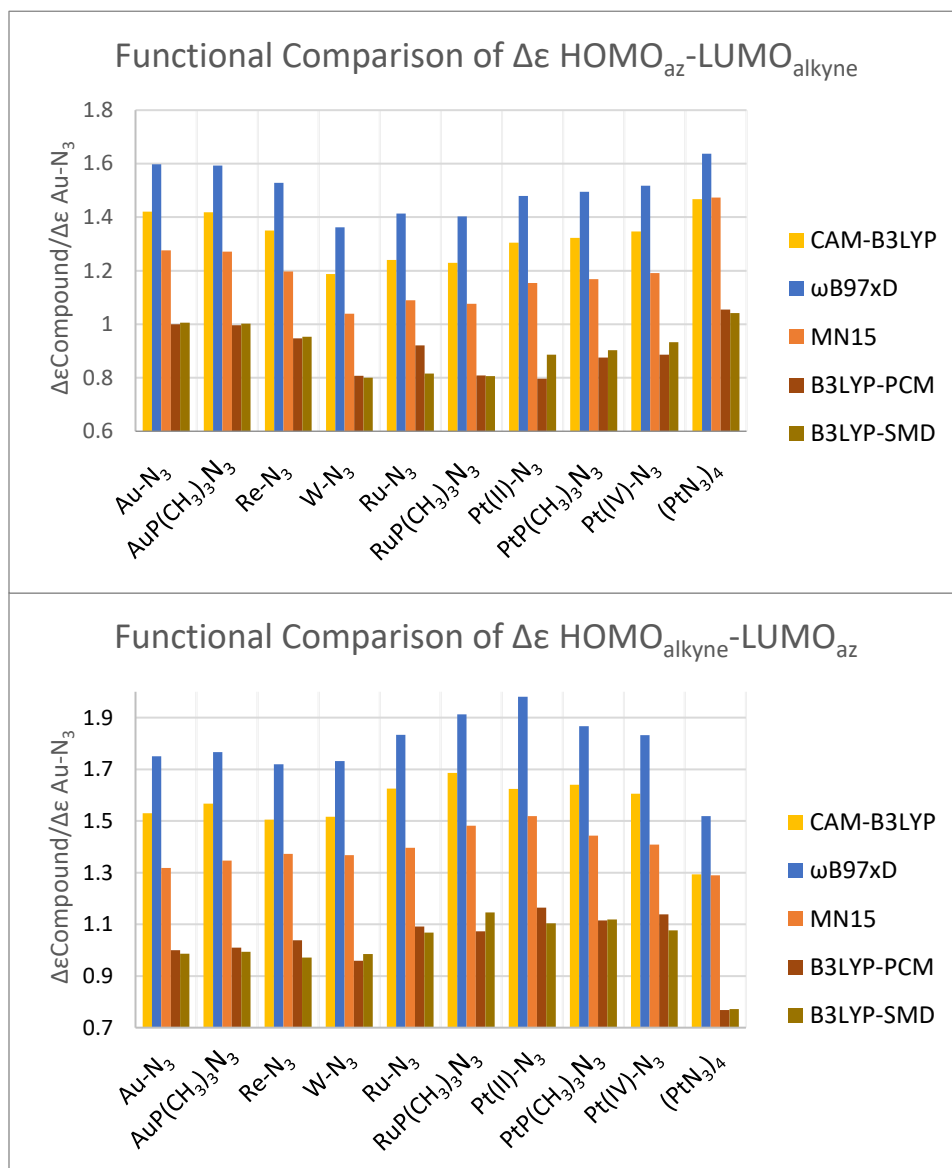

**Figure S28.** Functional Comparison of FMO Interaction energies. Ratios set to reference of **Au-N<sub>3</sub>**'s B3LYP interaction energies show that although the magnitude of the energies change, the general trend remains very close between all four functionals.

## 2.4 SambVCA % Buried Volume (% $V_{bur}$ ) of $M-N_3$

**Table S9.** SambVCA Steric Analysis- % Buried Volume (%  $V_{bur}$ ) of  $M-N_3$  where cyclooctyne approaches.

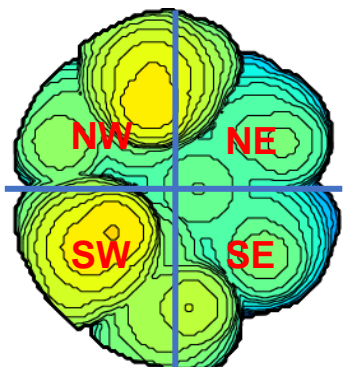

| % $V_{bur}$                                       | Total | SW   | NW   | NE   | SE   |
|---------------------------------------------------|-------|------|------|------|------|
| <b>Ru-<math>N_3</math></b>                        | 63.1  | 74.7 | 73.0 | 57.9 | 46.8 |
| <b>Pt(II)-<math>N_3</math></b>                    | 52.6  | 67.6 | 42.1 | 59.3 | 41.4 |
| <b>(Pt<math>N_3</math>)<sub>4</sub></b>           | 68.3  | 93.5 | 93.5 | 42.2 | 43.8 |
| Au- $N_3$                                         | 14.6  | 15.7 | 16.7 | 13.2 | 12.7 |
| AuP(CH <sub>3</sub> ) <sub>3</sub> N <sub>3</sub> | 11.1  | 11.8 | 11.9 | 10.3 | 10.3 |
| W- $N_3$                                          | 42.7  | 53.5 | 53.2 | 31.9 | 32.2 |
| Re- $N_3$                                         | 38.2  | 29.8 | 30.0 | 46.7 | 46.4 |
| RuP(CH <sub>3</sub> ) <sub>3</sub> N <sub>3</sub> | 50.7  | 56.7 | 50.9 | 42.4 | 52.9 |
| Pt(IV)- $N_3$                                     | 43.9  | 57.0 | 54.4 | 31.4 | 32.9 |
| PtP(CH <sub>3</sub> ) <sub>3</sub> N <sub>3</sub> | 35.2  | 55.6 | 16.2 | 49.7 | 19.3 |
| Pt(CH <sub>3</sub> ) <sub>3</sub> N <sub>3</sub>  | 18.3  | 22.9 | 22.4 | 13.6 | 14.5 |

\*The red highlighted rows represent azides with high calculated SPAAC iClick barriers and the green rows represent azides with low calculated barriers.

## 2.5 SambVCA Steric Map of (Pt $N_3$ )<sub>4</sub> and Pt(CH<sub>3</sub>)<sub>3</sub>N<sub>3</sub>

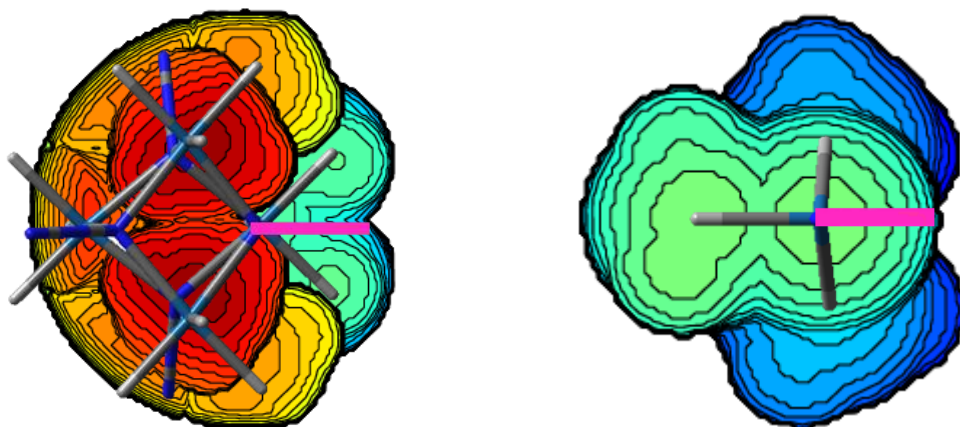

**Figure S29.** The steric map of the tetrameric ((Pt $N_3$ )<sub>4</sub>, left) and monomeric (Pt(CH<sub>3</sub>)<sub>3</sub>N<sub>3</sub>, right) (azide centered to right and colored pink for emphasis; blue to red represents increasing steric bulk) suggests that the cluster is too sterically hindered to react with cyclooctyne (%  $V_{bur}$ =68.3;  $\Delta G$ =41.0 kcal/mol) and requires theoretical dissociation to react (%  $V_{bur}$ =18.3;  $\Delta G$ =21.4 kcal/mol).

## 2.6 SambVCA Steric Map of **Pt(IV)-N<sub>3</sub>**'s Reacting Azide

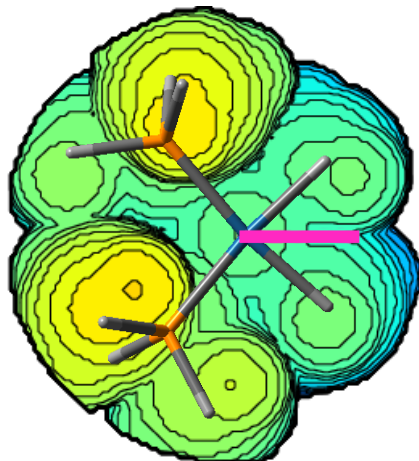

**Figure S30.** The steric map of **Pt(IV)-N<sub>3</sub>** (azide centered to right and colored pink for emphasis; blue to red represents increasing steric bulk) illustrates ample space for the alkyne to approach for cycloaddition. While not as free as the linear **Au-N<sub>3</sub>**, the steric profile of **Pt(IV)-N<sub>3</sub>** resembles that of the other octahedral complexes **Re-N<sub>3</sub>** and **W-N<sub>3</sub>**. The %V<sub>bur</sub> of 43.9 is comparable to **Re-N<sub>3</sub>** and **W-N<sub>3</sub>**, supporting this assessment.

## 2.7 Comparison of Potential Energy Surfaces of **Ru-N<sub>3</sub>** and RuP(CH<sub>3</sub>)<sub>3</sub>N<sub>3</sub>

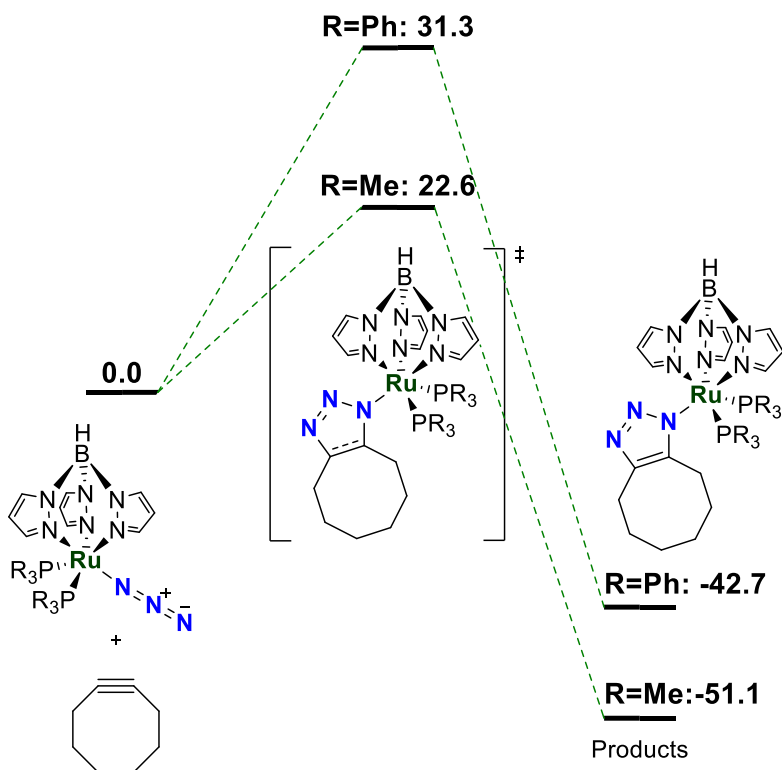

## 2.7 Energy Tables of SPAAC iClick Reactivity

**Table S10.** Final Energies, Enthalpy and Entropy Corrections, Gibbs Free Energies from B3LYP functional with Becke-Johnson Damping Dispersion Correction-D3. In Hartree. See Computational Details for Methods.

| Metal (Solvent)                        | Structure                                                            | E(B3LYP/cc-pVDZ) | E(B3LYP(PCM)/cc-pVTZ) | ZPE      | D3         | H <sub>correction</sub> | S <sub>correction</sub> | G            |
|----------------------------------------|----------------------------------------------------------------------|------------------|-----------------------|----------|------------|-------------------------|-------------------------|--------------|
|                                        | CycloOctyne (Benzene)                                                | -312.0112817     | -312.1140186          | 0.178609 | -0.0327634 | 0.187449                | 0.040713                | -311.9866107 |
|                                        | CycloOctyne (DMSO)                                                   | -312.0112817     | -312.1157522          | 0.178609 | -0.0327634 | 0.187449                | 0.040713                | -311.9883443 |
|                                        | CycloOctyne (THF)                                                    | -312.0112817     | -312.1151749          | 0.178609 | -0.0327634 | 0.187449                | 0.040713                | -311.9877670 |
| <b>Au (THF)</b>                        | <b>Au-N<sub>3</sub></b>                                              | -1336.400865     | -1336.680478          | 0.287366 | -0.1051097 | 0.3099670               | 0.0797820               | -1336.529075 |
|                                        | Au-N <sub>3</sub> cycloOctyneClickTS                                 | -1648.390182     | -1648.764762          | 0.466427 | -0.1476348 | 0.4978340               | 0.1015660               | -1648.482612 |
|                                        | <b>Au<sub>N1</sub></b>                                               | -1648.524278     | -1648.897576          | 0.472385 | -0.1509492 | 0.5021336               | 0.0957479               | -1648.610542 |
|                                        | AuN1toN2isomerizationTS                                              | -1648.500527     | -1648.870785          | 0.471638 | -0.1498146 | 0.5021336               | 0.0949481               | -1648.582081 |
|                                        | <b>Au<sub>N2</sub></b>                                               | -1648.531755     | -1648.900461          | 0.472742 | -0.1484851 | 0.5022628               | 0.0978821               | -1648.612264 |
|                                        |                                                                      |                  |                       |          |            |                         |                         |              |
|                                        | AuP(CH <sub>3</sub> ) <sub>3</sub> N <sub>3</sub>                    | -761.1649753     | -761.3006787          | 0.126565 | -0.0327180 | 0.139606                | 0.054867                | -761.2305516 |
|                                        | AuP(CH <sub>3</sub> ) <sub>3</sub> N <sub>3</sub> cycloOctyneClickTS | -1073.154266     | -1073.384934          | 0.305784 | -0.0749792 | 0.327519                | 0.074896                | -1073.182575 |
|                                        | AuP(CH <sub>3</sub> ) <sub>3</sub> N <sub>3</sub> cycloOctyneProduct | -1073.288016     | -1073.518059          | 0.311716 | -0.0780682 | 0.331866                | 0.070552                | -1073.311531 |
| <b>Re (DMSO)</b>                       | <b>Re-N<sub>3</sub></b>                                              | -1078.457350     | -1078.766416          | 0.199196 | -0.0867308 | 0.220220                | 0.071925                | -1078.681116 |
|                                        | Re-N <sub>3</sub> cycloOctyneClickTS                                 | -1390.446088     | -1390.850878          | 0.378198 | -0.1307250 | 0.408069                | 0.094196                | -1390.636645 |
|                                        | <b>Re<sub>N1</sub></b>                                               | -1390.584551     | -1390.981024          | 0.384948 | -0.1345058 | 0.412937                | 0.086961                | -1390.760857 |
|                                        | ReN1toN2isomerizationTS                                              | -1390.551564     | -1390.947682          | 0.383644 | -0.1360849 | 0.411254                | 0.086821                | -1390.730683 |
|                                        | <b>Re<sub>N2</sub></b>                                               | -1390.590465     | -1390.986143          | 0.384732 | -0.1308227 | 0.412875                | 0.088299                | -1390.763251 |
| <b>Ru (C<sub>6</sub>H<sub>6</sub>)</b> | <b>Ru-N<sub>3</sub></b>                                              | -3034.102610     | -3034.767203          | 0.765927 | -0.3423641 | 0.817797                | 0.138321                | -3034.384445 |
|                                        | Ru-N <sub>3</sub> cycloOctyneClickTS                                 | -3346.080393     | -3346.829010          | 0.945198 | -0.3950841 | 1.005568                | 0.157136                | -3346.323807 |
|                                        | Ru-N <sub>3</sub> cycloOctyneProduct                                 | -3346.193681     | -3346.947212          | 0.951687 | -0.4043638 | 1.010572                | 0.152519                | -3346.443191 |
|                                        |                                                                      |                  |                       |          |            |                         |                         |              |
|                                        | RuP(CH <sub>3</sub> ) <sub>3</sub> N <sub>3</sub>                    | -1883.655948     | -1884.035381          | 0.443302 | -0.1647307 | 0.476204                | 0.093735                | -1883.786710 |
|                                        | RuP(CH <sub>3</sub> ) <sub>3</sub> N <sub>3</sub> cycloOctyneClickTS | -2195.639437     | -2196.112977          | 0.622629 | -0.2150462 | 0.664117                | 0.112933                | -2195.739571 |
|                                        | RuP(CH <sub>3</sub> ) <sub>3</sub> N <sub>3</sub> cycloOctyneProduct | -2195.764332     | -2196.233333          | 0.629223 | -0.2216957 | 0.669111                | 0.108089                | -2195.858338 |



**Table S10 Cont'd.** Final Energies, Enthalpy and Entropy Corrections, Gibbs Free Energies from B3LYP functional with Becke-Johnson Damping Dispersion Correction-D3. In Hartree. See Computational Details for Methods.

| <b>Metal (Solvent)</b>                                            | <b>Structure</b>                                                         | <b>E(B3LYP/cc-pVDZ)</b> | <b>E(B3LYP(PCM)/cc-pVTZ)</b> | <b>ZPE</b> | <b>D3</b>   | <b>H<sub>correction</sub></b> | <b>S<sub>correction</sub></b> | <b>G</b>     |
|-------------------------------------------------------------------|--------------------------------------------------------------------------|-------------------------|------------------------------|------------|-------------|-------------------------------|-------------------------------|--------------|
| <b>Pt(II) (C<sub>6</sub>H<sub>6</sub>)</b>                        | <b>Pt(II)-N<sub>3</sub></b>                                              | -1717.690972            | -1718.054753                 | 0.618443   | -0.0811448  | 0.657461                      | 0.107616                      | -1717.550540 |
|                                                                   | Pt(II)-N <sub>3</sub> cycloOctyneClickTS                                 | -2029.665348            | -2030.122633                 | 0.798756   | -0.1292793  | 0.845824                      | 0.124214                      | -2029.489312 |
|                                                                   | Pt(II)-N <sub>3</sub> cycloOctyneProduct                                 | -2029.802561            | -2030.254797                 | 0.805156   | -0.1330729  | 0.850693                      | 0.119924                      | -2029.617526 |
|                                                                   |                                                                          |                         |                              |            |             |                               |                               |              |
|                                                                   | Pt(II)P(CH <sub>3</sub> ) <sub>3</sub> N <sub>3</sub>                    | -1245.962269            | -1246.175479                 | 0.277118   | -0.1839324  | 0.300167                      | 0.074648                      | -1246.109259 |
|                                                                   | Pt(II)P(CH <sub>3</sub> ) <sub>3</sub> N <sub>3</sub> cycloOctyneClickTS | -1557.949114            | -1558.256107                 | 0.456503   | -0.2355753  | 0.488118                      | 0.094588                      | -1558.066938 |
|                                                                   | Pt(II)P(CH <sub>3</sub> ) <sub>3</sub> N <sub>3</sub> cycloOctyneProduct | -1558.084680            | -1558.387232                 | 0.462364   | -0.2404881  | 0.492493                      | 0.090608                      | -1558.195935 |
| <b>W (DMSO)</b>                                                   | <b>W-N<sub>3</sub></b>                                                   | -1071.236245            | -1071.549879                 | 0.260776   | -0.1024593  | 0.283259                      | 0.073804                      | -1071.418528 |
|                                                                   | W-N <sub>3</sub> cycloOctyneClickTS                                      | -1382.641196            | -1383.631922                 | 0.440151   | -0.1507867  | 0.471281                      | 0.093700                      | -1383.374207 |
|                                                                   | <b>W<sub>N1</sub></b>                                                    | -1383.357342            | -1383.757985                 | 0.446884   | -0.1560650  | 0.476217                      | 0.088260                      | -1383.496967 |
|                                                                   | WN1toN2isomerizationTS                                                   | -1382.753024            | -1383.735666                 | 0.445900   | -0.1526201  | 0.474839                      | 0.088250                      | -1383.472574 |
|                                                                   | <b>W<sub>N2</sub></b>                                                    | -1382.781085            | -1383.767010                 | 0.446700   | -0.1511211  | 0.476169                      | 0.089452                      | -1383.501895 |
| <b>Pt(IV) (C<sub>6</sub>H<sub>6</sub>)</b>                        | <b>Pt(IV)-N<sub>3</sub></b>                                              | -1325.737086            | -1325.981298                 | 0.352443   | -0.1086413  | 0.379196                      | 0.080820                      | -1325.764893 |
|                                                                   | Pt(IV)-N <sub>3</sub> cycloOctyneClickTS                                 | -1637.722330            | -1638.060033                 | 0.531872   | -0.1569944  | 0.567109                      | 0.100079                      | -1637.716971 |
|                                                                   | <b>Pt(IV)<sub>N1</sub></b>                                               | -1637.861677            | -1638.192187                 | 0.538496   | -0.1619954  | 0.572073                      | 0.095106                      | -1637.845831 |
|                                                                   | Pt(IV)N1toN2isomerizationTS                                              | -1637.831218            | -1638.159893                 | 0.536274   | -0.1592626  | 0.569904                      | 0.096576                      | -1637.813958 |
|                                                                   | <b>Pt(IV)<sub>N2</sub></b>                                               | -1637.870653            | -1638.198904                 | 0.537858   | -0.1574014  | 0.571815                      | 0.097123                      | -1637.849563 |
| <b>(PtN<sub>3</sub>)<sub>4</sub> (C<sub>6</sub>H<sub>6</sub>)</b> | <b>(PtN<sub>3</sub>)<sub>4</sub></b>                                     | -1613.945159            | -1614.330660                 | 0.497548   | -0.16679008 | 0.544877                      | 0.126006                      | -1614.037000 |
|                                                                   | (PtN <sub>3</sub> ) <sub>4</sub> cycloOctyneClickTS                      | -1925.900653            | -1926.381940                 | 0.678575   | -0.19682025 | 0.733991                      | 0.143592                      | -1925.94098  |
|                                                                   | (PtN <sub>3</sub> ) <sub>4</sub> cycloOctyneProduct                      | -1926.049509            | -1926.524200                 | 0.686608   | -0.20574788 | 0.739804                      | 0.137470                      | -1926.08225  |
|                                                                   |                                                                          |                         |                              |            |             |                               |                               |              |
|                                                                   | Pt(CH <sub>3</sub> ) <sub>3</sub> N <sub>3</sub>                         | -403.4286385            | -403.5392210                 | 0.121835   | -0.02778111 | 0.134056                      | 0.082470                      | 0.051586     |
|                                                                   | Pt(CH <sub>3</sub> ) <sub>3</sub> N <sub>3</sub> cycloOctyneClickTS      | -715.4190124            | -715.6239696                 | 0.301254   | -0.07171153 | 0.322014                      | 0.250004                      | 0.072010     |
|                                                                   | Pt(CH <sub>3</sub> ) <sub>3</sub> N <sub>3</sub> cycloOctyneProduct      | -715.5486168            | -715.7518136                 | 0.307045   | -0.07455223 | 0.326108                      | 0.259540                      | 0.066568     |

**Table S11.** Final Energies, Enthalpy and Entropy Corrections, Gibbs Free Energies from B3LYP functional with Zero Damping Dispersion Correction-D0. In Hartree. See Computational Details for Methods.

| <b>Metal<br/>(Solvent)</b>                 | <b>Structure</b>                                                     | <b>E(B3LYP/cc-pVDZ)</b> | <b>E(B3LYP(PCM)/cc-pVTZ)</b> | <b>ZPE</b> | <b>D0</b>  | <b>H<sub>correction</sub></b> | <b>S<sub>correction</sub></b> | <b>G</b>     |
|--------------------------------------------|----------------------------------------------------------------------|-------------------------|------------------------------|------------|------------|-------------------------------|-------------------------------|--------------|
|                                            | CycloOctyne (Benzene)                                                | -312.0112817            | -312.1140186                 | 0.178609   | -0.0155483 | 0.187449                      | 0.040713                      | -311.9693956 |
|                                            | CycloOctyne (DMSO)                                                   | -312.0112817            | -312.1157522                 | 0.178609   | -0.0155483 | 0.187449                      | 0.040713                      | -311.9711292 |
|                                            | CycloOctyne (THF)                                                    | -312.0112817            | -312.1151749                 | 0.178609   | -0.0155483 | 0.187449                      | 0.040713                      | -311.9705519 |
| <b>Au (THF)</b>                            | <b>Au-N<sub>3</sub></b>                                              | -1336.400865            | -1336.680478                 | 0.287366   | -0.0447659 | 0.309967                      | 0.079782                      | -1336.468731 |
|                                            | Au-N <sub>3</sub> cycloOctyneClickTS                                 | -1648.390182            | -1648.764762                 | 0.466427   | -0.0678001 | 0.497834                      | 0.101566                      | -1648.402777 |
|                                            | <b>Au<sub>N1</sub></b>                                               | -1648.524278            | -1648.897576                 | 0.472385   | -0.0704289 | 0.502134                      | 0.095748                      | -1648.530022 |
|                                            | AuN1toN2isomerizationTS                                              | -1648.500527            | -1648.870785                 | 0.471638   | -0.0691839 | 0.502134                      | 0.094948                      | -1648.501450 |
|                                            | <b>Au<sub>N2</sub></b>                                               | -1648.531755            | -1648.900461                 | 0.472742   | -0.0682811 | 0.502263                      | 0.097882                      | -1648.532060 |
|                                            |                                                                      |                         |                              |            |            |                               |                               |              |
|                                            | AuP(CH <sub>3</sub> ) <sub>3</sub> N <sub>3</sub>                    | -761.1649753            | -761.3006787                 | 0.126565   | -0.0135970 | 0.139606                      | 0.054867                      | -761.2114305 |
|                                            | AuP(CH <sub>3</sub> ) <sub>3</sub> N <sub>3</sub> cycloOctyneClickTS | -1073.154266            | -1073.384934                 | 0.305784   | -0.0363511 | 0.327519                      | 0.074896                      | -1073.143947 |
|                                            | AuP(CH <sub>3</sub> ) <sub>3</sub> N <sub>3</sub> cycloOctyneProduct | -1073.288016            | -1073.518059                 | 0.311716   | -0.0387612 | 0.331866                      | 0.070552                      | -1073.272224 |
| <b>Re<br/>(DMSO)</b>                       | <b>Re-N<sub>3</sub></b>                                              | -1078.457350            | -1078.766416                 | 0.199196   | -0.0408405 | 0.220220                      | 0.071925                      | -1078.635226 |
|                                            | Re-N <sub>3</sub> cycloOctyneClickTS                                 | -1390.446088            | -1390.850878                 | 0.378198   | -0.0656304 | 0.408069                      | 0.094196                      | -1390.571550 |
|                                            | <b>Re<sub>N1</sub></b>                                               | -1390.584551            | -1390.981024                 | 0.384948   | -0.0686342 | 0.412937                      | 0.086961                      | -1390.694985 |
|                                            | ReN1toN2isomerizationTS                                              | -1390.551564            | -1390.947682                 | 0.383644   | -0.0697456 | 0.411254                      | 0.086821                      | -1390.664343 |
|                                            | <b>Re<sub>N2</sub></b>                                               | -1390.590465            | -1390.986143                 | 0.384732   | -0.0645756 | 0.412875                      | 0.088299                      | -1390.697004 |
| <b>Ru<br/>(C<sub>6</sub>H<sub>6</sub>)</b> | <b>Ru-N<sub>3</sub></b>                                              | -3034.102610            | -3034.767203                 | 0.765927   | -0.1809022 | 0.817797                      | 0.138321                      | -3034.222984 |
|                                            | Ru-N <sub>3</sub> cycloOctyneClickTS                                 | -3346.080393            | -3346.829010                 | 0.945198   | -0.2138496 | 1.005568                      | 0.157136                      | -3346.142573 |
|                                            | Ru-N <sub>3</sub> cycloOctyneProduct                                 | -3346.193681            | -3346.947212                 | 0.951687   | -0.2216199 | 1.010572                      | 0.152519                      | -3346.260447 |
|                                            |                                                                      |                         |                              |            |            |                               |                               |              |
|                                            | RuP(CH <sub>3</sub> ) <sub>3</sub> N <sub>3</sub>                    | -1883.655948            | -1884.035381                 | 0.443302   | -0.0889423 | 0.476204                      | 0.093735                      | -1883.710921 |
|                                            | RuP(CH <sub>3</sub> ) <sub>3</sub> N <sub>3</sub> cycloOctyneClickTS | -2195.639437            | -2196.112977                 | 0.622629   | -0.1197783 | 0.664117                      | 0.112933                      | -2195.644303 |
|                                            | RuP(CH <sub>3</sub> ) <sub>3</sub> N <sub>3</sub> cycloOctyneProduct | -2195.764332            | -2196.233333                 | 0.629223   | -0.1250369 | 0.669111                      | 0.108089                      | -2195.761679 |

**Table S11 Cont'd.** Final Energies, Enthalpy and Entropy Corrections, Gibbs Free Energies from B3LYP functional with Zero Damping Dispersion Correction-D0. In Hartree. See Computational Details for Methods.

| Metal (Solvent)                                                             | Structure                                                                | E(B3LYP/cc-pVDZ) | E(B3LYP(PCM)/cc-pVTZ) | ZPE      | D0          | H <sub>correction</sub> | S <sub>correction</sub> | G            |
|-----------------------------------------------------------------------------|--------------------------------------------------------------------------|------------------|-----------------------|----------|-------------|-------------------------|-------------------------|--------------|
| <b>Pt(II)</b><br><b>(C<sub>6</sub>H<sub>6</sub>)</b>                        | <b>Pt(II)-N<sub>3</sub></b>                                              | -1717.690972     | -1718.054753          | 0.618443 | -0.1170845  | 0.657461                | 0.107616                | -1717.586480 |
|                                                                             | Pt(II)-N <sub>3</sub> cycloOctyneClickTS                                 | -2029.665348     | -2030.122633          | 0.798756 | -0.1492831  | 0.845824                | 0.124214                | -2029.509316 |
|                                                                             | Pt(II)-N <sub>3</sub> cycloOctyneProduct                                 | -2029.802561     | -2030.254797          | 0.805156 | -0.1539903  | 0.850693                | 0.119924                | -2029.638444 |
|                                                                             |                                                                          |                  |                       |          |             |                         |                         |              |
|                                                                             | Pt(II)P(CH <sub>3</sub> ) <sub>3</sub>                                   | -1245.962269     | -1246.175479          | 0.277118 | -0.0428644  | 0.300167                | 0.074648                | -1245.968191 |
|                                                                             | Pt(II)P(CH <sub>3</sub> ) <sub>3</sub> N <sub>3</sub> cycloOctyneClickTS | -1557.949114     | -1558.256107          | 0.456503 | -0.0716184  | 0.488118                | 0.094588                | -1557.902981 |
|                                                                             | Pt(II)P(CH <sub>3</sub> ) <sub>3</sub> N <sub>3</sub> cycloOctyneProduct | -1558.084680     | -1558.387232          | 0.462364 | -0.0753415  | 0.492493                | 0.090608                | -1558.030788 |
| <b>W</b><br><b>(DMSO)</b>                                                   | <b>W-N<sub>3</sub></b>                                                   | -1071.236245     | -1071.549879          | 0.260776 | -0.0510594  | 0.283259                | 0.073804                | -1071.367128 |
|                                                                             | W-N <sub>3</sub> cycloOctyneClickTS                                      | -1382.641196     | -1383.631922          | 0.440151 | -0.0799072  | 0.471281                | 0.093700                | -1383.303327 |
|                                                                             | <b>W<sub>N1</sub></b>                                                    | -1383.357342     | -1383.757985          | 0.446884 | -0.0841009  | 0.476217                | 0.088260                | -1383.425003 |
|                                                                             | WN1toN2isomerizationTS                                                   | -1382.753024     | -1383.735666          | 0.445900 | -0.0804442  | 0.474839                | 0.088250                | -1383.400398 |
|                                                                             | <b>W<sub>N2</sub></b>                                                    | -1382.781085     | -1383.767010          | 0.446700 | -0.0788480  | 0.476169                | 0.089452                | -1383.429622 |
| <b>Pt(IV)</b><br><b>(C<sub>6</sub>H<sub>6</sub>)</b>                        | <b>Pt(IV)-N<sub>3</sub></b>                                              | -1325.737086     | -1325.981298          | 0.352443 | -0.0617869  | 0.379196                | 0.080820                | -1325.718038 |
|                                                                             | Pt(IV)-N <sub>3</sub> cycloOctyneClickTS                                 | -1637.722330     | -1638.060033          | 0.531872 | -0.0904516  | 0.567109                | 0.100079                | -1637.650428 |
|                                                                             | <b>Pt(IV)<sub>N1</sub></b>                                               | -1637.861677     | -1638.192187          | 0.538496 | -0.0952243  | 0.572073                | 0.095106                | -1637.779059 |
|                                                                             | Pt(IV)N1toN2isomerizationTS                                              | -1637.831218     | -1638.159893          | 0.536274 | -0.0918625  | 0.569904                | 0.096576                | -1637.746558 |
|                                                                             | <b>Pt(IV)<sub>N2</sub></b>                                               | -1637.870653     | -1638.198904          | 0.537858 | -0.0904980  | 0.571815                | 0.097123                | -1637.782659 |
| <b>(PtN<sub>3</sub>)<sub>4</sub></b><br><b>(C<sub>6</sub>H<sub>6</sub>)</b> | <b>(PtN<sub>3</sub>)<sub>4</sub></b>                                     | -1613.945159     | -1614.33066           | 0.497548 | -0.16679008 | 0.544877                | 0.126006                | -1614.037000 |
|                                                                             | (PtN <sub>3</sub> ) <sub>4</sub> cycloOctyneClickTS                      | -1925.900653     | -1926.38194           | 0.678575 | -0.19682025 | 0.733991                | 0.143592                | -1925.94098  |
|                                                                             | (PtN <sub>3</sub> ) <sub>4</sub> cycloOctyneProduct                      | -1926.049509     | -1926.52420           | 0.686608 | -0.20574788 | 0.739804                | 0.137470                | -1926.082248 |
|                                                                             |                                                                          |                  |                       |          |             |                         |                         |              |
|                                                                             | Pt(CH <sub>3</sub> ) <sub>3</sub> N <sub>3</sub>                         | -403.4286385     | -403.539221           | 0.121835 | -0.01254500 | 0.134056                | 0.051586                | -403.4522727 |
|                                                                             | Pt(CH <sub>3</sub> ) <sub>3</sub> N <sub>3</sub> cycloOctyneClickTS      | -715.4190124     | -715.6239696          | 0.301254 | -0.03732541 | 0.322014                | 0.072010                | -715.3875277 |
|                                                                             | Pt(CH <sub>3</sub> ) <sub>3</sub> N <sub>3</sub> cycloOctyneProduct      | -715.5486168     | -715.7518136          | 0.307045 | -0.03985185 | 0.326108                | 0.066568                | -715.5101580 |

**Table S12.** Final Energies, Enthalpy and Entropy Corrections, Gibbs Free Energies from B3LYP functional with Zero Damping Dispersion Correction-D0 and SMD solvent model. In Hartree. See Computational Details for Methods.

| Metal (Solvent)                        | Structure                                                            | E(B3LYP/cc-pVDZ) | E(B3LYP(SMD)/cc-pVTZ) | ZPE      | D0         | H <sub>correction</sub> | S <sub>correction</sub> | G            |
|----------------------------------------|----------------------------------------------------------------------|------------------|-----------------------|----------|------------|-------------------------|-------------------------|--------------|
|                                        | CycloOctyne (Benzene)                                                | -312.0112817     | -312.1229881          | 0.178609 | -0.0155483 | 0.187449                | 0.040713                | -311.9783651 |
|                                        | CycloOctyne (DMSO)                                                   | -312.0112817     | -312.1203944          | 0.178609 | -0.0155483 | 0.187449                | 0.040713                | -311.9757714 |
|                                        | CycloOctyne (THF)                                                    | -312.0112817     | -312.1226055          | 0.178609 | -0.0155483 | 0.187449                | 0.040713                | -311.9779825 |
| <b>Au (THF)</b>                        | <b>Au-N<sub>3</sub></b>                                              | -1336.400865     | -1336.690975          | 0.287366 | -0.0447659 | 0.309967                | 0.079782                | -1336.479228 |
|                                        | Au-N <sub>3</sub> cycloOctyneClickTS                                 | -1648.390182     | -1648.783155          | 0.466427 | -0.0678001 | 0.497834                | 0.101566                | -1648.421170 |
|                                        | <b>AuN<sub>1</sub></b>                                               | -1648.524278     | -1648.917716          | 0.472385 | -0.0704289 | 0.502134                | 0.095748                | -1648.550162 |
|                                        | AuN <sub>1</sub> toN <sub>2</sub> isomerizationTS                    | -1648.500527     | -1648.890789          | 0.471638 | -0.0691839 | 0.502134                | 0.094948                | -1648.521454 |
|                                        | <b>AuN<sub>2</sub></b>                                               | -1648.531755     | -1648.920382          | 0.472742 | -0.0682811 | 0.502263                | 0.097882                | -1648.551982 |
|                                        |                                                                      |                  |                       |          |            |                         |                         |              |
|                                        | AuP(CH <sub>3</sub> ) <sub>3</sub> N <sub>3</sub>                    | -761.1649753     | -761.2996061          | 0.126565 | -0.0135970 | 0.139606                | 0.054867                | -761.2103579 |
|                                        | AuP(CH <sub>3</sub> ) <sub>3</sub> N <sub>3</sub> cycloOctyneClickTS | -1073.154266     | -1073.391857          | 0.305784 | -0.0363511 | 0.327519                | 0.074896                | -1073.150870 |
|                                        | AuP(CH <sub>3</sub> ) <sub>3</sub> N <sub>3</sub> cycloOctyneProduct | -1073.288016     | -1073.526520          | 0.311716 | -0.0387612 | 0.331866                | 0.070552                | -1073.280685 |
| <b>Re (DMSO)</b>                       | <b>Re-N<sub>3</sub></b>                                              | -1078.457350     | -1078.770755          | 0.199196 | -0.0408405 | 0.220220                | 0.071925                | -1078.639566 |
|                                        | Re-N <sub>3</sub> cycloOctyneClickTS                                 | -1390.446088     | -1390.861903          | 0.378198 | -0.0656304 | 0.408069                | 0.094196                | -1390.582575 |
|                                        | <b>ReN<sub>1</sub></b>                                               | -1390.584551     | -1390.992991          | 0.384948 | -0.0686342 | 0.412937                | 0.086961                | -1390.706952 |
|                                        | ReN <sub>1</sub> toN <sub>2</sub> isomerizationTS                    | -1390.551564     | -1390.959479          | 0.383644 | -0.0697456 | 0.411254                | 0.086821                | -1390.676141 |
|                                        | <b>ReN<sub>2</sub></b>                                               | -1390.590465     | -1390.997702          | 0.384732 | -0.0645756 | 0.412875                | 0.088299                | -1390.708563 |
| <b>Ru (C<sub>6</sub>H<sub>6</sub>)</b> | <b>Ru-N<sub>3</sub></b>                                              | -3034.102610     | -3034.801162          | 0.765927 | -0.1809022 | 0.817797                | 0.138321                | -3034.256942 |
|                                        | Ru-N <sub>3</sub> cycloOctyneClickTS                                 | -3346.080393     | -3346.870766          | 0.945198 | -0.2138496 | 1.005568                | 0.157136                | -3346.184329 |
|                                        | Ru-N <sub>3</sub> cycloOctyneProduct                                 | -3346.193681     | -3346.988769          | 0.951687 | -0.2216199 | 1.010572                | 0.152519                | -3346.302004 |
|                                        |                                                                      |                  |                       |          |            |                         |                         |              |
|                                        | RuP(CH <sub>3</sub> ) <sub>3</sub> N <sub>3</sub>                    | -1883.655948     | -1884.045108          | 0.443302 | -0.0889423 | 0.476204                | 0.093735                | -1883.720648 |
|                                        | RuP(CH <sub>3</sub> ) <sub>3</sub> N <sub>3</sub> cycloOctyneClickTS | -2195.639437     | -2196.13046           | 0.622629 | -0.1197783 | 0.664117                | 0.112933                | -2195.661787 |
|                                        | RuP(CH <sub>3</sub> ) <sub>3</sub> N <sub>3</sub> cycloOctyneProduct | -2195.764332     | -2196.251424          | 0.629223 | -0.1250369 | 0.669111                | 0.108089                | -2195.779769 |

**Table S12 Cont'd.** Final Energies, Enthalpy and Entropy Corrections, Gibbs Free Energies from B3LYP functional with Zero Damping Dispersion Correction-D0 and SMD solvent model. In Hartree. See Computational Details for Methods.

| <b>Metal<br/>(Solvent)</b>                                            | <b>Structure</b>                                                         | <b>E(B3LYP/cc-pVDZ)</b> | <b>E(B3LYP(SMD)/cc-pVTZ)</b> | <b>ZPE</b> | <b>D0</b>   | <b>H<sub>correction</sub></b> | <b>S<sub>correction</sub></b> | <b>G</b>     |
|-----------------------------------------------------------------------|--------------------------------------------------------------------------|-------------------------|------------------------------|------------|-------------|-------------------------------|-------------------------------|--------------|
| <b>Pt(II)<br/>(C<sub>6</sub>H<sub>6</sub>)</b>                        | <b>Pt(II)-N<sub>3</sub></b>                                              | -1717.690972            | -1718.065656                 | 0.618443   | -0.1170845  | 0.657461                      | 0.107616                      | -1717.597382 |
|                                                                       | Pt(II)-N <sub>3</sub> cycloOctyneClickTS                                 | -2029.665348            | -2030.140972                 | 0.798756   | -0.1492831  | 0.845824                      | 0.124214                      | -2029.527654 |
|                                                                       | Pt(II)-N <sub>3</sub> cycloOctyneProduct                                 | -2029.802561            | -2030.272943                 | 0.805156   | -0.1539903  | 0.850693                      | 0.119924                      | -2029.656590 |
|                                                                       |                                                                          |                         |                              |            |             |                               |                               |              |
|                                                                       | Pt(II)P(CH <sub>3</sub> ) <sub>3</sub>                                   | -1245.962269            | -1246.175558                 | 0.277118   | -0.0428644  | 0.300167                      | 0.074648                      | -1245.968270 |
|                                                                       | Pt(II)P(CH <sub>3</sub> ) <sub>3</sub> N <sub>3</sub> cycloOctyneClickTS | -1557.949114            | -1558.264622                 | 0.456503   | -0.0716184  | 0.488118                      | 0.094588                      | -1557.911496 |
|                                                                       | Pt(II)P(CH <sub>3</sub> ) <sub>3</sub> N <sub>3</sub> cycloOctyneProduct | -1558.084680            | -1558.396407                 | 0.462364   | -0.0753415  | 0.492493                      | 0.090608                      | -1558.039962 |
| <b>W (DMSO)</b>                                                       | <b>W-N<sub>3</sub></b>                                                   | -1071.236245            | -1071.556186                 | 0.260776   | -0.0510594  | 0.283259                      | 0.073804                      | -1071.373435 |
|                                                                       | W-N <sub>3</sub> cycloOctyneClickTS                                      | -1382.641196            | -1383.644398                 | 0.440151   | -0.0799072  | 0.471281                      | 0.093700                      | -1383.315803 |
|                                                                       | <b>W<sub>N1</sub></b>                                                    | -1383.357342            | -1383.771627                 | 0.446884   | -0.0841009  | 0.476217                      | 0.088260                      | -1383.438645 |
|                                                                       | WN1toN2isomerizationTS                                                   | -1382.753024            | -1383.749388                 | 0.445900   | -0.0804442  | 0.474839                      | 0.088250                      | -1383.414120 |
|                                                                       | <b>W<sub>N2</sub></b>                                                    | -1382.781085            | -1383.780834                 | 0.446700   | -0.0788480  | 0.476169                      | 0.089452                      | -1383.443445 |
| <b>Pt(IV)<br/>(C<sub>6</sub>H<sub>6</sub>)</b>                        | <b>Pt(IV)-N<sub>3</sub></b>                                              | -1325.737086            | -1325.983030                 | 0.352443   | -0.0617869  | 0.379196                      | 0.080820                      | -1325.719770 |
|                                                                       | Pt(IV)-N <sub>3</sub> cycloOctyneClickTS                                 | -1637.722330            | -1638.070634                 | 0.531872   | -0.0904516  | 0.567109                      | 0.100079                      | -1637.661030 |
|                                                                       | <b>Pt(IV)<sub>N1</sub></b>                                               | -1637.861677            | -1638.203100                 | 0.538496   | -0.0952243  | 0.572073                      | 0.095106                      | -1637.789973 |
|                                                                       | Pt(IV)N1toN2isomerizationTS                                              | -1637.831218            | -1638.170305                 | 0.536274   | -0.0918625  | 0.569904                      | 0.096576                      | -1637.756969 |
|                                                                       | <b>Pt(IV)<sub>N2</sub></b>                                               | -1637.870653            | -1638.210777                 | 0.537858   | -0.0904980  | 0.571815                      | 0.097123                      | -1637.794532 |
| <b>(PtN<sub>3</sub>)<sub>4</sub><br/>(C<sub>6</sub>H<sub>6</sub>)</b> | <b>(PtN<sub>3</sub>)<sub>4</sub></b>                                     | -1613.945159            | -1614.326721                 | 0.497548   | -0.16679008 | 0.544877                      | 0.126006                      | -1614.033058 |
|                                                                       | (PtN <sub>3</sub> ) <sub>4</sub> cycloOctyneClickTS                      | -1925.900653            | -1926.385683                 | 0.678575   | -0.19682025 | 0.733991                      | 0.143592                      | -1925.944718 |
|                                                                       | (PtN <sub>3</sub> ) <sub>4</sub> cycloOctyneProduct                      | -1926.049509            | -1926.527500                 | 0.686608   | -0.20574788 | 0.739804                      | 0.137470                      | -1926.085548 |
|                                                                       |                                                                          |                         |                              |            |             |                               |                               |              |
|                                                                       | Pt(CH <sub>3</sub> ) <sub>3</sub> N <sub>3</sub>                         | -403.4286385            | -403.5331834                 | 0.121835   | -0.01254500 | 0.134056                      | 0.051586                      | -403.4462350 |
|                                                                       | Pt(CH <sub>3</sub> ) <sub>3</sub> N <sub>3</sub> cycloOctyneClickTS      | -715.4190124            | -715.6274874                 | 0.301254   | -0.03732541 | 0.322014                      | 0.072010                      | -715.3910455 |
|                                                                       | Pt(CH <sub>3</sub> ) <sub>3</sub> N <sub>3</sub> cycloOctyneProduct      | -715.5486168            | -715.7562360                 | 0.307045   | -0.03985185 | 0.326108                      | 0.066568                      | -715.5145804 |

**Table S13.** Final Energies, Enthalpy and Entropy Corrections, Gibbs Free Energies from CAM-B3LYP with Zero Damping Dispersion Correction-D0 and SMD solvent model. In Hartree. See Computational Details for Methods.

| Metal (Solvent)                        | Structure                                                            | E(B3LYP/cc-pVDZ) | E(CAM-B3LYP(SMD)/cc-pVTZ) | ZPE      | D0         | H <sub>correction</sub> | S <sub>correction</sub> | G            |
|----------------------------------------|----------------------------------------------------------------------|------------------|---------------------------|----------|------------|-------------------------|-------------------------|--------------|
|                                        | CycloOctyne (Benzene)                                                | -312.0112817     | -311.9278447              | 0.178609 | -0.0106438 | 0.187449                | 0.040713                | -311.7783172 |
|                                        | CycloOctyne (DMSO)                                                   | -312.0112817     | -311.9253923              | 0.178609 | -0.0106438 | 0.187449                | 0.040713                | -311.7758648 |
|                                        | CycloOctyne (THF)                                                    | -312.0112817     | -311.9275593              | 0.178609 | -0.0106438 | 0.187449                | 0.040713                | -311.7780318 |
| <b>Au (THF)</b>                        | <b>Au-N<sub>3</sub></b>                                              | -1336.400865     | -1336.101311              | 0.287366 | -0.0312787 | 0.309967                | 0.079782                | -1335.876077 |
|                                        | Au-N <sub>3</sub> cycloOctyneClickTS                                 | -1648.390182     | -1647.999001              | 0.466427 | -0.0473311 | 0.497834                | 0.101566                | -1647.616547 |
|                                        | <b>Au<sub>N1</sub></b>                                               | -1648.524278     | -1648.149641              | 0.472385 | -0.0492827 | 0.502134                | 0.095748                | -1647.760941 |
|                                        | AuN1toN2isomerizationTS                                              | -1648.500527     | -1648.121927              | 0.471638 | -0.0483791 | 0.502134                | 0.094948                | -1647.731787 |
|                                        | <b>Au<sub>N2</sub></b>                                               | -1648.531755     | -1648.152366              | 0.472742 | -0.0477090 | 0.502263                | 0.097882                | -1647.763393 |
|                                        |                                                                      |                  |                           |          |            |                         |                         |              |
|                                        | AuP(CH <sub>3</sub> ) <sub>3</sub> N <sub>3</sub>                    | -761.1649753     | -761.0384849              | 0.126565 | -0.0093130 | 0.139606                | 0.054867                | -760.9449527 |
|                                        | AuP(CH <sub>3</sub> ) <sub>3</sub> N <sub>3</sub> cycloOctyneClickTS | -1073.154266     | -1072.936252              | 0.305784 | -0.0250934 | 0.327519                | 0.074896                | -1072.684007 |
|                                        | AuP(CH <sub>3</sub> ) <sub>3</sub> N <sub>3</sub> cycloOctyneProduct | -1073.288016     | -1073.086890              | 0.311716 | -0.0268416 | 0.331866                | 0.070552                | -1072.829136 |
| <b>Re (DMSO)</b>                       | <b>Re-N<sub>3</sub></b>                                              | -1078.457350     | -1078.214697              | 0.199196 | -0.0283039 | 0.220220                | 0.071925                | -1078.070971 |
|                                        | Re-N <sub>3</sub> cycloOctyneClickTS                                 | -1390.446088     | -1390.111471              | 0.378198 | -0.0457526 | 0.408069                | 0.094196                | -1389.812266 |
|                                        | <b>Re<sub>N1</sub></b>                                               | -1390.584551     | -1390.259725              | 0.384948 | -0.0480141 | 0.412937                | 0.086961                | -1389.953066 |
|                                        | ReN1toN2isomerizationTS                                              | -1390.551564     | -1390.224398              | 0.383644 | -0.0487082 | 0.411254                | 0.086821                | -1389.920023 |
|                                        | <b>Re<sub>N2</sub></b>                                               | -1390.590465     | -1390.263751              | 0.384732 | -0.0452963 | 0.412875                | 0.088299                | -1389.955332 |
| <b>Ru (C<sub>6</sub>H<sub>6</sub>)</b> | <b>Ru-N<sub>3</sub></b>                                              | -3034.102610     | -3033.471868              | 0.765927 | -0.1275687 | 0.817797                | 0.138321                | -3032.874315 |
|                                        | Ru-N <sub>3</sub> cycloOctyneClickTS                                 | -3346.080393     | -3345.347836              | 0.945198 | -0.1510490 | 1.005568                | 0.157136                | -3344.598598 |
|                                        | Ru-N <sub>3</sub> cycloOctyneProduct                                 | -3346.193681     | -3345.483865              | 0.951687 | -0.1566343 | 1.010572                | 0.152519                | -3344.732115 |
|                                        |                                                                      |                  |                           |          |            |                         |                         |              |
|                                        | RuP(CH <sub>3</sub> ) <sub>3</sub> N <sub>3</sub>                    | -1883.655948     | -1883.368548              | 0.443302 | -0.0621572 | 0.476204                | 0.093735                | -1883.017304 |
|                                        | RuP(CH <sub>3</sub> ) <sub>3</sub> N <sub>3</sub> cycloOctyneClickTS | -2195.639437     | -2195.259908              | 0.622629 | -0.0838714 | 0.664117                | 0.112933                | -2194.755328 |
|                                        | RuP(CH <sub>3</sub> ) <sub>3</sub> N <sub>3</sub> cycloOctyneProduct | -2195.764332     | -2195.398533              | 0.629223 | -0.0877451 | 0.669111                | 0.108089                | -2194.889587 |

**Table S13 Cont'd.** Final Energies, Enthalpy and Entropy Corrections, Gibbs Free Energies from CAM-B3LYP with Zero Damping Dispersion Correction-D0 and SMD solvent model. In Hartree. See Computational Details for Methods.

| Metal (Solvent)                                                   | Structure                                                                | E(B3LYP/cc-pVDZ) | E(CAM-B3LYP/cc-pVTZ) | ZPE      | D0          | H <sub>correction</sub> | S <sub>correction</sub> | G            |
|-------------------------------------------------------------------|--------------------------------------------------------------------------|------------------|----------------------|----------|-------------|-------------------------|-------------------------|--------------|
| <b>Pt(II) (C<sub>6</sub>H<sub>6</sub>)</b>                        | <b>Pt(II)-N<sub>3</sub></b>                                              | -1717.690972     | -1717.39231          | 0.618443 | -0.0821357  | 0.657461                | 0.107616                | -1716.889088 |
|                                                                   | Pt(II)-N <sub>3</sub> cycloOctyneClickTS                                 | -2029.665348     | -2029.274564         | 0.798756 | -0.1051803  | 0.845824                | 0.124214                | -2028.617143 |
|                                                                   | Pt(II)-N <sub>3</sub> cycloOctyneProduct                                 | -2029.802561     | -2029.42349          | 0.805156 | -0.1084467  | 0.850693                | 0.119924                | -2028.761593 |
|                                                                   |                                                                          |                  |                      |          |             |                         |                         |              |
|                                                                   | Pt(II)P(CH <sub>3</sub> ) <sub>3</sub>                                   | -1245.962269     | -1245.796973         | 0.277118 | -0.0296982  | 0.300167                | 0.074648                | -1245.576519 |
|                                                                   | Pt(II)P(CH <sub>3</sub> ) <sub>3</sub> N <sub>3</sub> cycloOctyneClickTS | -1557.949114     | -1557.692539         | 0.456503 | -0.0498712  | 0.488118                | 0.094588                | -1557.317666 |
|                                                                   | Pt(II)P(CH <sub>3</sub> ) <sub>3</sub> N <sub>3</sub> cycloOctyneProduct | -1558.084680     | -1557.840762         | 0.462364 | -0.0524398  | 0.492493                | 0.090608                | -1557.461417 |
| <b>W (DMSO)</b>                                                   | <b>W-N<sub>3</sub></b>                                                   | -1071.236245     | -1070.9726           | 0.260776 | -0.0356631  | 0.283259                | 0.073804                | -1070.774453 |
|                                                                   | W-N <sub>3</sub> cycloOctyneClickTS                                      | -1382.641196     | -1382.86685          | 0.440151 | -0.0558602  | 0.471281                | 0.093700                | -1382.514209 |
|                                                                   | <b>W<sub>N1</sub></b>                                                    | -1383.357342     | -1383.011999         | 0.446884 | -0.0590106  | 0.476217                | 0.088260                | -1382.653927 |
|                                                                   | WN1toN2isomerizationTS                                                   | -1382.753024     | -1382.988549         | 0.445900 | -0.0564015  | 0.474839                | 0.088250                | -1382.629239 |
|                                                                   | <b>W<sub>N2</sub></b>                                                    | -1382.781085     | -1383.020192         | 0.446700 | -0.0554063  | 0.476169                | 0.089452                | -1382.659362 |
| <b>Pt(IV) (C<sub>6</sub>H<sub>6</sub>)</b>                        | <b>Pt(IV)-N<sub>3</sub></b>                                              | -1325.737086     | -1325.54841          | 0.352443 | -0.0428604  | 0.379196                | 0.080820                | -1325.266224 |
|                                                                   | Pt(IV)-N <sub>3</sub> cycloOctyneClickTS                                 | -1637.722330     | -1637.442415         | 0.531872 | -0.06306    | 0.567109                | 0.100079                | -1637.005418 |
|                                                                   | <b>Pt(IV)<sub>N1</sub></b>                                               | -1637.861677     | -1637.592517         | 0.538496 | -0.0664974  | 0.572073                | 0.095106                | -1637.150662 |
|                                                                   | Pt(IV)N1toN2isomerizationTS                                              | -1637.831218     | -1637.555619         | 0.536274 | -0.0640976  | 0.569904                | 0.096576                | -1637.114519 |
|                                                                   | <b>Pt(IV)<sub>N2</sub></b>                                               | -1637.870653     | -1637.599573         | 0.537858 | -0.0631975  | 0.571815                | 0.097123                | -1637.156027 |
| <b>(PtN<sub>3</sub>)<sub>4</sub> (C<sub>6</sub>H<sub>6</sub>)</b> | <b>(PtN<sub>3</sub>)<sub>4</sub></b>                                     | -1613.945159     | -1613.34442          | 0.497548 | -0.11646504 | 0.544877                | 0.126006                | -1613.000432 |
|                                                                   | (PtN <sub>3</sub> ) <sub>4</sub> cycloOctyneClickTS                      | -1925.900653     | -1925.205207         | 0.678575 | -0.13829188 | 0.733991                | 0.143592                | -1924.705714 |
|                                                                   | (PtN <sub>3</sub> ) <sub>4</sub> cycloOctyneProduct                      | -1926.049509     | -1925.367453         | 0.686608 | -0.14454502 | 0.739804                | 0.137470                | -1924.864299 |
|                                                                   |                                                                          |                  |                      |          |             |                         |                         |              |
|                                                                   | Pt(CH <sub>3</sub> ) <sub>3</sub> N <sub>3</sub>                         | -403.4286385     | -403.2755598         | 0.121835 | -0.00873364 | 0.134056                | 0.051586                | -403.1848001 |
|                                                                   | Pt(CH <sub>3</sub> ) <sub>3</sub> N <sub>3</sub> cycloOctyneClickTS      | -715.4190124     | -715.1751089         | 0.301254 | -0.02594437 | 0.322014                | 0.07201                 | -714.9272860 |
|                                                                   | Pt(CH <sub>3</sub> ) <sub>3</sub> N <sub>3</sub> cycloOctyneProduct      | -715.5486168     | -715.3209902         | 0.307045 | -0.02779766 | 0.326108                | 0.066568                | -715.0672805 |

**Table S14.** Final Energies, Enthalpy and Entropy Corrections, Gibbs Free Energies from MN15 functional (includes dispersion correction) and SMD solvent correction. In Hartree. See Computational Details for Methods.

| <b>Metal (Solvent)</b>                        | <b>Structure</b>                                                     | <b>E(B3LYP/cc-pVDZ)</b> | <b>E(MN15 (SMD)/cc-pVTZ)</b> | <b>ZPE</b> | <b>D0</b>  | <b>H<sub>correction</sub></b> | <b>S<sub>correction</sub></b> | <b>G</b>     |
|-----------------------------------------------|----------------------------------------------------------------------|-------------------------|------------------------------|------------|------------|-------------------------------|-------------------------------|--------------|
|                                               | CycloOctyne (Benzene)                                                | -312.0112817            | -311.7046162                 | 0.178609   | -0.0155483 | 0.187449                      | 0.040713                      | -311.5444449 |
|                                               | CycloOctyne (DMSO)                                                   | -312.0112817            | -311.7019359                 | 0.178609   | -0.0155483 | 0.187449                      | 0.040713                      | -311.5417646 |
|                                               | CycloOctyne (THF)                                                    | -312.0112817            | -311.7041935                 | 0.178609   | -0.0155483 | 0.187449                      | 0.040713                      | -311.5440222 |
| <b><u>Au (THF)</u></b>                        | <b>Au-N<sub>3</sub></b>                                              | -1336.400865            | -1335.219183                 | 0.287366   | -0.0447659 | 0.309967                      | 0.079782                      | -1334.962670 |
|                                               | Au-N <sub>3</sub> cycloOctyneClickTS                                 | -1648.390182            | -1646.896975                 | 0.466427   | -0.0678001 | 0.497834                      | 0.101566                      | -1646.467191 |
|                                               | <b>Au<sub>N1</sub></b>                                               | -1648.524278            | -1647.051565                 | 0.472385   | -0.0704289 | 0.502134                      | 0.095748                      | -1646.613582 |
|                                               | AuN1toN2isomerizationTS                                              | -1648.500527            | -1647.024191                 | 0.471638   | -0.0691839 | 0.502134                      | 0.094948                      | -1646.585673 |
|                                               | <b>Au<sub>N2</sub></b>                                               | -1648.531755            | -1647.052979                 | 0.472742   | -0.0682811 | 0.502263                      | 0.097882                      | -1646.616298 |
|                                               |                                                                      |                         |                              |            |            |                               |                               |              |
|                                               | AuP(CH <sub>3</sub> ) <sub>3</sub> N <sub>3</sub>                    | -761.1649753            | -760.5297165                 | 0.126565   | -0.0135970 | 0.139606                      | 0.054867                      | -760.4268714 |
|                                               | AuP(CH <sub>3</sub> ) <sub>3</sub> N <sub>3</sub> cycloOctyneClickTS | -1073.154266            | -1072.207414                 | 0.305784   | -0.0363511 | 0.327519                      | 0.074896                      | -1071.930076 |
|                                               | AuP(CH <sub>3</sub> ) <sub>3</sub> N <sub>3</sub> cycloOctyneProduct | -1073.288016            | -1072.362008                 | 0.311716   | -0.0387612 | 0.331866                      | 0.070552                      | -1072.077412 |
| <b><u>Re (DMSO)</u></b>                       | <b>Re-N<sub>3</sub></b>                                              | -1078.457350            | -1077.508649                 | 0.199196   | -0.0408405 | 0.220220                      | 0.071925                      | -1077.336619 |
|                                               | Re-N <sub>3</sub> cycloOctyneClickTS                                 | -1390.446088            | -1389.186366                 | 0.378198   | -0.0656304 | 0.408069                      | 0.094196                      | -1388.841408 |
|                                               | <b>Re<sub>N1</sub></b>                                               | -1390.584551            | -1389.339872                 | 0.384948   | -0.0686342 | 0.412937                      | 0.086961                      | -1388.985199 |
|                                               | ReN1toN2isomerizationTS                                              | -1390.551564            | -1389.295581                 | 0.383644   | -0.0697456 | 0.411254                      | 0.086821                      | -1388.942498 |
|                                               | <b>Re<sub>N2</sub></b>                                               | -1390.590465            | -1389.341226                 | 0.384732   | -0.0645756 | 0.412875                      | 0.088299                      | -1388.987511 |
| <b><u>Ru (C<sub>6</sub>H<sub>6</sub>)</u></b> | <b>Ru-N<sub>3</sub></b>                                              | -3034.102610            | -3031.644069                 | 0.765927   | -0.1809022 | 0.817797                      | 0.138321                      | -3030.918947 |
|                                               | Ru-N <sub>3</sub> cycloOctyneClickTS                                 | -3346.080393            | -3343.306304                 | 0.945198   | -0.2138496 | 1.005568                      | 0.157136                      | -3342.406017 |
|                                               | Ru-N <sub>3</sub> cycloOctyneProduct                                 | -3346.193681            | -3343.454386                 | 0.951687   | -0.2216199 | 1.010572                      | 0.152519                      | -3342.546002 |
|                                               |                                                                      |                         |                              |            |            |                               |                               |              |
|                                               | RuP(CH <sub>3</sub> ) <sub>3</sub> N <sub>3</sub>                    | -1883.655948            | -1882.268854                 | 0.443302   | -0.0889423 | 0.476204                      | 0.093735                      | -1881.855453 |
|                                               | RuP(CH <sub>3</sub> ) <sub>3</sub> N <sub>3</sub> cycloOctyneClickTS | -2195.639437            | -2193.946415                 | 0.622629   | -0.1197783 | 0.664117                      | 0.112933                      | -2193.357963 |
|                                               | RuP(CH <sub>3</sub> ) <sub>3</sub> N <sub>3</sub> cycloOctyneProduct | -2195.764332            | -2194.093667                 | 0.629223   | -0.1250369 | 0.669111                      | 0.108089                      | -2193.496976 |



**Table S14 Cont'd.** Final Energies, Enthalpy and Entropy Corrections, Gibbs Free Energies from MN15 functional (includes dispersion correction) and SMD solvent correction. In Hartree. See Computational Details for Methods.

| Metal (Solvent)                                                             | Structure                                                                | E(B3LYP/cc-pVDZ) | E(MN15(SMD)/cc-pVTZ) | ZPE      | H <sub>correction</sub> | S <sub>correction</sub> | G            |
|-----------------------------------------------------------------------------|--------------------------------------------------------------------------|------------------|----------------------|----------|-------------------------|-------------------------|--------------|
| <b>Pt(II)</b><br><b>(C<sub>6</sub>H<sub>6</sub>)</b>                        | <b>Pt(II)-N<sub>3</sub></b>                                              | -1717.690972     | -1716.381805         | 0.618443 | 0.657461                | 0.107616                | -1715.796447 |
|                                                                             | Pt(II)-N <sub>3</sub> cycloOctyneClickTS                                 | -2029.665348     | -2028.051258         | 0.798756 | 0.845824                | 0.124214                | -2027.288658 |
|                                                                             | Pt(II)-N <sub>3</sub> cycloOctyneProduct                                 | -2029.802561     | -2028.206937         | 0.805156 | 0.850693                | 0.119924                | -2027.436593 |
|                                                                             | Pt(II)P(CH <sub>3</sub> ) <sub>3</sub>                                   | -1245.962269     | -1245.098357         | 0.277118 | 0.300167                | 0.074648                | -1244.848205 |
|                                                                             | Pt(II)P(CH <sub>3</sub> ) <sub>3</sub> N <sub>3</sub> cycloOctyneClickTS | -1557.949114     | -1556.778916         | 0.456503 | 0.488118                | 0.094588                | -1556.354172 |
|                                                                             | Pt(II)P(CH <sub>3</sub> ) <sub>3</sub> N <sub>3</sub> cycloOctyneProduct | -1558.084680     | -1556.931636         | 0.462364 | 0.492493                | 0.090608                | -1556.499851 |
| <b>W (DMSO)</b>                                                             | <b>W-N<sub>3</sub></b>                                                   | -1071.236245     | -1070.288199         | 0.260776 | 0.283259                | 0.073804                | -1070.054389 |
|                                                                             | W-N <sub>3</sub> cycloOctyneClickTS                                      | -1382.641196     | -1381.967672         | 0.440151 | 0.471281                | 0.093700                | -1381.55917  |
|                                                                             | <b>W<sub>N1</sub></b>                                                    | -1383.357342     | -1382.118006         | 0.446884 | 0.476217                | 0.088260                | -1381.700923 |
|                                                                             | WN1toN2isomerizationTS                                                   | -1382.753024     | -1382.094587         | 0.445900 | 0.474839                | 0.088250                | -1381.678876 |
|                                                                             | <b>W<sub>N2</sub></b>                                                    | -1382.781085     | -1382.122936         | 0.446700 | 0.476169                | 0.089452                | -1381.7067   |
| <b>Pt(IV)</b><br><b>(C<sub>6</sub>H<sub>6</sub>)</b>                        | <b>Pt(IV)-N<sub>3</sub></b>                                              | -1325.737086     | -1324.801589         | 0.352443 | 0.379196                | 0.080820                | -1324.476542 |
|                                                                             | Pt(IV)-N <sub>3</sub> cycloOctyneClickTS                                 | -1637.722330     | -1636.482448         | 0.531872 | 0.567109                | 0.100079                | -1635.982392 |
|                                                                             | <b>Pt(IV)<sub>N1</sub></b>                                               | -1637.861677     | -1636.638174         | 0.538496 | 0.572073                | 0.095106                | -1636.129822 |
|                                                                             | Pt(IV)N1toN2isomerizationTS                                              | -1637.831218     | -1636.600388         | 0.536274 | 0.569904                | 0.096576                | -1636.09519  |
|                                                                             | <b>Pt(IV)<sub>N2</sub></b>                                               | -1637.870653     | -1636.64119          | 0.537858 | 0.571815                | 0.097123                | -1636.134447 |
| <b>(PtN<sub>3</sub>)<sub>4</sub></b><br><b>(C<sub>6</sub>H<sub>6</sub>)</b> | <b>(PtN<sub>3</sub>)<sub>4</sub></b>                                     | -1613.945159     | -1612.070135         | 0.497548 | 0.544877                | 0.126006                | -1611.609682 |
|                                                                             | (PtN <sub>3</sub> ) <sub>4</sub> cycloOctyneClickTS                      | -1925.900653     | -1923.71596          | 0.678575 | 0.733991                | 0.143592                | -1923.078176 |
|                                                                             | (PtN <sub>3</sub> ) <sub>4</sub> cycloOctyneProduct                      | -1926.049509     | -1923.883715         | 0.686608 | 0.739804                | 0.137470                | -1923.236016 |
|                                                                             | Pt(CH <sub>3</sub> ) <sub>3</sub> N <sub>3</sub>                         | -403.4286385     | -402.9381539         | 0.121835 | 0.134056                | 0.051586                | -402.8386605 |
|                                                                             | Pt(CH <sub>3</sub> ) <sub>3</sub> N <sub>3</sub> cycloOctyneClickTS      | -715.4190124     | -714.6198300         | 0.301254 | 0.322014                | 0.072010                | -714.3460627 |
|                                                                             | Pt(CH <sub>3</sub> ) <sub>3</sub> N <sub>3</sub> cycloOctyneProduct      | -715.5486168     | -714.7669951         | 0.307045 | 0.326108                | 0.066568                | -714.4854877 |

**Table S15.** Final Energies, Enthalpy and Entropy Corrections, Gibbs Free Energies from  $\omega$ B97xD functional (includes dispersion correction) and SMD solvent correction. In Hartree. See Computational Details for Methods.

| <b>Metal (Solvent)</b>                        | <b>Structure</b>                                                     | <b>E(B3LYP/cc-pVDZ)</b> | <b>E(<math>\omega</math>B97xD (SMD)/cc-pVTZ)</b> | <b>ZPE</b> | <b>D0</b>  | <b>H<sub>correction</sub></b> | <b>S<sub>correction</sub></b> | <b>G</b>     |
|-----------------------------------------------|----------------------------------------------------------------------|-------------------------|--------------------------------------------------|------------|------------|-------------------------------|-------------------------------|--------------|
|                                               | CycloOctyne (Benzene)                                                | -312.0112817            | -312.016304                                      | 0.178609   | -0.0155483 | 0.187449                      | 0.040713                      | -311.8561327 |
|                                               | CycloOctyne (DMSO)                                                   | -312.0112817            | -312.0139966                                     | 0.178609   | -0.0155483 | 0.187449                      | 0.040713                      | -311.8538253 |
|                                               | CycloOctyne (THF)                                                    | -312.0112817            | -312.0161115                                     | 0.178609   | -0.0155483 | 0.187449                      | 0.040713                      | -311.8559402 |
| <b><u>Au (THF)</u></b>                        | <b>Au-N<sub>3</sub></b>                                              | -1336.400865            | -1336.376668                                     | 0.287366   | -0.0447659 | 0.309967                      | 0.079782                      | -1336.120155 |
|                                               | Au-N <sub>3</sub> cycloOctyneClickTS                                 | -1648.390182            | -1648.368291                                     | 0.466427   | -0.0678001 | 0.497834                      | 0.101566                      | -1647.938506 |
|                                               | <b>Au<sub>N1</sub></b>                                               | -1648.524278            | -1648.524698                                     | 0.472385   | -0.0704289 | 0.502134                      | 0.095748                      | -1648.086715 |
|                                               | AuN1toN2isomerizationTS                                              | -1648.500527            | -1648.496328                                     | 0.471638   | -0.0691839 | 0.502134                      | 0.094948                      | -1648.057809 |
|                                               | <b>Au<sub>N2</sub></b>                                               | -1648.531755            | -1648.524462                                     | 0.472742   | -0.0682811 | 0.502263                      | 0.097882                      | -1648.08778  |
|                                               |                                                                      |                         |                                                  |            |            |                               |                               |              |
|                                               | AuP(CH <sub>3</sub> ) <sub>3</sub> N <sub>3</sub>                    | -761.1649753            | -761.1911875                                     | 0.126565   | -0.0135970 | 0.139606                      | 0.054867                      | -761.0883424 |
|                                               | AuP(CH <sub>3</sub> ) <sub>3</sub> N <sub>3</sub> cycloOctyneClickTS | -1073.154266            | -1073.182221                                     | 0.305784   | -0.0363511 | 0.327519                      | 0.074896                      | -1072.904882 |
|                                               | AuP(CH <sub>3</sub> ) <sub>3</sub> N <sub>3</sub> cycloOctyneProduct | -1073.288016            | -1073.338793                                     | 0.311716   | -0.0387612 | 0.331866                      | 0.070552                      | -1073.054197 |
| <b><u>Re (DMSO)</u></b>                       | <b>Re-N<sub>3</sub></b>                                              | -1078.457350            | -1078.426792                                     | 0.199196   | -0.0408405 | 0.220220                      | 0.071925                      | -1078.254762 |
|                                               | Re-N <sub>3</sub> cycloOctyneClickTS                                 | -1390.446088            | -1390.418368                                     | 0.378198   | -0.0656304 | 0.408069                      | 0.094196                      | -1390.073411 |
|                                               | <b>Re<sub>N1</sub></b>                                               | -1390.584551            | -1390.57315                                      | 0.384948   | -0.0686342 | 0.412937                      | 0.086961                      | -1390.218477 |
|                                               | ReN1toN2isomerizationTS                                              | -1390.551564            | -1390.528453                                     | 0.383644   | -0.0697456 | 0.411254                      | 0.086821                      | -1390.175369 |
|                                               | <b>Re<sub>N2</sub></b>                                               | -1390.590465            | -1390.573774                                     | 0.384732   | -0.0645756 | 0.412875                      | 0.088299                      | -1390.220059 |
| <b><u>Ru (C<sub>6</sub>H<sub>6</sub>)</u></b> | <b>Ru-N<sub>3</sub></b>                                              | -3034.102610            | -3034.025997                                     | 0.765927   | -0.1809022 | 0.817797                      | 0.138321                      | -3033.300875 |
|                                               | Ru-N <sub>3</sub> cycloOctyneClickTS                                 | -3346.080393            | -3346.00311                                      | 0.945198   | -0.2138496 | 1.005568                      | 0.157136                      | -3345.102823 |
|                                               | Ru-N <sub>3</sub> cycloOctyneProduct                                 | -3346.193681            | -3346.151681                                     | 0.951687   | -0.2216199 | 1.010572                      | 0.152519                      | -3345.243297 |
|                                               |                                                                      |                         |                                                  |            |            |                               |                               |              |
|                                               | RuP(CH <sub>3</sub> ) <sub>3</sub> N <sub>3</sub>                    | -1883.655948            | -1883.652508                                     | 0.443302   | -0.0889423 | 0.476204                      | 0.093735                      | -1883.239106 |
|                                               | RuP(CH <sub>3</sub> ) <sub>3</sub> N <sub>3</sub> cycloOctyneClickTS | -2195.639437            | -2195.643566                                     | 0.622629   | -0.1197783 | 0.664117                      | 0.112933                      | -2195.055114 |
|                                               | RuP(CH <sub>3</sub> ) <sub>3</sub> N <sub>3</sub> cycloOctyneProduct | -2195.764332            | -2195.791748                                     | 0.629223   | -0.1250369 | 0.669111                      | 0.108089                      | -2195.195056 |

**Table S15 Cont'd.** Final Energies, Enthalpy and Entropy Corrections, Gibbs Free Energies from  $\omega$ B97xD functional (includes dispersion correction) and SMD solvent correction. In Hartree. See Computational Details for Methods.

| Metal (Solvent)                                                   | Structure                                                                | E(B3LYP/cc-pVDZ) | E( $\omega$ B97xD(SMD)/cc-pVTZ) | ZPE      | H <sub>correction</sub> | S <sub>correction</sub> | G            |
|-------------------------------------------------------------------|--------------------------------------------------------------------------|------------------|---------------------------------|----------|-------------------------|-------------------------|--------------|
| <b>Pt(II) (C<sub>6</sub>H<sub>6</sub>)</b>                        | <b>Pt(II)-N<sub>3</sub></b>                                              | -1717.690972     | -1717.797543                    | 0.618443 | 0.657461                | 0.107616                | -1717.212184 |
|                                                                   | Pt(II)-N <sub>3</sub> cycloOctyneClickTS                                 | -2029.665348     | -2029.781254                    | 0.798756 | 0.845824                | 0.124214                | -2029.018653 |
|                                                                   | Pt(II)-N <sub>3</sub> cycloOctyneProduct                                 | -2029.802561     | -2029.939285                    | 0.805156 | 0.850693                | 0.119924                | -2029.168941 |
|                                                                   |                                                                          |                  |                                 |          |                         |                         |              |
|                                                                   | Pt(II)P(CH <sub>3</sub> ) <sub>3</sub>                                   | -1245.962269     | -1246.006897                    | 0.277118 | 0.300167                | 0.074648                | -1245.756745 |
|                                                                   | Pt(II)P(CH <sub>3</sub> ) <sub>3</sub> N <sub>3</sub> cycloOctyneClickTS | -1557.949114     | -1558.00082763                  | 0.456503 | 0.488118                | 0.094588                | -1557.576084 |
|                                                                   | Pt(II)P(CH <sub>3</sub> ) <sub>3</sub> N <sub>3</sub> cycloOctyneProduct | -1558.084680     | -1558.156063                    | 0.462364 | 0.492493                | 0.090608                | -1557.724277 |
| <b>W (DMSO)</b>                                                   | <b>W-N<sub>3</sub></b>                                                   | -1071.236245     | -1071.223202                    | 0.260776 | 0.283259                | 0.073804                | -1070.989392 |
|                                                                   | W-N <sub>3</sub> cycloOctyneClickTS                                      | -1382.641196     | -1383.214859                    | 0.440151 | 0.471281                | 0.093700                | -1382.806357 |
|                                                                   | <b>W<sub>N1</sub></b>                                                    | -1383.357342     | -1383.367703                    | 0.446884 | 0.476217                | 0.088260                | -1382.95062  |
|                                                                   | WN1toN2isomerizationTS                                                   | -1382.753024     | -1383.342891                    | 0.445900 | 0.474839                | 0.088250                | -1382.951992 |
|                                                                   | <b>W<sub>N2</sub></b>                                                    | -1382.781085     | -1383.371468                    | 0.446700 | 0.476169                | 0.089452                | -1382.955232 |
| <b>Pt(IV) (C<sub>6</sub>H<sub>6</sub>)</b>                        | <b>Pt(IV)-N<sub>3</sub></b>                                              | -1325.737086     | -1325.797858                    | 0.352443 | 0.379196                | 0.080820                | -1325.472811 |
|                                                                   | Pt(IV)-N <sub>3</sub> cycloOctyneClickTS                                 | -1637.722330     | -1637.789997                    | 0.531872 | 0.567109                | 0.100079                | -1637.289941 |
|                                                                   | <b>Pt(IV)<sub>N1</sub></b>                                               | -1637.861677     | -1637.948366                    | 0.538496 | 0.572073                | 0.095106                | -1637.440014 |
|                                                                   | Pt(IV)N1toN2isomerizationTS                                              | -1637.831218     | -1637.910983                    | 0.536274 | 0.569904                | 0.096576                | -1637.405785 |
|                                                                   | <b>Pt(IV)<sub>N2</sub></b>                                               | -1637.870653     | -1637.950989                    | 0.537858 | 0.571815                | 0.097123                | -1637.444247 |
| <b>(PtN<sub>3</sub>)<sub>4</sub> (C<sub>6</sub>H<sub>6</sub>)</b> | <b>(PtN<sub>3</sub>)<sub>4</sub></b>                                     | -1613.945159     | -1614.034769                    | 0.497548 | 0.544877                | 0.126006                | -1613.574316 |
|                                                                   | (PtN <sub>3</sub> ) <sub>4</sub> cycloOctyneClickTS                      | -1925.900653     | -1925.998404                    | 0.678575 | 0.733991                | 0.143592                | -1925.36062  |
|                                                                   | (PtN <sub>3</sub> ) <sub>4</sub> cycloOctyneProduct                      | -1926.049509     | -1926.171591                    | 0.686608 | 0.739804                | 0.13747                 | -1925.523891 |
|                                                                   |                                                                          |                  |                                 |          |                         |                         |              |
|                                                                   | Pt(CH <sub>3</sub> ) <sub>3</sub> N <sub>3</sub>                         | -403.4286385     | -403.4294300                    | 0.121835 | 0.134056                | 0.051586                | -403.3299367 |
|                                                                   | Pt(CH <sub>3</sub> ) <sub>3</sub> N <sub>3</sub> cycloOctyneClickTS      | -715.4190124     | -715.4233534                    | 0.301254 | 0.322014                | 0.07201                 | -715.1495861 |
|                                                                   | Pt(CH <sub>3</sub> ) <sub>3</sub> N <sub>3</sub> cycloOctyneProduct      | -715.5486168     | -715.5741836                    | 0.307045 | 0.326108                | 0.066568                | -715.2926762 |

## 2.8 Relative Enthalpies and Gibbs Free Energies of SPAAC iClick Reactivity

**Table S16.** Relative Energies (Becke-Johnson damping corrections, B3LYP/PCM corrected SPE) --Table sorted by metal center; in parentheses is the solvent correction used. All values are in kcal/mol at 298 K and 1 atm.

|                                               | <b>Structure</b>                                                     | <b><math>\Delta H</math></b> | <b><math>\Delta G</math></b> |                                                                          | <b>Structure</b>                                                         | <b><math>\Delta H</math></b> | <b><math>\Delta G</math></b> |  |
|-----------------------------------------------|----------------------------------------------------------------------|------------------------------|------------------------------|--------------------------------------------------------------------------|--------------------------------------------------------------------------|------------------------------|------------------------------|--|
| <b><u>Au (THF)</u></b>                        | <b>Au-N<sub>3</sub></b>                                              | <b>0.0</b>                   | <b>0.0</b>                   | <b><u>Pt(II) (C<sub>6</sub>H<sub>6</sub>)</u></b>                        | <b>Pt(II)-N<sub>3</sub></b>                                              | <b>0.0</b>                   | <b>0.0</b>                   |  |
|                                               | Au-N <sub>3</sub> cycloOctyneClickTS                                 | 13.5                         | 21.5                         |                                                                          | Pt(II)-N <sub>3</sub> cycloOctyneClickTS                                 | 19.9                         | 30.0                         |  |
|                                               | <b>Au<sub>N1</sub></b>                                               | -69.2                        | -58.8                        |                                                                          | Pt(II)-N <sub>3</sub> cycloOctyneProduct                                 | -62.4                        | -50.4                        |  |
|                                               | AuN1toN2isomerizationTS                                              | -51.7                        | -40.9                        |                                                                          |                                                                          |                              |                              |  |
|                                               | <b>Au<sub>N2</sub></b>                                               | -69.4                        | -59.9                        |                                                                          | Pt(II)P(CH <sub>3</sub> ) <sub>3</sub> N <sub>3</sub>                    | <b>0.0</b>                   | <b>0.0</b>                   |  |
|                                               | AuP(CH <sub>3</sub> ) <sub>3</sub> N <sub>3</sub>                    | <b>0.0</b>                   | <b>0.0</b>                   |                                                                          | Pt(II)P(CH <sub>3</sub> ) <sub>3</sub> N <sub>3</sub> cycloOctyneClickTS | 9.4                          | 18.2                         |  |
| <b><u>Re (DMSO)</u></b>                       | AuP(CH <sub>3</sub> ) <sub>3</sub> N <sub>3</sub> cycloOctyneClickTS | 13.7                         | 22.4                         | Pt(II)P(CH <sub>3</sub> ) <sub>3</sub> N <sub>3</sub> cycloOctyneProduct | -73.2                                                                    | -62.8                        |                              |  |
|                                               | AuP(CH <sub>3</sub> ) <sub>3</sub> N <sub>3</sub> cycloOctyneProduct | -69.0                        | -58.5                        | <b><u>W (DMSO)</u></b>                                                   | <b>W-N<sub>3</sub></b>                                                   | <b>0.0</b>                   | <b>0.0</b>                   |  |
|                                               | <b>Re-N<sub>3</sub></b>                                              | <b>0.0</b>                   | <b>0.0</b>                   | W-N <sub>3</sub> cycloOctyneClickTS                                      | 11.7                                                                     | 20.5                         |                              |  |
|                                               | Re-N <sub>3</sub> cycloOctyneClickTS                                 | 12.8                         | 20.6                         | <b>W<sub>N1</sub></b>                                                    | -67.6                                                                    | -56.5                        |                              |  |
|                                               | <b>Re<sub>N1</sub></b>                                               | -68.1                        | -57.4                        | WN1toN2isomerizationTS                                                   | -52.3                                                                    | -41.2                        |                              |  |
|                                               | ReN1toN2isomerizationTS                                              | -49.3                        | -38.4                        | <b>W<sub>N2</sub></b>                                                    | -70.2                                                                    | -59.6                        |                              |  |
| <b><u>Ru (C<sub>6</sub>H<sub>6</sub>)</u></b> | Re <sub>N2</sub>                                                     | -69.1                        | -58.9                        | <b><u>Pt(IV) (C<sub>6</sub>H<sub>6</sub>)</u></b>                        | <b>Pt(IV)-N<sub>3</sub></b>                                              | <b>0.0</b>                   | <b>0.0</b>                   |  |
|                                               | <b>Ru-N<sub>3</sub></b>                                              | <b>0.0</b>                   | <b>0.0</b>                   | Pt(IV)-N <sub>3</sub> cycloOctyneClickTS                                 | 12.6                                                                     | 21.7                         |                              |  |
|                                               | Ru-N <sub>3</sub> cycloOctyneClickTS                                 | 20.4                         | 29.6                         | <b>Pt(IV)<sub>N1</sub></b>                                               | -70.3                                                                    | -59.2                        |                              |  |
|                                               | Ru-N <sub>3</sub> cycloOctyneProduct                                 | -56.4                        | -45.3                        | Pt(IV) <sub>N1</sub> toN2isomerizationTS                                 | -49.7                                                                    | -39.2                        |                              |  |
|                                               |                                                                      |                              |                              | <b>Pt(IV)<sub>N2</sub></b>                                               | -71.8                                                                    | -61.5                        |                              |  |
|                                               |                                                                      |                              |                              | <b>(PtN<sub>3</sub>)<sub>4</sub></b>                                     | <b>0.0</b>                                                               | <b>0.0</b>                   |                              |  |
| <b><u>Ru (C<sub>6</sub>H<sub>6</sub>)</u></b> | RuP(CH <sub>3</sub> ) <sub>3</sub> N <sub>3</sub>                    | <b>0.0</b>                   | <b>0.0</b>                   | (PtN <sub>3</sub> ) <sub>4</sub> cycloOctyneClickTS                      | 30.4                                                                     | 40.1                         |                              |  |
|                                               | RuP(CH <sub>3</sub> ) <sub>3</sub> N <sub>3</sub> cycloOctyneClickTS | 12.1                         | 21.2                         | (PtN <sub>3</sub> ) <sub>4</sub> cycloOctyneProduct                      | -60.5                                                                    | -48.2                        |                              |  |
|                                               | RuP(CH <sub>3</sub> ) <sub>3</sub> N <sub>3</sub> cycloOctyneProduct | -64.4                        | -53.3                        |                                                                          |                                                                          |                              |                              |  |
|                                               |                                                                      |                              |                              | Pt(CH <sub>3</sub> ) <sub>3</sub> N <sub>3</sub>                         | <b>0.0</b>                                                               | <b>0.0</b>                   |                              |  |
|                                               |                                                                      |                              |                              | Pt(CH <sub>3</sub> ) <sub>3</sub> N <sub>3</sub> cycloOctyneClickTS      | 11.7                                                                     | 20.2                         |                              |  |
|                                               |                                                                      |                              |                              | Pt(CH <sub>3</sub> ) <sub>3</sub> N <sub>3</sub> cycloOctyneProduct      | -67.8                                                                    | -56.9                        |                              |  |



**Table S18.** Relative Energies (zero damping corrections, B3LYP/SMD corrected SPE) --Table sorted by metal center; in parenthesis is the solvent correction used. All values are in kcal/mol at 298 K and 1 atm.

|                                                                      | <b>Structure</b>                                                     | <b><math>\Delta H</math></b> | <b><math>\Delta G</math></b>                                             |                                                                     | <b>Structure</b>                                                         | <b><math>\Delta H</math></b> | <b><math>\Delta G</math></b> |
|----------------------------------------------------------------------|----------------------------------------------------------------------|------------------------------|--------------------------------------------------------------------------|---------------------------------------------------------------------|--------------------------------------------------------------------------|------------------------------|------------------------------|
| <b><u>Au (THF)</u></b>                                               | <b>Au-N<sub>3</sub></b>                                              | <b>0.0</b>                   | <b>0.0</b>                                                               | <b><u>Pt (II) (C<sub>6</sub>H<sub>6</sub>)</u></b>                  | <b>Pt(II)-N<sub>3</sub></b>                                              | <b>0.0</b>                   | <b>0.0</b>                   |
|                                                                      | Au-N <sub>3</sub> cycloOctyneClickTS                                 | 14.7                         | 22.6                                                                     |                                                                     | Pt(II)-N <sub>3</sub> cycloOctyneClickTS                                 | 20.0                         | 30.2                         |
|                                                                      | <b>Au<sub>N1</sub></b>                                               | -68.7                        | -58.3                                                                    |                                                                     | Pt(II)-N <sub>3</sub> cycloOctyneProduct                                 | -62.7                        | -50.7                        |
|                                                                      | AuN1toN2isomerizationTS                                              | -51.1                        | -40.3                                                                    |                                                                     |                                                                          |                              |                              |
|                                                                      | <b>Au<sub>N2</sub></b>                                               | -69.0                        | -59.5                                                                    |                                                                     | Pt(II)P(CH <sub>3</sub> ) <sub>3</sub> N <sub>3</sub>                    | <b>0.0</b>                   | <b>0.0</b>                   |
|                                                                      | AuP(CH <sub>3</sub> ) <sub>3</sub> N <sub>3</sub>                    | <b>0.0</b>                   | <b>0.0</b>                                                               |                                                                     | Pt(II)P(CH <sub>3</sub> ) <sub>3</sub> N <sub>3</sub> cycloOctyneClickTS | 13.3                         | 22.0                         |
|                                                                      | AuP(CH <sub>3</sub> ) <sub>3</sub> N <sub>3</sub> cycloOctyneProduct | -68.5                        | -57.9                                                                    |                                                                     | Pt(II)P(CH <sub>3</sub> ) <sub>3</sub> N <sub>3</sub> cycloOctyneProduct | -69.0                        | -58.6                        |
| <b><u>Re (DMSO)</u></b>                                              | <b>Re-N<sub>3</sub></b>                                              | <b>0.0</b>                   | <b>0.0</b>                                                               | <b><u>W (C<sub>6</sub>H<sub>6</sub>)</u></b>                        | <b>W-N<sub>3</sub></b>                                                   | <b>0.0</b>                   | <b>0.0</b>                   |
|                                                                      | Re-N <sub>3</sub> cycloOctyneClickTS                                 | 12.8                         | 20.6                                                                     |                                                                     | W-N <sub>3</sub> cycloOctyneClickTS                                      | 12.2                         | 21.0                         |
|                                                                      | <b>Re<sub>N1</sub></b>                                               | -68.3                        | -57.5                                                                    |                                                                     | <b>W<sub>N1</sub></b>                                                    | -67.2                        | -56.1                        |
|                                                                      | ReN1toN2isomerizationTS                                              | -49.0                        | -38.2                                                                    |                                                                     | WN1toN2isomerizationTS                                                   | -51.8                        | -40.7                        |
|                                                                      | <b>Re<sub>N2</sub></b>                                               | -68.7                        | -58.5                                                                    |                                                                     | <b>W<sub>N2</sub></b>                                                    | -69.7                        | -59.1                        |
| <b><u>Ru (C<sub>6</sub>H<sub>6</sub>)</u></b>                        | <b>Ru-N<sub>3</sub></b>                                              | <b>0.0</b>                   | <b>0.0</b>                                                               | <b><u>Pt (IV) (C<sub>6</sub>H<sub>6</sub>)</u></b>                  | <b>Pt(IV)-N<sub>3</sub></b>                                              | <b>0.0</b>                   | <b>0.0</b>                   |
|                                                                      | Ru-N <sub>3</sub> cycloOctyneClickTS                                 | 22.8                         | 32.0                                                                     |                                                                     | Pt(IV)-N <sub>3</sub> cycloOctyneClickTS                                 | 14.3                         | 23.3                         |
|                                                                      | Ru-N <sub>3</sub> cycloOctyneProduct                                 | -53.0                        | -41.9                                                                    |                                                                     | <b>Pt(IV)<sub>N1</sub></b>                                               | -68.7                        | -57.6                        |
|                                                                      |                                                                      |                              |                                                                          |                                                                     | Pt(IV)N1toN2isomerizationTS                                              | -47.4                        | -36.9                        |
|                                                                      |                                                                      |                              |                                                                          |                                                                     | <b>Pt(IV)<sub>N2</sub></b>                                               | -70.8                        | -60.5                        |
|                                                                      |                                                                      |                              |                                                                          |                                                                     | <b>(PtN<sub>3</sub>)<sub>4</sub></b>                                     | <b>0.0</b>                   | <b>0.0</b>                   |
|                                                                      | RuP(CH <sub>3</sub> ) <sub>3</sub> N <sub>3</sub>                    | <b>0.0</b>                   | <b>0.0</b>                                                               |                                                                     | (PtN <sub>3</sub> ) <sub>4</sub> cycloOctyneClickTS                      | 32.1                         | 41.9                         |
| RuP(CH <sub>3</sub> ) <sub>3</sub> N <sub>3</sub> cycloOctyneClickTS | 14.3                                                                 | 23.4                         | (PtN <sub>3</sub> ) <sub>4</sub> cycloOctyneProduct                      | -58.8                                                               | -46.5                                                                    |                              |                              |
| RuP(CH <sub>3</sub> ) <sub>3</sub> N <sub>3</sub> cycloOctyneProduct | -61.8                                                                | -50.7                        |                                                                          |                                                                     |                                                                          |                              |                              |
|                                                                      |                                                                      |                              | <b><u>(PtN<sub>3</sub>)<sub>4</sub> (C<sub>6</sub>H<sub>6</sub>)</u></b> | Pt(CH <sub>3</sub> ) <sub>3</sub> N <sub>3</sub>                    | <b>0.0</b>                                                               | <b>0.0</b>                   |                              |
|                                                                      |                                                                      |                              |                                                                          | Pt(CH <sub>3</sub> ) <sub>3</sub> N <sub>3</sub> cycloOctyneClickTS | 12.5                                                                     | 21.1                         |                              |
|                                                                      |                                                                      |                              |                                                                          | Pt(CH <sub>3</sub> ) <sub>3</sub> N <sub>3</sub> cycloOctyneProduct | -67.3                                                                    | -56.5                        |                              |

**Table S19.** Relativ Energies (zero damping corrections, CAM-B3LYP/SMD corrected SPE) --Table sorted by metal center; in parenthesis is the solvent correction used. All values are in kcal/mol at 298 K and 1 atm.

|                                                                      | <b>Structure</b>                                                     | <b><math>\Delta H</math></b> | <b><math>\Delta G</math></b>                                             |                                                     | <b>Structure</b>                                                         | <b><math>\Delta H</math></b> | <b><math>\Delta G</math></b> |  |
|----------------------------------------------------------------------|----------------------------------------------------------------------|------------------------------|--------------------------------------------------------------------------|-----------------------------------------------------|--------------------------------------------------------------------------|------------------------------|------------------------------|--|
| <b><u>Au (THF)</u></b>                                               | <b>Au-N<sub>3</sub></b>                                              | <b>0.0</b>                   | <b>0.0</b>                                                               | <b><u>Pt (II) (C<sub>6</sub>H<sub>6</sub>)</u></b>  | <b>Pt(II)-N<sub>3</sub></b>                                              | <b>0.0</b>                   | <b>0.0</b>                   |  |
|                                                                      | Au-N <sub>3</sub> cycloOctyneClickTS                                 | 15.6                         | 23.6                                                                     |                                                     | Pt(II)-N <sub>3</sub> cycloOctyneClickTS                                 | 21.4                         | 31.5                         |  |
|                                                                      | <b>AuN<sub>1</sub></b>                                               | -77.4                        | -67.0                                                                    |                                                     | Pt(II)-N <sub>3</sub> cycloOctyneProduct                                 | -71.0                        | -59.1                        |  |
|                                                                      | AuN <sub>1</sub> toN <sub>2</sub> isomerizationTS                    | -59.5                        | -48.7                                                                    |                                                     |                                                                          |                              |                              |  |
|                                                                      | <b>AuN<sub>2</sub></b>                                               | -78.1                        | -68.6                                                                    |                                                     | Pt(II)P(CH <sub>3</sub> ) <sub>3</sub> N <sub>3</sub>                    | <b>0.0</b>                   | <b>0.0</b>                   |  |
|                                                                      | AuP(CH <sub>3</sub> ) <sub>3</sub> N <sub>3</sub>                    | <b>0.0</b>                   | <b>0.0</b>                                                               |                                                     | Pt(II)P(CH <sub>3</sub> ) <sub>3</sub> N <sub>3</sub> cycloOctyneClickTS | 14.6                         | 23.3                         |  |
|                                                                      | AuP(CH <sub>3</sub> ) <sub>3</sub> N <sub>3</sub> cycloOctyneProduct | -77.1                        | -66.6                                                                    |                                                     | Pt(II)P(CH <sub>3</sub> ) <sub>3</sub> N <sub>3</sub> cycloOctyneProduct | -77.3                        | -66.9                        |  |
| <b><u>Re (DMSO)</u></b>                                              | <b>Re-N<sub>3</sub></b>                                              | <b>0.0</b>                   | <b>0.0</b>                                                               | <b><u>W (C<sub>6</sub>H<sub>6</sub>)</u></b>        | <b>W-N<sub>3</sub></b>                                                   | <b>0.0</b>                   | <b>0.0</b>                   |  |
|                                                                      | Re-N <sub>3</sub> cycloOctyneClickTS                                 | 13.9                         | 21.7                                                                     |                                                     | W-N <sub>3</sub> cycloOctyneClickTS                                      | 13.9                         | 22.7                         |  |
|                                                                      | <b>ReN<sub>1</sub></b>                                               | -77.5                        | -66.7                                                                    |                                                     | <b>WN<sub>1</sub></b>                                                    | -76.1                        | -65.0                        |  |
|                                                                      | ReN <sub>1</sub> toN <sub>2</sub> isomerizationTS                    | -56.8                        | -45.9                                                                    |                                                     | WN <sub>1</sub> toN <sub>2</sub> isomerizationTS                         | -60.6                        | -49.5                        |  |
|                                                                      | <b>ReN<sub>2</sub></b>                                               | -78.3                        | -68.1                                                                    |                                                     | <b>WN<sub>2</sub></b>                                                    | -79.0                        | -68.4                        |  |
| <b><u>Ru (C<sub>6</sub>H<sub>6</sub>)</u></b>                        | <b>Ru-N<sub>3</sub></b>                                              | <b>0.0</b>                   | <b>0.0</b>                                                               | <b><u>Pt (IV) (C<sub>6</sub>H<sub>6</sub>)</u></b>  | <b>Pt(IV)-N<sub>3</sub></b>                                              | <b>0.0</b>                   | <b>0.0</b>                   |  |
|                                                                      | Ru-N <sub>3</sub> cycloOctyneClickTS                                 | 24.7                         | 33.9                                                                     |                                                     | Pt(IV)-N <sub>3</sub> cycloOctyneClickTS                                 | 15.5                         | 24.6                         |  |
|                                                                      | Ru-N <sub>3</sub> cycloOctyneProduct                                 | -61.0                        | -49.9                                                                    |                                                     | <b>Pt(IV)<sub>N1</sub></b>                                               | -77.7                        | -66.6                        |  |
|                                                                      |                                                                      |                              |                                                                          |                                                     | Pt(IV)N <sub>1</sub> toN <sub>2</sub> isomerizationTS                    | -54.4                        | -43.9                        |  |
|                                                                      |                                                                      |                              |                                                                          |                                                     | <b>Pt(IV)<sub>N2</sub></b>                                               | -80.2                        | -70.0                        |  |
|                                                                      |                                                                      |                              | <b><u>(PtN<sub>3</sub>)<sub>4</sub> (C<sub>6</sub>H<sub>6</sub>)</u></b> | <b>(PtN<sub>3</sub>)<sub>4</sub></b>                | <b>0.0</b>                                                               | <b>0.0</b>                   |                              |  |
| RuP(CH <sub>3</sub> ) <sub>3</sub> N <sub>3</sub>                    | <b>0.0</b>                                                           | <b>0.0</b>                   |                                                                          | (PtN <sub>3</sub> ) <sub>4</sub> cycloOctyneClickTS | 36.1                                                                     | 45.8                         |                              |  |
| RuP(CH <sub>3</sub> ) <sub>3</sub> N <sub>3</sub> cycloOctyneClickTS | 16.2                                                                 | 25.3                         |                                                                          | (PtN <sub>3</sub> ) <sub>4</sub> cycloOctyneProduct | -66.0                                                                    | -53.7                        |                              |  |
| RuP(CH <sub>3</sub> ) <sub>3</sub> N <sub>3</sub> cycloOctyneProduct | -70.0                                                                | -59.0                        |                                                                          |                                                     |                                                                          |                              |                              |  |
|                                                                      |                                                                      |                              |                                                                          | Pt(CH <sub>3</sub> ) <sub>3</sub> N <sub>3</sub>    | <b>0.0</b>                                                               | <b>0.0</b>                   |                              |  |
|                                                                      |                                                                      |                              | Pt(CH <sub>3</sub> ) <sub>3</sub> N <sub>3</sub> cycloOctyneClickTS      | 14.0                                                | 22.5                                                                     |                              |                              |  |
|                                                                      |                                                                      |                              | Pt(CH <sub>3</sub> ) <sub>3</sub> N <sub>3</sub> cycloOctyneProduct      | -76.2                                               | -65.4                                                                    |                              |                              |  |

**Table S20.** Relative Energies (MN15/SMD corrected SPE) --Table sorted by metal center; in parenthesis is the solvent correction used. All values are in kcal/mol at 298 K and 1 atm.

|                                                                      | <b>Structure</b>                                                     | <b><math>\Delta H</math></b> | <b><math>\Delta G</math></b>                                             |                                                                     | <b>Structure</b>                                                         | <b><math>\Delta H</math></b> | <b><math>\Delta G</math></b> |  |
|----------------------------------------------------------------------|----------------------------------------------------------------------|------------------------------|--------------------------------------------------------------------------|---------------------------------------------------------------------|--------------------------------------------------------------------------|------------------------------|------------------------------|--|
| <b><u>Au (THF)</u></b>                                               | <b>Au-N<sub>3</sub></b>                                              | <b>0.0</b>                   | <b>0.0</b>                                                               | <b><u>Pt (II) (C<sub>6</sub>H<sub>6</sub>)</u></b>                  | <b>Pt(II)-N<sub>3</sub></b>                                              | <b>0.0</b>                   | <b>0.0</b>                   |  |
|                                                                      | Au-N <sub>3</sub> cycloOctyneClickTS                                 | 16.8                         | 24.8                                                                     |                                                                     | Pt(II)-N <sub>3</sub> cycloOctyneClickTS                                 | 22.6                         | 32.8                         |  |
|                                                                      | <b>AuN<sub>1</sub></b>                                               | -77.5                        | -67.1                                                                    |                                                                     | Pt(II)-N <sub>3</sub> cycloOctyneProduct                                 | -72.0                        | -60.1                        |  |
|                                                                      | AuN <sub>1</sub> toN <sub>2</sub> isomerizationTS                    | -60.3                        | -49.6                                                                    |                                                                     |                                                                          |                              |                              |  |
|                                                                      | <b>AuN<sub>2</sub></b>                                               | -78.3                        | -68.8                                                                    |                                                                     | Pt(II)P(CH <sub>3</sub> ) <sub>3</sub> N <sub>3</sub>                    | <b>0.0</b>                   | <b>0.0</b>                   |  |
|                                                                      | AuP(CH <sub>3</sub> ) <sub>3</sub> N <sub>3</sub>                    | <b>0.0</b>                   | <b>0.0</b>                                                               |                                                                     | Pt(II)P(CH <sub>3</sub> ) <sub>3</sub> N <sub>3</sub> cycloOctyneClickTS | 15.4                         | 24.1                         |  |
|                                                                      | AuP(CH <sub>3</sub> ) <sub>3</sub> N <sub>3</sub> cycloOctyneProduct | -77.4                        | -66.8                                                                    |                                                                     | Pt(II)P(CH <sub>3</sub> ) <sub>3</sub> N <sub>3</sub> cycloOctyneProduct | -77.7                        | -67.3                        |  |
| <b><u>Re (DMSO)</u></b>                                              | <b>Re-N<sub>3</sub></b>                                              | <b>0.0</b>                   | <b>0.0</b>                                                               | <b><u>W (C<sub>6</sub>H<sub>6</sub>)</u></b>                        | <b>W-N<sub>3</sub></b>                                                   | <b>0.0</b>                   | <b>0.0</b>                   |  |
|                                                                      | Re-N <sub>3</sub> cycloOctyneClickTS                                 | 15.4                         | 23.2                                                                     |                                                                     | W-N <sub>3</sub> cycloOctyneClickTS                                      | 14.5                         | 23.2                         |  |
|                                                                      | <b>ReN<sub>1</sub></b>                                               | -77.8                        | -67.0                                                                    |                                                                     | <b>WN<sub>1</sub></b>                                                    | -76.8                        | -65.7                        |  |
|                                                                      | ReN <sub>1</sub> toN <sub>2</sub> isomerizationTS                    | -51.1                        | -40.2                                                                    |                                                                     | WN <sub>1</sub> toN <sub>2</sub> isomerizationTS                         | -63.0                        | -51.9                        |  |
|                                                                      | <b>ReN<sub>2</sub></b>                                               | -78.7                        | -68.5                                                                    |                                                                     | <b>WN<sub>2</sub></b>                                                    | -79.9                        | -69.4                        |  |
| <b><u>Ru (C<sub>6</sub>H<sub>6</sub>)</u></b>                        | <b>Ru-N<sub>3</sub></b>                                              | <b>0.0</b>                   | <b>0.0</b>                                                               | <b><u>Pt (IV) (C<sub>6</sub>H<sub>6</sub>)</u></b>                  | <b>Pt(IV)-N<sub>3</sub></b>                                              | <b>0.0</b>                   | <b>0.0</b>                   |  |
|                                                                      | Ru-N <sub>3</sub> cycloOctyneClickTS                                 | 26.8                         | 36.0                                                                     |                                                                     | Pt(IV)-N <sub>3</sub> cycloOctyneClickTS                                 | 15.2                         | 24.2                         |  |
|                                                                      | Ru-N <sub>3</sub> cycloOctyneProduct                                 | -63.0                        | -51.8                                                                    |                                                                     | <b>Pt(IV)<sub>N1</sub></b>                                               | -79.4                        | -68.3                        |  |
|                                                                      |                                                                      |                              |                                                                          |                                                                     | Pt(IV)N <sub>1</sub> toN <sub>2</sub> isomerizationTS                    | -57.1                        | -46.6                        |  |
|                                                                      |                                                                      |                              |                                                                          |                                                                     | <b>Pt(IV)<sub>N2</sub></b>                                               | -81.5                        | -71.2                        |  |
|                                                                      |                                                                      |                              |                                                                          |                                                                     | <b>(PtN<sub>3</sub>)<sub>4</sub></b>                                     | <b>0.0</b>                   | <b>0.0</b>                   |  |
|                                                                      | RuP(CH <sub>3</sub> ) <sub>3</sub> N <sub>3</sub>                    | <b>0.0</b>                   | <b>0.0</b>                                                               |                                                                     | (PtN <sub>3</sub> ) <sub>4</sub> cycloOctyneClickTS                      | 37.9                         | 47.7                         |  |
| RuP(CH <sub>3</sub> ) <sub>3</sub> N <sub>3</sub> cycloOctyneClickTS | 17.3                                                                 | 26.3                         | (PtN <sub>3</sub> ) <sub>4</sub> cycloOctyneProduct                      | -63.7                                                               | -51.4                                                                    |                              |                              |  |
| RuP(CH <sub>3</sub> ) <sub>3</sub> N <sub>3</sub> cycloOctyneProduct | -72.0                                                                | -60.9                        |                                                                          |                                                                     |                                                                          |                              |                              |  |
|                                                                      |                                                                      |                              | <b><u>(PtN<sub>3</sub>)<sub>4</sub> (C<sub>6</sub>H<sub>6</sub>)</u></b> | Pt(CH <sub>3</sub> ) <sub>3</sub> N <sub>3</sub>                    | <b>0.0</b>                                                               | <b>0.0</b>                   |                              |  |
|                                                                      |                                                                      |                              |                                                                          | Pt(CH <sub>3</sub> ) <sub>3</sub> N <sub>3</sub> cycloOctyneClickTS | 14.7                                                                     | 23.2                         |                              |  |
|                                                                      |                                                                      |                              |                                                                          | Pt(CH <sub>3</sub> ) <sub>3</sub> N <sub>3</sub> cycloOctyneProduct | -75.1                                                                    | -64.2                        |                              |  |



**Table S21.** Relative Energies ( $\omega$ B97xD/SMD corrected SPE) --Table sorted by metal center; in parenthesis is the solvent correction used. All values are in kcal/mol at 298 K and 1 atm.

|                                                                      | <b>Structure</b>                                  | <b><math>\Delta H</math></b> | <b><math>\Delta G</math></b>                                             |                                                                     | <b>Structure</b>                                                         | <b><math>\Delta H</math></b> | <b><math>\Delta G</math></b> |
|----------------------------------------------------------------------|---------------------------------------------------|------------------------------|--------------------------------------------------------------------------|---------------------------------------------------------------------|--------------------------------------------------------------------------|------------------------------|------------------------------|
| <b><u>Au (THF)</u></b>                                               | <b>Au-N<sub>3</sub></b>                           | <b>0.0</b>                   | <b>0.0</b>                                                               | <b><u>Pt (II) (C<sub>6</sub>H<sub>6</sub>)</u></b>                  | <b>Pt(II)-N<sub>3</sub></b>                                              | <b>0.0</b>                   | <b>0.0</b>                   |
|                                                                      | Au-N <sub>3</sub> cycloOctyneClickTS              | 15.6                         | 23.6                                                                     |                                                                     | Pt(II)-N <sub>3</sub> cycloOctyneClickTS                                 | 21.0                         | 31.2                         |
|                                                                      | <b>Au<sub>N1</sub></b>                            | -79.8                        | -69.4                                                                    |                                                                     | Pt(II)-N <sub>3</sub> cycloOctyneProduct                                 | -75.1                        | -63.1                        |
|                                                                      | AuN1toN2isomerizationTS                           | -62.0                        | -51.3                                                                    |                                                                     |                                                                          |                              |                              |
|                                                                      | <b>Au<sub>N2</sub></b>                            | -79.6                        | -70.1                                                                    |                                                                     |                                                                          |                              |                              |
|                                                                      |                                                   |                              |                                                                          |                                                                     | Pt(II)P(CH <sub>3</sub> ) <sub>3</sub> N <sub>3</sub>                    | <b>0.0</b>                   | <b>0.0</b>                   |
|                                                                      | AuP(CH <sub>3</sub> ) <sub>3</sub> N <sub>3</sub> | <b>0.0</b>                   | <b>0.0</b>                                                               |                                                                     | Pt(II)P(CH <sub>3</sub> ) <sub>3</sub> N <sub>3</sub> cycloOctyneClickTS | 14.4                         | 23.1                         |
| AuP(CH <sub>3</sub> ) <sub>3</sub> N <sub>3</sub> cycloOctyneClickTS | 16.0                                              | 24.7                         | Pt(II)P(CH <sub>3</sub> ) <sub>3</sub> N <sub>3</sub> cycloOctyneProduct | -80.3                                                               | -69.9                                                                    |                              |                              |
| AuP(CH <sub>3</sub> ) <sub>3</sub> N <sub>3</sub> cycloOctyneProduct | -79.5                                             | -69.0                        | <b><u>W (C<sub>6</sub>H<sub>6</sub>)</u></b>                             | <b>W-N<sub>3</sub></b>                                              | <b>0.0</b>                                                               | <b>0.0</b>                   |                              |
| <b><u>Re (DMSO)</u></b>                                              | <b>Re-N<sub>3</sub></b>                           | <b>0.0</b>                   |                                                                          | <b>0.0</b>                                                          | W-N <sub>3</sub> cycloOctyneClickTS                                      | 14.4                         | 23.1                         |
|                                                                      | Re-N <sub>3</sub> cycloOctyneClickTS              | 14.3                         |                                                                          | 22.1                                                                | <b>W<sub>N1</sub></b>                                                    | -78.4                        | -67.4                        |
|                                                                      | <b>Re<sub>N1</sub></b>                            | -79.8                        |                                                                          | -69.0                                                               | WN1toN2isomerizationTS                                                   | -79.3                        | -68.3                        |
|                                                                      | ReN1toN2isomerizationTS                           | -52.8                        | -41.9                                                                    | <b>W<sub>N2</sub></b>                                               | -80.8                                                                    | -70.3                        |                              |
|                                                                      |                                                   |                              |                                                                          |                                                                     |                                                                          |                              |                              |
|                                                                      |                                                   |                              | <b><u>Pt (IV) (C<sub>6</sub>H<sub>6</sub>)</u></b>                       | <b>Pt(IV)-N<sub>3</sub></b>                                         | <b>0.0</b>                                                               | <b>0.0</b>                   |                              |
|                                                                      |                                                   |                              |                                                                          | Pt(IV)-N <sub>3</sub> cycloOctyneClickTS                            | 15.5                                                                     | 24.5                         |                              |
| <b><u>Ru (C<sub>6</sub>H<sub>6</sub>)</u></b>                        | <b>Ru-N<sub>3</sub></b>                           | <b>0.0</b>                   | <b>0.0</b>                                                               | <b>Pt(IV)<sub>N1</sub></b>                                          | -80.8                                                                    | -69.7                        |                              |
|                                                                      | Ru-N <sub>3</sub> cycloOctyneClickTS              | 24.8                         | 34.0                                                                     | Pt(IV)N1toN2isomerizationTS                                         | -58.7                                                                    | -48.2                        |                              |
|                                                                      | Ru-N <sub>3</sub> cycloOctyneProduct              | -65.3                        | -54.1                                                                    | <b>Pt(IV)<sub>N2</sub></b>                                          | -82.6                                                                    | -72.4                        |                              |
|                                                                      |                                                   |                              |                                                                          | <b>(PtN<sub>3</sub>)<sub>4</sub></b>                                | <b>0.0</b>                                                               | <b>0.0</b>                   |                              |
|                                                                      |                                                   |                              | <b><u>(PtN<sub>3</sub>)<sub>4</sub> (C<sub>6</sub>H<sub>6</sub>)</u></b> | (PtN <sub>3</sub> ) <sub>4</sub> cycloOctyneClickTS                 | 34.1                                                                     | 43.8                         |                              |
|                                                                      |                                                   |                              |                                                                          | (PtN <sub>3</sub> ) <sub>4</sub> cycloOctyneProduct                 | -70.9                                                                    | -58.6                        |                              |
|                                                                      |                                                   |                              |                                                                          |                                                                     |                                                                          |                              |                              |
|                                                                      |                                                   |                              |                                                                          | Pt(CH <sub>3</sub> ) <sub>3</sub> N <sub>3</sub>                    | <b>0.0</b>                                                               | <b>0.0</b>                   |                              |
|                                                                      |                                                   |                              |                                                                          | Pt(CH <sub>3</sub> ) <sub>3</sub> N <sub>3</sub> cycloOctyneClickTS | 14.4                                                                     | 22.9                         |                              |
|                                                                      |                                                   |                              |                                                                          | Pt(CH <sub>3</sub> ) <sub>3</sub> N <sub>3</sub> cycloOctyneProduct | -77.7                                                                    | -66.9                        |                              |

## 2.9 Functional Comparison of % $V_{\text{bur}}$ vs. $\Delta G^\ddagger$

**Table S22.** Comparison of Different Functionals' Calculated Enthalpic and Gibb's Free Energy Barriers for SPAAC iClick ( $\Delta H^\ddagger$  and  $\Delta G^\ddagger$ )

| Compound                                              | B3LYP (PCM)         |                     | B3LYP (SMD)         |                     | CAM-B3LYP (SMD)     |                     | MN15 (SMD)          |                     | $\omega$ B97xD (SMD) |                     |
|-------------------------------------------------------|---------------------|---------------------|---------------------|---------------------|---------------------|---------------------|---------------------|---------------------|----------------------|---------------------|
|                                                       | $\Delta H^\ddagger$ | $\Delta G^\ddagger$ | $\Delta H^\ddagger$  | $\Delta G^\ddagger$ |
| <b>Au-N<sub>3</sub></b>                               | 14.9                | 22.9                | 14.7                | 22.6                | 14.3                | 22.3                | 16.8                | 24.8                | 15.6                 | 23.6                |
| AuP(CH <sub>3</sub> ) <sub>3</sub> N <sub>3</sub>     | 15.2                | 23.9                | 14.8                | 23.5                | 14.5                | 23.2                | 16.9                | 25.6                | 16.0                 | 24.7                |
| <b>Re-N<sub>3</sub></b>                               | 14.1                | 21.8                | 12.8                | 20.6                | 12.4                | 20.2                | 15.4                | 23.2                | 14.3                 | 22.1                |
| <b>Ru-N<sub>3</sub></b>                               | 22.0                | 31.3                | 22.8                | 32.0                | 21.8                | 31.0                | 26.8                | 36.0                | 24.8                 | 34.0                |
| RuP(CH <sub>3</sub> ) <sub>3</sub> N <sub>3</sub>     | 13.6                | 22.6                | 14.3                | 23.4                | 13.6                | 22.6                | 17.3                | 26.3                | 16.1                 | 25.2                |
| <b>Pt(II)-N<sub>3</sub></b>                           | 19.1                | 29.2                | 20.0                | 30.2                | 18.7                | 28.9                | 22.6                | 32.8                | 21.0                 | 31.2                |
| Pt(II)P(CH <sub>3</sub> ) <sub>3</sub> N <sub>3</sub> | 13.0                | 21.7                | 13.3                | 22.0                | 12.3                | 21.0                | 15.4                | 24.1                | 14.4                 | 23.1                |
| <b>W-N<sub>3</sub></b>                                | 13.2                | 21.9                | 12.2                | 21.0                | 11.6                | 20.3                | 14.5                | 23.2                | 14.4                 | 23.1                |
| <b>Pt(IV)-N<sub>3</sub></b>                           | 14.2                | 23.2                | 14.3                | 23.3                | 13.3                | 22.3                | 15.2                | 24.2                | 15.5                 | 24.5                |
| <b>(PtN<sub>3</sub>)<sub>4</sub></b>                  | 31.3                | 41.0                | 32.1                | 41.9                | 34.0                | 43.8                | 37.9                | 47.7                | 34.1                 | 43.8                |
| Pt(CH <sub>3</sub> ) <sub>3</sub> N <sub>3</sub>      | 12.9                | 21.4                | 12.5                | 21.1                | 12.3                | 20.8                | 14.7                | 23.2                | 14.4                 | 22.9                |

\*Highlighted azides were attempted experimentally.

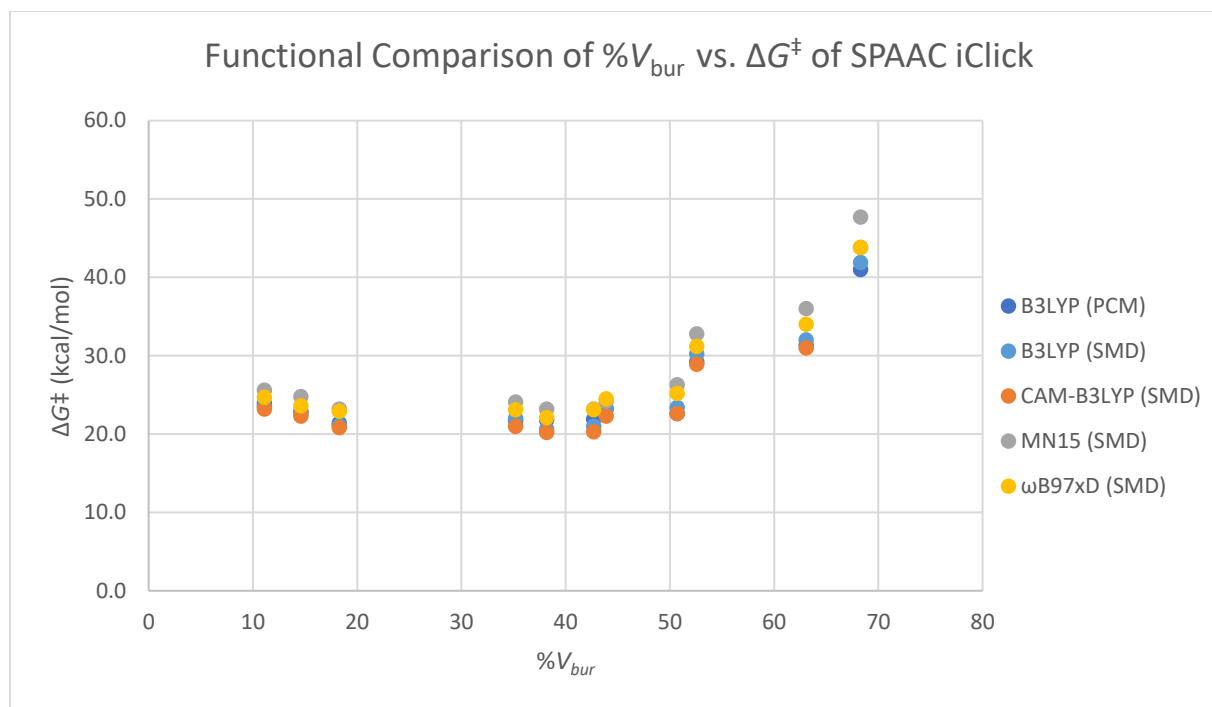

**Figure S31.** % $V_{bur}$  vs.  $\Delta G^\ddagger$  for the various theoretical functionals analyzed. All functionals illustrate the same general trend; that the  $\Delta G^\ddagger$  is directly affected by % $V_{bur}$ . This effect is “turned on” as % $V_{bur}$  increases above 50%.

## 2.10 Effect of Solvent optimization on **Au-N<sub>3</sub>** Energies

**Table S23.** **Au-N<sub>3</sub>** Energies, Enthalpy and Entropy Corrections, Gibbs Free Energies with Solvent Optimization Correction-structures optimized with solvent correction (THF) at both optimization and single-point energy calculations (zero damping dispersion correction, D0, used).

| Structures (THF)                          | E(B3LYP/cc-pVDZ) | E(B3LYP/cc-pVTZ) | ZPE      | D0         | H <sub>correction</sub> | S <sub>correction</sub> | G        |
|-------------------------------------------|------------------|------------------|----------|------------|-------------------------|-------------------------|----------|
| Cyclooctyne                               | -312.013         | -312.1151182     | 0.178392 | -0.0155411 | 0.187240                | 0.0407140               | -311.971 |
| <b>Au-N<sub>3</sub></b>                   | -1336.42         | -1336.680816     | 0.287179 | -0.0447322 | 0.309839                | 0.079997                | -1336.47 |
| <b>Au-N<sub>3</sub>cycloOctyneClickTS</b> | -1648.40         | -1648.764873     | 0.465916 | -0.0678064 | 0.497386                | 0.101549                | -1648.40 |
| <b>Au<sub>N1</sub></b>                    | -1648.54         | -1648.898010     | 0.472341 | -0.0705372 | 0.502093                | 0.095916                | -1648.53 |
| <b>AuN1toN2isomerizationTS</b>            | -1648.52         | -1648.871044     | 0.471455 | -0.0691844 | 0.500681                | 0.095171                | -1648.50 |
| <b>Au<sub>N2</sub></b>                    | -1648.55         | -1648.90078      | 0.472435 | -0.0682111 | 0.501293                | 0.092646                | -1648.53 |

**Table S24.** Effect of Solvent on **Au-N<sub>3</sub>** Potential Energy Surface -structures optimized with solvent correction (THF) at both optimization and single-point energy calculations (zero damping dispersion correction, D0, used).

| Structure (THF)                      | $\Delta H$ | $\Delta G$ |
|--------------------------------------|------------|------------|
| Au-N <sub>3</sub>                    | <b>0.0</b> | <b>0.0</b> |
| Au-N <sub>3</sub> cycloOctyneClickTS | 15.0       | 23.0       |
| Au <sub>N1</sub>                     | -67.3      | -56.9      |
| AuN1toN2isomerizationTS              | -50.5      | -39.7      |
| Au <sub>N2</sub>                     | -68.1      | -56.3      |

### 3. References

- 1 G. M. Sheldrick, *Acta Cryst.*, 2015, **C71**, 3–8.
- 2 S. Vailati Facchini, J. M. Neudörfl, L. Pignataro, M. Cettolin, C. Gennari, A. Berkessel and U. Piarulli, *ChemCatChem*, 2017, **9**, 1461–1468.
- 3 H. C. Kolb, M. G. Finn and K. B. Sharpless, *Angew. Chem. Int. Ed.*, 2001, **40**, 2004–2021.
- 4 P. Schmid, M. Maier, H. Pfeiffer, A. Belz, L. Henry, A. Friedrich, F. Schönfeld, K. Edkins and U. Schatzschneider, *Dalton Trans.*, 2017, **46**, 13386–13396.
- 5 K. S. Schanze, D. Brent MacQueen, T. A. Perkins and L. A. Cabana, *Coord. Chem. Rev.*, 1993, **122**, 63–89.
- 6 C. K. Chen, H. C. Tong, C. Y. C. Hsu, C. Y. Lee, Y. H. Fong, Y. S. Chuang, Y. H. Lo, Y. C. Lin and Y. Wang, *Organometallics*, 2009, **28**, 3358–3368.
- 7 K. H. von Dahlen and J. Lorberth, *J. Organomet. Chem.*, 1974, **65**, 267–273.
- 8 S. Schlecht, N. Faza, W. Massa, S. Dapprich, G. Frenking and K. Dehnicke, *Z. Anorg. Allg. Chem.*, 1998, **624**, 1011–1014.
- 9 M. J. Frisch, G. W. Trucks, H. B. Schlegel, G. E. Scuseria, M. A. Robb, J. R. Cheeseman, G. Scalmani, V. Barone, B. Mennucci, G. A. Petersson, H. Nakatsuji, M. Caricato, X. Li, H. P. Hratchian, A. F. Izmaylov, J. Bloino, G. Zheng, J. L. Sonnenberg, M. Hada, M. Ehara, K. Toyota, R. Fukuda, J. Hasegawa, M. Ishida, T. Nakajima, Y. Honda, O. Kitao, H. Nakai, T. Vreven, J. A. Montgomery Jr., J. E. Peralta, F. Ogliaro, M. Bearpark, J. J. Heyd, E. Brothers, K. N. Kudin, V. N. Staroverov, R. Kobayashi, J. Normand, K. Raghavachari, A. Rendell, J. C. Burant, S. S. Iyengar, J. Tomasi, M. Cossi, N. Rega, J. M. Millam, M. Klene, J. E. Knox, J. B. Cross, V. Bakken, C. Adamo, J. Jaramillo, R. Gomperts, R. E. Stratmann, O. Yazyev, A. J. Austin, R. Cammi, C. Pomelli, J. W. Ochterski, R. L. Martin, K. Morokuma, V. G. Zakrzewski, G. A. Voth, P. Salvador, J. J. Dannenberg, S. Dapprich, A. D. Daniels, Farkas, J. B. Foresman, J. V. Ortiz, J. Cioslowski and D. J. Fox, *Gaussian 09 Revis. C.01*, 2010, Gaussian Inc., Wallingford CT.
- 10 A. D. Becke, *J. Chem. Phys.*, 1993, **98**, 5648–5652.
- 11 C. Lee, W. Yang and R. G. Parr, *Phys. Rev. B*, 1988, **37**, 785–789.
- 12 N. B. Balabanov and K. A. Peterson, *J. Chem. Phys.*, 2005, **123**, 64107.
- 13 N. B. Balabanov and K. A. Peterson, *J. Chem. Phys.*, 2006, **125**, 074110.
- 14 K. L. Schuchardt, B. T. Didier, T. Elsethagen, L. Sun, V. Gurumoorthi, J. Chase, J. Li and T. L. Windus, *J. Chem. Inf. Model.*, 2007, **47**, 1045–1052.
- 15 E. J. Baerends, D. E. Ellis and P. Ros, *Chem. Phys.*, 1973, **2**, 41–51.
- 16 J. L. Whitten, *J. Chem. Phys.*, 1973, **58**, 4496–4501.
- 17 M. Feyereisen, G. Fitzgerald and A. Komornicki, *Chem. Phys. Lett.*, 1993, **208**, 359–363.
- 18 O. Vahtras, J. Almlöf and M. W. Feyereisen, *Chem. Phys. Lett.*, 1993, **213**, 514–518.
- 19 H. P. Hratchian and H. B. Schlegel, *J. Chem. Theory Comput.*, 2005, **1**, 61–69.
- 20 J. Tomasi, *Theor. Chem. Acc.*, 2004, **112**, 184–203.
- 21 S. Grimme, *Wiley Interdiscip. Rev. Comput. Mol. Sci.*, 2011, **1**, 211–228.
- 22 S. Grimme, S. Ehrlich and L. Goerigk, *J. Comput. Chem.*, 2011, **32**, 1456–1465.
- 23 S. Tobisch and T. Ziegler, *J. Am. Chem. Soc.*, 2004, **126**, 9059–9071.
- 24 F. Zaccaria, C. Ehm, P. H. M. Budzelaar and V. Busico, *ACS Catal.*, 2017, **7**, 1512–1519.
- 25 F. Zaccaria, R. Cipullo, P. H. M. Budzelaar, V. Busico and C. Ehm, *J. Polym. Sci. Part A Polym. Chem.*, 2017, **55**, 2807–2814.
- 26 A. V. Marenich, C. J. Cramer and D. G. Truhlar, *J. Phys. Chem. B*, 2009, **113**, 6378–6396.
- 27 T. Yanai, D. P. Tew and N. C. Handy, *Chem. Phys. Lett.*, 2004, **393**, 51–57.
- 28 H. S. Yu, X. He, S. L. Li and D. G. Truhlar, *Chem. Sci.*, 2016, **7**, 5032–5051.
- 29 M. J. Frisch, G. W. Trucks, H. B. Schlegel, G. E. Scuseria, M. A. Robb, J. R. Cheeseman, G. Scalmani, V. Barone, G. A. Petersson, H. Nakatsuji, X. Li, M. Caricato, A. V. Marenich, J. Bloino, B. G. Janesko, R. Gomperts, B. Mennucci, H. P. Hratchian, J. V. Ortiz, A. F. Izmaylov, J. L. Sonnenberg, D. Williams-Young, F. Ding, F. Lipparini, F. Egidi, J. Goings, B. Peng, A. Petrone, T. Henderson, D. Ranasinghe, V. G. Zakrzewski, J. Gao, N. Rega, G. Zheng, W. Liang, M. Hada, M. Ehara, K. Toyota, R. Fukuda, J. Hasegawa, M. Ishida, T. Nakajima, Y. Honda, O. Kitao, H. Nakai, T. Vreven, K. Throssell, J. Montgomery, J. A., J. E. Peralta, F. Ogliaro, M. J. Bearpark, J. J. Heyd,

E. N. Brothers, K. N. Kudin, V. N. Staroverov, T. A. Keith, R. Kobayashi, J. Normand, K. Raghavachari, A. P. Rendell, J. C. Burant, S. S. Iyengar, J. Tomasi, M. Cossi, J. M. Millam, M. Klene, C. Adamo, R. Cammi, J. W. Ochterski, R. L. Martin, K. Morokuma, O. Farkas, J. B. Foresman and D. J. Fox, *Gaussian 16 Revis. C.01*, 2016, Gaussian, Inc., Wallingford, CT.

30 J. Da Chai and M. Head-Gordon, *Phys. Chem. Chem. Phys.*, 2008, **10**, 6615–6620.

31 L. Falivene, R. Credendino, A. Poater, A. Petta, L. Serra, R. Oliva, V. Scarano and L. Cavallo, *Organometallics*, 2016, **35**, 2286–2293.
